# Supplementary material
Source: publisher site journal article supplement (https://www.dovepress.com/article/454295)
Supplement: Supplementary file 1 [file get_supplementary_file.php]

A

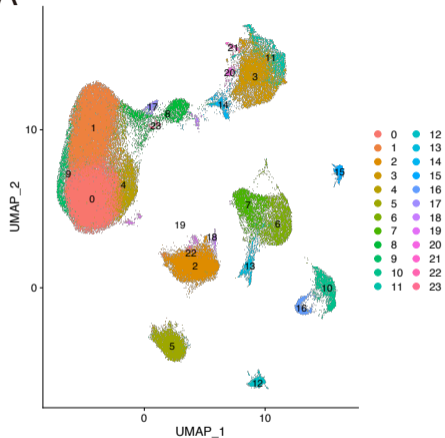

B

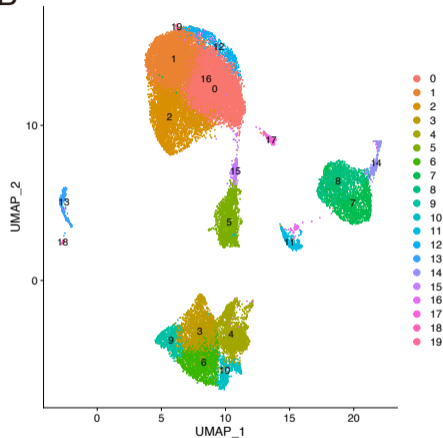

Figure S1 Clusters of pCRC (A) and LM (B) cells.

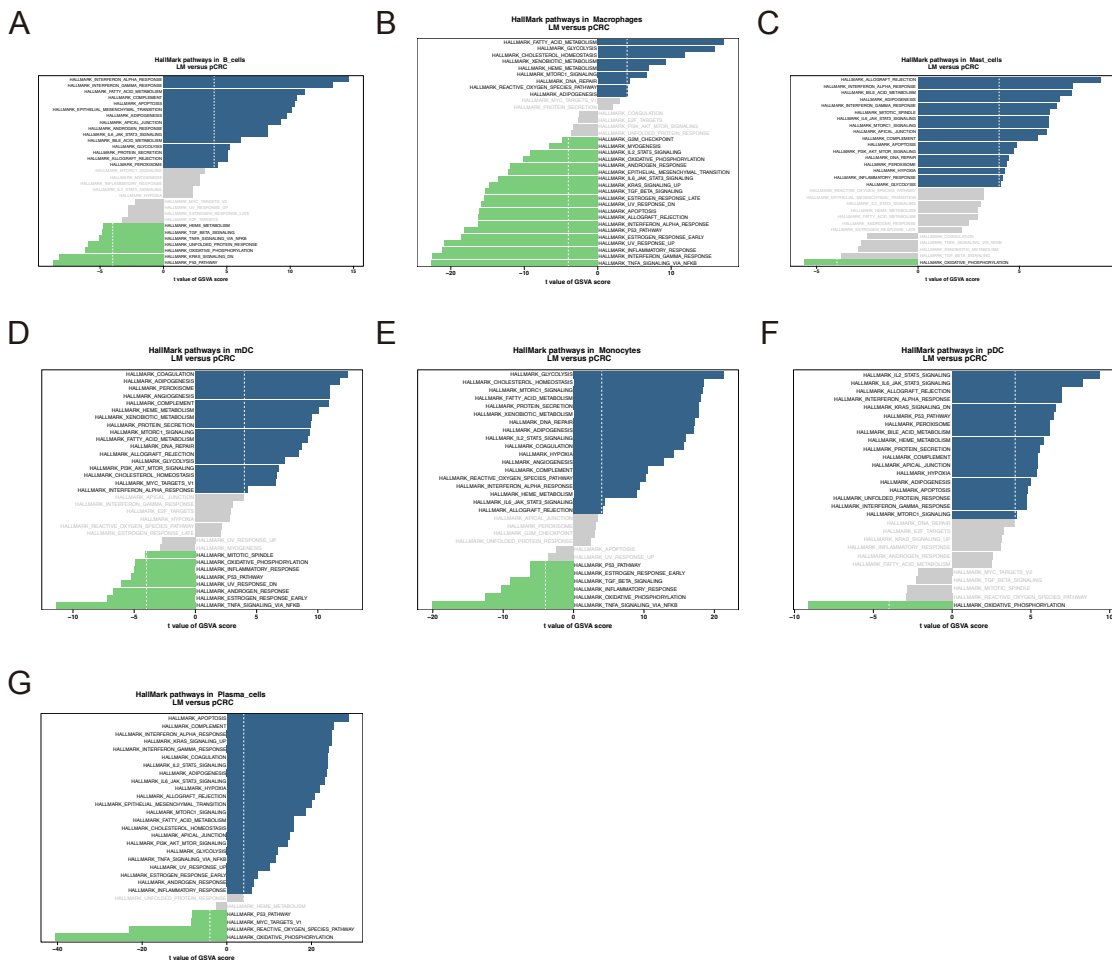

Figure S2 The results of GSVA between LM and pCRC samples in B cells(A), macrophage (B), mast cells (C), mDC(D), monocytes (E), pDC (F), plasma cells(G) subsets. mDC, myeloid dendritic cells; pDC, plasmacytoid dendritic cells.

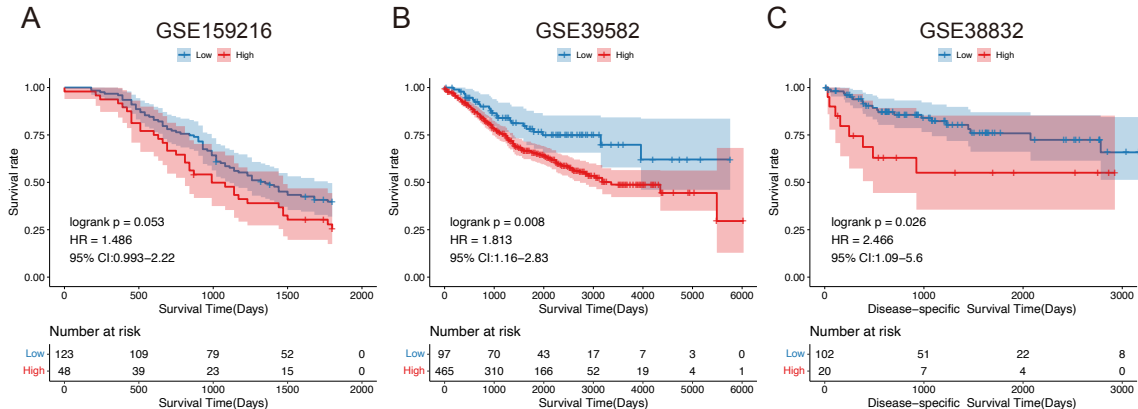

Figure S3 K-M survival analyses demonstrated significantly poorer OS (A-B) and DSS (C) in patients with a high BM index. OS, Overall survival; DSS, Disease-specific survival .

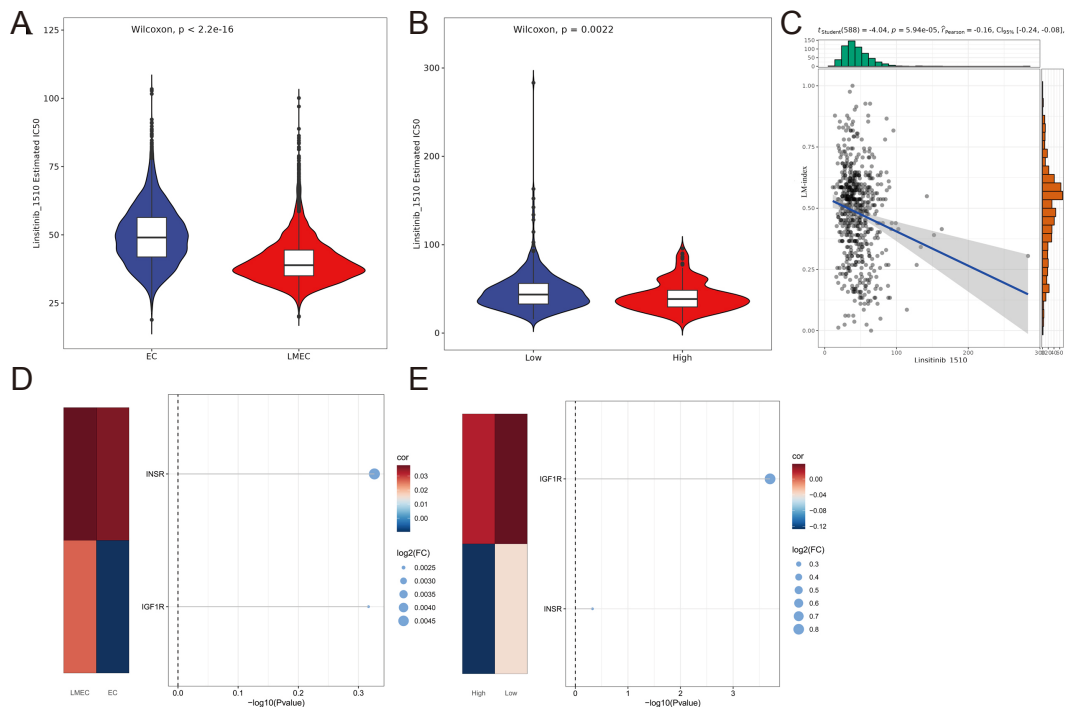

Figure S4 Drug characterization and analysis of Linsitinib\_1510.

The differential drug-response analysis in LMECs/ECs(A), high/low-LM-index patients(B).

(C)Spearman's correlation analysis of drugs and LM-index.

Spearman's correlation analysis between gene expressions of drug targets and drug-response in LMECs/ECs(D, left panel), high/low-LM-index patients(E, left panel).

The differential expression analysis of drug targets between LMECs and ECs(D, right panel), high- and low-LM-index patients (E, right panel).

Table S1-Source Data.

| Name in this study | run_accession | sample_accession                                                          | library_name | data        |
|--------------------|---------------|---------------------------------------------------------------------------|--------------|-------------|
| LM_COL07           | GSM5387661    | scRNA-seq of liver metastases of colorectal cancer:COL07 liver metastases | COL07_L      | GSE178318   |
| pCRC_COL07         | GSM5387660    | scRNA-seq of liver metastases of colorectal cancer:COL07 primary CRC      | COL07_P      | GSE178318   |
| LM_COL12           | GSM5387663    | scRNA-seq of liver metastases of colorectal cancer:COL12 liver metastases | COL12_L      | GSE178318   |
| pCRC_COL12         | GSM5387662    | scRNA-seq of liver metastases of colorectal cancer:COL12 primary CRC      | COL12_P      | GSE178318   |
| LM_COL16           | GSM5387668    | scRNA-seq of liver metastases of colorectal cancer:COL16 liver metastases | COL16_L      | GSE178318   |
| pCRC_COL16         | GSM5387667    | scRNA-seq of liver metastases of colorectal cancer:COL16 primary CRC      | COL16_P      | GSE178318   |
| pCRC_S10           | SRR15331895   | SAMN20336359                                                              | S-10XJM      | PRJNA748525 |
| pCRC_S11           | SRR15331893   | SAMN20336360                                                              | S-11XJM      | PRJNA748525 |
| pCRC_S12           | SRR15331913   | SAMN20336361                                                              | S-12XJM      | PRJNA748525 |
| pCRC_S13           | SRR15331911   | SAMN20336362                                                              | S-13XJM      | PRJNA748525 |
| pCRC_S14           | SRR15331909   | SAMN20336363                                                              | S-14XJM      | PRJNA748525 |
| pCRC_S1            | SRR15331917   | SAMN20336351                                                              | S-1XJM       | PRJNA748525 |
| pCRC_S2            | SRR15331915   | SAMN20336352                                                              | S-2XJM       | PRJNA748525 |
| pCRC_S3            | SRR15331905   | SAMN20336353                                                              | S-3XJM       | PRJNA748525 |
| pCRC_S5            | SRR15331907   | SAMN20336354                                                              | S-5XJM       | PRJNA748525 |
| pCRC_S6            | SRR15331903   | SAMN20336355                                                              | S-6XJM       | PRJNA748525 |
| pCRC_S7            | SRR15331901   | SAMN20336356                                                              | S-7XJM       | PRJNA748525 |
| pCRC_S8            | SRR15331899   | SAMN20336357                                                              | S-8XJM       | PRJNA748525 |
| pCRC_S9            | SRR15331897   | SAMN20336358                                                              | S-9XJM       | PRJNA748525 |
| pCRC_S9            | SRR15465825   | SAMN20336358                                                              | S-9XJM       | PRJNA748525 |
| pCRC_S9            | SRR15465826   | SAMN20336358                                                              | S-9XJM       | PRJNA748525 |
| pCRC_S9            | SRR15465827   | SAMN20336358                                                              | S-9XJM       | PRJNA748525 |
| LM_M5784           |               |                                                                           | 5784_mCRC    | PMC9811165  |
| LM_M5915           |               |                                                                           | 5915_mCRC    | PMC9811165  |
| LM_M6198           |               |                                                                           | 6198_mCRC    | PMC9811165  |
| LM_M6335           |               |                                                                           | 6335_mCRC    | PMC9811165  |
| LM_M6593           |               |                                                                           | 6593_mCRC    | PMC9811165  |
| LM_M6648           |               |                                                                           | 6648_mCRC    | PMC9811165  |
| LM_M8640           |               |                                                                           | 8640_mCRC    | PMC9811165  |

Table S2-Clinical info of TCGA COAD and READ

| barcode                      | patient      | sample           | shortLetter<br>Code | definition          | project_id | vital_status | days_to_last_<br>follow_up | days_to_<br>death | age_at_<br>diagnosis | os_status | os_time | age_at_<br>diagnosis | gender | ajcc_pathologic_<br>stage | ajcc_pathologic_<br>_t | ajcc_pathologic_<br>_n | ajcc_pathologic_<br>_m |
|------------------------------|--------------|------------------|---------------------|---------------------|------------|--------------|----------------------------|-------------------|----------------------|-----------|---------|----------------------|--------|---------------------------|------------------------|------------------------|------------------------|
| TCGA-AA-A00K-01A-02R-A002-07 | TCGA-AA-A00K | TCGA-AA-A00K-01A | TP                  | Primary solid Tumor | TCGA-COAD  | Alive        | 549                        | NA                | 29189                | 0         | 549     | 80                   | male   | Stage IIA                 | T3                     | N0                     | M0                     |
| TCGA-D5-5538-01A-01R-1653-07 | TCGA-D5-5538 | TCGA-D5-5538-01A | TP                  | Primary solid Tumor | TCGA-COAD  | Dead         | 373                        | 1661              | 21974                | 1         | 1661    | 60                   | female | Stage IIIB                | T3                     | N1b                    | M0                     |
| TCGA-AA-A00A-01A-01R-A002-07 | TCGA-AA-A00A | TCGA-AA-A00A-01A | TP                  | Primary solid Tumor | TCGA-COAD  | Alive        | 1157                       | NA                | 29463                | 0         | 1157    | 81                   | male   | Stage IIA                 | T3                     | N0                     | M0                     |
| TCGA-AA-A02K-01A-03R-A32Y-07 | TCGA-AA-A02K | TCGA-AA-A02K-01A | TP                  | Primary solid Tumor | TCGA-COAD  | Dead         | 0                          | 426               | 18506                | 1         | 426     | 51                   | male   | Stage IV                  | T4                     | N2                     | M1                     |
| TCGA-D5-6922-01A-11R-1928-07 | TCGA-D5-6922 | TCGA-D5-6922-01A | TP                  | Primary solid Tumor | TCGA-COAD  | Alive        | 308                        | NA                | 27771                | 0         | 308     | 76                   | male   | Stage IIIA                | T3                     | N1                     | M0                     |
| TCGA-AD-5900-01A-11R-1653-07 | TCGA-AD-5900 | TCGA-AD-5900-01A | TP                  | Primary solid Tumor | TCGA-COAD  | Alive        | 370                        | NA                | 24776                | 0         | 370     | 68                   | male   | Stage I                   | T2                     | N0                     | MX                     |
| TCGA-AA-3495-01A-01R-1410-07 | TCGA-AA-3495 | TCGA-AA-3495-01A | TP                  | Primary solid Tumor | TCGA-COAD  | Alive        | 1127                       | NA                | 28886                | 0         | 1127    | 79                   | male   | Stage I                   | T2                     | N0                     | M0                     |
| TCGA-AD-6888-01A-11R-1928-07 | TCGA-AD-6888 | TCGA-AD-6888-01A | TP                  | Primary solid Tumor | TCGA-COAD  | Dead         | 155                        | 472               | 26816                | 1         | 472     | 73                   | male   | Stage IIIB                | T3                     | N1b                    | M0                     |
| TCGA-CA-5256-01A-01R-1410-07 | TCGA-CA-5256 | TCGA-CA-5256-01A | TP                  | Primary solid Tumor | TCGA-COAD  | Alive        | 379                        | NA                | 19785                | 0         | 379     | 54                   | female | Stage IIA                 | T3                     | N0                     | M0                     |
| TCGA-G4-6299-01A-11R-1774-07 | TCGA-G4-6299 | TCGA-G4-6299-01A | TP                  | Primary solid Tumor | TCGA-COAD  | Alive        | 2268                       | NA                | 25318                | 0         | 2268    | 69                   | male   | Stage IIIC                | T3                     | N2                     | M0                     |
| TCGA-AZ-4313-01A-01R-1410-07 | TCGA-AZ-4313 | TCGA-AZ-4313-01A | TP                  | Primary solid Tumor | TCGA-COAD  | Alive        | 2310                       | NA                | 18765                | 0         | 2310    | 51                   | female | Stage I                   | T1                     | N0                     | M0                     |
| TCGA-A6-2686-11A-01R-A32Z-07 | TCGA-A6-2686 | TCGA-A6-2686-11A | NT                  | Solid Tissue Normal | TCGA-COAD  | Dead         | 488                        | 1126              | 29623                | 1         | 1126    | 81                   | female | Stage IIA                 | T3                     | N0                     | M0                     |
| TCGA-AA-3872-01A-01R-1022-07 | TCGA-AA-3872 | TCGA-AA-3872-01A | TP                  | Primary solid Tumor | TCGA-COAD  | Alive        | 0                          | NA                | 16651                | 0         | 0       | 46                   | male   | Stage IV                  | T4                     | N2                     | M1                     |
| TCGA-F4-6854-01A-11R-1928-07 | TCGA-F4-6854 | TCGA-F4-6854-01A | TP                  | Primary solid Tumor | TCGA-COAD  | Alive        | 16                         | NA                | 28272                | 0         | 16      | 77                   | female | Stage IIA                 | T3                     | N0                     | M0                     |
| TCGA-AA-3977-01A-01R-1022-07 | TCGA-AA-3977 | TCGA-AA-3977-01A | TP                  | Primary solid Tumor | TCGA-COAD  | Alive        | 761                        | NA                | 23832                | 0         | 761     | 65                   | male   | NA                        | T2                     | N0                     | NA                     |
| TCGA-CA-5254-01A-21R-1839-07 | TCGA-CA-5254 | TCGA-CA-5254-01A | TP                  | Primary solid Tumor | TCGA-COAD  | Alive        | 386                        | NA                | 15415                | 0         | 386     | 42                   | female | Stage IIA                 | T3                     | N0                     | M0                     |
| TCGA-CK-5916-01A-11R-1653-07 | TCGA-CK-5916 | TCGA-CK-5916-01A | TP                  | Primary solid Tumor | TCGA-COAD  | Dead         | NA                         | 643               | 26024                | 1         | 643     | 71                   | female | Stage I                   | T1                     | N0                     | M0                     |
| TCGA-AA-A03F-01A-11R-A16W-07 | TCGA-AA-A03F | TCGA-AA-A03F-01A | TP                  | Primary solid Tumor | TCGA-COAD  | Dead         | 0                          | 0                 | 32872                | 1         | 0       | 90                   | female | Stage III                 | T3                     | N2                     | M0                     |
| TCGA-AA-A01X-01A-21R-A083-07 | TCGA-AA-A01X | TCGA-AA-A01X-01A | TP                  | Primary solid Tumor | TCGA-COAD  | Alive        | 791                        | NA                | 29281                | 0         | 791     | 80                   | female | Stage III                 | T2                     | N1                     | M0                     |
| TCGA-A6-2678-11A-01R-A32Z-07 | TCGA-A6-2678 | TCGA-A6-2678-11A | NT                  | Solid Tissue Normal | TCGA-COAD  | Alive        | 1286                       | NA                | 16030                | 0         | 1286    | 44                   | female | Stage IIIB                | T3                     | N1                     | M0                     |
| TCGA-A6-2671-11A-01R-A32Z-07 | TCGA-A6-2671 | TCGA-A6-2671-11A | NT                  | Solid Tissue Normal | TCGA-COAD  | Dead         | 1126                       | 1331              | 31329                | 1         | 1331    | 86                   | male   | Stage IV                  | T3                     | N2                     | M1                     |
| TCGA-G4-6304-01A-11R-1928-07 | TCGA-G4-6304 | TCGA-G4-6304-01A | TP                  | Primary solid Tumor | TCGA-COAD  | Alive        | 1631                       | NA                | 24172                | 0         | 1631    | 66                   | female | Stage IIB                 | T4                     | N0                     | M0                     |
| TCGA-AA-3866-01A-01R-1022-07 | TCGA-AA-3866 | TCGA-AA-3866-01A | TP                  | Primary solid Tumor | TCGA-COAD  | Alive        | 518                        | NA                | 28672                | 0         | 518     | 79                   | female | Stage I                   | T2                     | N0                     | M0                     |
| TCGA-AY-4071-01A-01R-1113-07 | TCGA-AY-4071 | TCGA-AY-4071-01A | TP                  | Primary solid Tumor | TCGA-COAD  | Dead         | NA                         | 29                | 23320                | 1         | 29      | 64                   | female | Stage I                   | T1                     | N0                     | NA                     |
| TCGA-AA-3655-01A-02R-1723-07 | TCGA-AA-3655 | TCGA-AA-3655-01A | TP                  | Primary solid Tumor | TCGA-COAD  | Alive        | 1856                       | NA                | 24896                | 0         | 1856    | 68                   | male   | Stage II                  | T3                     | N0                     | M0                     |
| TCGA-AA-3655-11A-01R-1723-07 | TCGA-AA-3655 | TCGA-AA-3655-11A | NT                  | Solid Tissue Normal | TCGA-COAD  | Alive        | 1856                       | NA                | 24896                | 0         | 1856    | 68                   | male   | Stage II                  | T3                     | N0                     | M0                     |
| TCGA-AA-A02E-01A-01R-A00A-07 | TCGA-AA-A02E | TCGA-AA-A02E-01A | TP                  | Primary solid Tumor | TCGA-COAD  | Dead         | NA                         | 90                | 30256                | 1         | 90      | 83                   | female | Stage IV                  | T3                     | N1                     | M1                     |
| TCGA-AA-3510-01A-01R-1410-07 | TCGA-AA-3510 | TCGA-AA-3510-01A | TP                  | Primary solid Tumor | TCGA-COAD  | Alive        | 1946                       | NA                | 25902                | 0         | 1946    | 71                   | male   | Stage II                  | T3                     | N0                     | M0                     |
| TCGA-AA-3561-01A-01R-0821-07 | TCGA-AA-3561 | TCGA-AA-3561-01A | TP                  | Primary solid Tumor | TCGA-COAD  | Alive        | 424                        | NA                | 26420                | 0         | 424     | 72                   | male   | Stage IIA                 | T3                     | N0                     | M0                     |
| TCGA-D5-6930-01A-11R-1928-07 | TCGA-D5-6930 | TCGA-D5-6930-01A | TP                  | Primary solid Tumor | TCGA-COAD  | Alive        | 406                        | NA                | 24764                | 0         | 406     | 68                   | male   | Stage IIA                 | T3                     | N0                     | M0                     |
| TCGA-AU-6004-01A-11R-1723-07 | TCGA-AU-6004 | TCGA-AU-6004-01A | TP                  | Primary solid Tumor | TCGA-COAD  | Alive        | 824                        | NA                | 25259                | 0         | 824     | 69                   | female | Stage I                   | T2                     | N0                     | M0                     |
| TCGA-F4-6461-01A-11R-1774-07 | TCGA-F4-6461 | TCGA-F4-6461-01A | TP                  | Primary solid Tumor | TCGA-COAD  | Dead         | 0                          | 338               | 15151                | 1         | 338     | 42                   | female | Stage IIIC                | T4b                    | N2                     | M0                     |
| TCGA-AA-3675-01A-02R-0905-07 | TCGA-AA-3675 | TCGA-AA-3675-01A | TP                  | Primary solid Tumor | TCGA-COAD  | Alive        | 1431                       | NA                | 30801                | 0         | 1431    | 84                   | male   | Stage II                  | T3                     | N0                     | M0                     |
| TCGA-D5-6926-01A-11R-1928-07 | TCGA-D5-6926 | TCGA-D5-6926-01A | TP                  | Primary solid Tumor | TCGA-COAD  | Alive        | 275                        | NA                | 23768                | 0         | 275     | 65                   | male   | Stage IIIB                | T4a                    | N1                     | M0                     |
| TCGA-A6-2684-01A-01R-A278-07 | TCGA-A6-2684 | TCGA-A6-2684-01A | TP                  | Primary solid Tumor | TCGA-COAD  | Alive        | 1127                       | NA                | 27708                | 0         | 1127    | 76                   | female | Stage I                   | T2                     | N0                     | M0                     |
| TCGA-CM-5868-01A-01R-1653-07 | TCGA-CM-5868 | TCGA-CM-5868-01A | TP                  | Primary solid Tumor | TCGA-COAD  | Alive        | 518                        | NA                | 21672                | 0         | 518     | 59                   | female | Stage IVA                 | T4a                    | N1a                    | M1a                    |
| TCGA-AA-A00O-01A-02R-A089-07 | TCGA-AA-A00O | TCGA-AA-A00O-01A | TP                  | Primary solid Tumor | TCGA-COAD  | Alive        | 822                        | NA                | 30316                | 0         | 822     | 83                   | female | Stage IIIC                | T3                     | N2                     | M0                     |
| TCGA-AA-3527-01A-01R-0821-07 | TCGA-AA-3527 | TCGA-AA-3527-01A | TP                  | Primary solid Tumor | TCGA-COAD  | Alive        | 0                          | NA                | 32871                | 0         | 0       | 90                   | female | Stage IIA                 | T3                     | N0                     | M0                     |
| TCGA-AA-3712-01A-21R-1723-07 | TCGA-AA-3712 | TCGA-AA-3712-01A | TP                  | Primary solid Tumor | TCGA-COAD  | Alive        | 0                          | NA                | 23831                | 0         | 0       | 65                   | male   | Stage III                 | T3                     | N2                     | M0                     |
| TCGA-D5-5540-01A-01R-1653-07 | TCGA-D5-5540 | TCGA-D5-5540-01A | TP                  | Primary solid Tumor | TCGA-COAD  | Alive        | 1706                       | NA                | 26972                | 0         | 1706    | 74                   | male   | Stage IIA                 | T3                     | N0                     | M0                     |
| TCGA-A6-6137-01A-11R-1774-07 | TCGA-A6-6137 | TCGA-A6-6137-01A | TP                  | Primary solid Tumor | TCGA-COAD  | Alive        | 824                        | NA                | 20095                | 0         | 824     | 55                   | male   | Stage IIIB                | T3                     | N1c                    | M0                     |
| TCGA-A6-5667-01A-21R-1723-07 | TCGA-A6-5667 | TCGA-A6-5667-01A | TP                  | Primary solid Tumor | TCGA-COAD  | Alive        | 887                        | NA                | 14756                | 0         | 887     | 40                   | female | Stage IIIB                | T3                     | N1a                    | MX                     |
| TCGA-G4-6628-01A-11R-1839-07 | TCGA-G4-6628 | TCGA-G4-6628-01A | TP                  | Primary solid Tumor | TCGA-COAD  | Alive        | 2424                       | NA                | 28772                | 0         | 2424    | 79                   | male   | Stage I                   | T2                     | N0                     | M0                     |
| TCGA-AY-6196-01A-11R-1723-07 | TCGA-AY-6196 | TCGA-AY-6196-01A | TP                  | Primary solid Tumor | TCGA-COAD  | Alive        | 6                          | NA                | 17311                | 0         | 6       | 47                   | male   | Stage IIIC                | T3                     | N2b                    | NA                     |
| TCGA-AA-3693-01A-01R-0905-07 | TCGA-AA-3693 | TCGA-AA-3693-01A | TP                  | Primary solid Tumor | TCGA-COAD  | Alive        | 0                          | NA                | 28459                | 0         | 0       | 78                   | female | Stage IV                  | T4                     | N1                     | M1                     |
| TCGA-CK-5913-01A-11R-1653-07 | TCGA-CK-5913 | TCGA-CK-5913-01A | TP                  | Primary solid Tumor | TCGA-COAD  | Alive        | 1561                       | NA                | 21399                | 0         | 1561    | 59                   | female | Stage IIA                 | T3                     | N0                     | MX                     |
| TCGA-AA-3688-01A-01R-0905-07 | TCGA-AA-3688 | TCGA-AA-3688-01A | TP                  | Primary solid Tumor | TCGA-COAD  | Alive        | 578                        | NA                | 29220                | 0         | 578     | 80                   | male   | Stage IV                  | T3                     | N1                     | M1                     |
| TCGA-F4-6460-01A-11R-1774-07 | TCGA-F4-6460 | TCGA-F4-6460-01A | TP                  | Primary solid Tumor | TCGA-COAD  | Dead         | 407                        | 972               | 18637                | 1         | 972     | 51                   | female | Stage IIIB                | T3                     | N1                     | M0                     |
| TCGA-AA-3548-01A-01R-1873-07 | TCGA-AA-3548 | TCGA-AA-3548-01A | TP                  | Primary solid Tumor | TCGA-COAD  | Alive        | 1034                       | NA                | 26175                | 0         | 1034    | 72                   | female | Stage IIIC                | T3                     | N2                     | M0                     |
| TCGA-CM-6172-01A-11R-1653-07 | TCGA-CM-6172 | TCGA-CM-6172-01A | TP                  | Primary solid Tumor | TCGA-COAD  | Alive        | 335                        | NA                | 25902                | 0         | 335     | 71                   | female | Stage IIIB                | T3                     | N1a                    | M0                     |
| TCGA-A6-2684-11A-01R-A32Z-07 | TCGA-A6-2684 | TCGA-A6-2684-11A | NT                  | Solid Tissue Normal | TCGA-COAD  | Alive        | 1127                       | NA                | 27708                | 0         | 1127    | 76                   | female | Stage I                   | T2                     | N0                     | M0                     |
| TCGA-AA-3844-01A-01R-1022-07 | TCGA-AA-3844 | TCGA-AA-3844-01A | TP                  | Primary solid Tumor | TCGA-COAD  | Alive        | 454                        | NA                | 28521                | 0         | 454     | 78                   | female | Stage IIIC                | T3                     | N2                     | M0                     |
| TCGA-AZ-4308-01A-01R-1410-07 | TCGA-AZ-4308 | TCGA-AZ-4308-01A | TP                  | Primary solid Tumor | TCGA-COAD  | Alive        | 3324                       | NA                | 17321                | 0         | 3324    | 47                   | female | Stage IIIB                | T3                     | N1                     | M0                     |
| TCGA-A6-3808-01A-01R-1022-07 | TCGA-A6-3808 | TCGA-A6-3808-01A | TP                  | Primary solid Tumor | TCGA-COAD  | Alive        | 1014                       | NA                | 26666                | 0         | 1014    | 73                   | male   | Stage IIA                 | T3                     | N0                     | M0                     |
| TCGA-AD-6963-01A-11R-1928-07 | TCGA-AD-6963 | TCGA-AD-6963-01A | TP                  | Primary solid Tumor | TCGA-COAD  | Alive        | 834                        | NA                | 21294                | 0         | 834     | 58                   | male   | NA                        | T3                     | N0                     | MX                     |
| TCGA-AA-A00L-01A-01R-A002-07 | TCGA-AA-A00L | TCGA-AA-A00L-01A | TP                  | Primary solid Tumor | TCGA-COAD  | Alive        | 1157                       | NA                | 24319                | 0         | 1157    | 67                   | male   | Stage IIA                 | T3                     | N0                     | M0                     |
| TCGA-CM-6161-01A-11R-1653-07 | TCGA-CM-6161 | TCGA-CM-6161-01A | TP                  | Primary solid Tumor | TCGA-COAD  | Alive        | 457                        | NA                | 13363                | 0         | 457     | 37                   | female | Stage I                   | T2                     | N0                     | M0                     |
| TCGA-AA-3980-01A-02R-1022-07 | TCGA-AA-3980 | TCGA-AA-3980-01A | TP                  | Primary solid Tumor | TCGA-COAD  | Alive        | 242                        | NA                | 32630                | 0         | 242     | 89                   | female | Stage I                   | T2                     | N0                     | M0                     |
| TCGA-CM-5341-01A-01R-1410-07 | TCGA-CM-5341 | TCGA-CM-5341-01A | TP                  | Primary solid Tumor | TCGA-COAD  | Alive        | 884                        | NA                | 30163                | 0         | 884     | 83                   | female | Stage IIIA                | T2                     | N1a                    | M0                     |

|                              |              |                  |    |                     |           |       |      |      |       |   |         |         |        |            |     |     |    |
|------------------------------|--------------|------------------|----|---------------------|-----------|-------|------|------|-------|---|---------|---------|--------|------------|-----|-----|----|
| TCGA-CK-4951-01A-01R-1410-07 | TCGA-CK-4951 | TCGA-CK-4951-01A | TP | Primary solid Tumor | TCGA-COAD | Dead  | 2134 | 2134 | 28982 | 1 | 2134    | 79      | female | Stage IIA  | T3  | N0  | M0 |
| TCGA-AA-3712-11A-01R-1723-07 | TCGA-AA-3712 | TCGA-AA-3712-11A | NT | Solid Tissue Normal | TCGA-COAD | Alive | 0    | NA   | 23831 | 0 | 0       | 65      | male   | Stage III  | T3  | N2  | M0 |
| TCGA-A6-2678-01A-01R-0821-07 | TCGA-A6-2678 | TCGA-A6-2678-01A | TP | Primary solid Tumor | TCGA-COAD | Alive | 1286 | NA   | 16030 | 0 | 1286    | 44      | female | Stage IIIB | T3  | N1  | M0 |
| TCGA-AA-3869-01A-01R-1022-07 | TCGA-AA-3869 | TCGA-AA-3869-01A | TP | Primary solid Tumor | TCGA-COAD | Dead  | 0    | 822  | 28062 | 1 | 822     | 77      | male   | Stage IV   | T4  | N2  | M1 |
| TCGA-QG-A5YX-01A-11R-A28H-07 | TCGA-QG-A5YX | TCGA-QG-A5YX-01A | TP | Primary solid Tumor | TCGA-COAD | Alive | 1003 | NA   | 22617 | 0 | 1003    | 62      | female | Stage IIA  | T3  | N0  | MX |
| TCGA-F4-6808-01A-11R-1839-07 | TCGA-F4-6808 | TCGA-F4-6808-01A | TP | Primary solid Tumor | TCGA-COAD | Alive | 1024 | NA   | 19803 | 0 | 1024    | 54      | female | Stage I    | T1  | N0  | M0 |
| TCGA-G4-6306-01A-11R-1774-07 | TCGA-G4-6306 | TCGA-G4-6306-01A | TP | Primary solid Tumor | TCGA-COAD | Alive | 1359 | NA   | 26163 | 0 | 1359    | 72      | male   | NA         | T2  | N0  | M0 |
| TCGA-G4-6626-01A-11R-1774-07 | TCGA-G4-6626 | TCGA-G4-6626-01A | TP | Primary solid Tumor | TCGA-COAD | Dead  | NA   | 1    | 32871 | 1 | 1       | 90      | male   | Stage IIA  | T3  | N0  | M0 |
| TCGA-G4-6294-01A-11R-1774-07 | TCGA-G4-6294 | TCGA-G4-6294-01A | TP | Primary solid Tumor | TCGA-COAD | Dead  | NA   | 858  | 27755 | 1 | 858     | 76      | male   | Stage IV   | T3  | N1  | M1 |
| TCGA-AA-3858-01A-01R-0905-07 | TCGA-AA-3858 | TCGA-AA-3858-01A | TP | Primary solid Tumor | TCGA-COAD | Alive | 945  | NA   | 24806 | 0 | 945     | 68      | male   | Stage I    | T2  | N0  | M0 |
| TCGA-DM-A28F-01A-11R-A32Y-07 | TCGA-DM-A28F | TCGA-DM-A28F-01A | TP | Primary solid Tumor | TCGA-COAD | Dead  | 1094 | 1094 | 26856 | 1 | 1094    | 74      | male   | Stage IIIB | T3  | N1  | M0 |
| TCGA-CA-5797-01A-01R-1653-07 | TCGA-CA-5797 | TCGA-CA-5797-01A | TP | Primary solid Tumor | TCGA-COAD | Alive | 383  | NA   | 20662 | 0 | 383     | 57      | male   | Stage IIA  | T3  | N0  | M0 |
| TCGA-A6-6138-01A-11R-1774-07 | TCGA-A6-6138 | TCGA-A6-6138-01A | TP | Primary solid Tumor | TCGA-COAD | Alive | 685  | NA   | 22523 | 0 | 685     | 62      | male   | Stage I    | T2  | N0  | M0 |
| TCGA-G4-6307-01A-11R-1723-07 | TCGA-G4-6307 | TCGA-G4-6307-01A | TP | Primary solid Tumor | TCGA-COAD | Alive | 1674 | NA   | 13648 | 0 | 1674    | 37      | female | Stage IIIB | T3  | N1  | M0 |
| TCGA-A6-5667-11A-01R-1723-07 | TCGA-A6-5667 | TCGA-A6-5667-11A | NT | Solid Tissue Normal | TCGA-COAD | Alive | 887  | NA   | 14756 | 0 | 887     | 40      | female | Stage IIIB | T3  | N1a | MX |
| TCGA-AY-6386-01A-21R-1723-07 | TCGA-AY-6386 | TCGA-AY-6386-01A | TP | Primary solid Tumor | TCGA-COAD | Alive | 542  | NA   | 24453 | 0 | 542     | 67      | female | Stage IIIB | T3  | N1a | M0 |
| TCGA-AZ-4614-01A-01R-1410-07 | TCGA-AZ-4614 | TCGA-AZ-4614-01A | TP | Primary solid Tumor | TCGA-COAD | Dead  | NA   | 172  | 26267 | 1 | 172     | 72      | female | Stage IVA  | T4a | N1  | M1 |
| TCGA-AA-3555-01A-01R-0821-07 | TCGA-AA-3555 | TCGA-AA-3555-01A | TP | Primary solid Tumor | TCGA-COAD | Alive | 911  | NA   | 29617 | 0 | 911     | 81      | female | Stage IIA  | T3  | N0  | M0 |
| TCGA-AM-5820-01A-01R-1653-07 | TCGA-AM-5820 | TCGA-AM-5820-01A | TP | Primary solid Tumor | TCGA-COAD | Alive | 14   | NA   | 21902 | 0 | 14      | 60      | female | Stage IVA  | T4a | N2  | M1 |
| TCGA-AA-3560-01A-01R-0821-07 | TCGA-AA-3560 | TCGA-AA-3560-01A | TP | Primary solid Tumor | TCGA-COAD | Alive | 608  | NA   | 26359 | 0 | 608     | 72      | female | Stage IIIC | T3  | N2  | M0 |
| TCGA-D5-6541-01A-11R-1723-07 | TCGA-D5-6541 | TCGA-D5-6541-01A | TP | Primary solid Tumor | TCGA-COAD | Alive | 474  | NA   | 18029 | 0 | 474     | 49      | male   | Stage IIA  | T3  | N0  | M0 |
| TCGA-CM-6676-01A-11R-1839-07 | TCGA-CM-6676 | TCGA-CM-6676-01A | TP | Primary solid Tumor | TCGA-COAD | Alive | 337  | NA   | 30223 | 0 | 337     | 83      | male   | Stage I    | T2  | N0  | M0 |
| TCGA-A6-6649-01A-11R-1774-07 | TCGA-A6-6649 | TCGA-A6-6649-01A | TP | Primary solid Tumor | TCGA-COAD | Alive | 735  | NA   | 24237 | 0 | 735     | 66      | male   | Stage IIIB | T3  | N1b | M0 |
| TCGA-A6-2671-01A-01R-1410-07 | TCGA-A6-2671 | TCGA-A6-2671-01A | TP | Primary solid Tumor | TCGA-COAD | Dead  | 1126 | 1331 | 31329 | 1 | 1331    | 86      | male   | Stage IV   | T3  | N2  | M1 |
| TCGA-AA-3812-01A-01R-0905-07 | TCGA-AA-3812 | TCGA-AA-3812-01A | TP | Primary solid Tumor | TCGA-COAD | Alive | 1066 | NA   | 29980 | 0 | 1066    | 82      | female | Stage IIA  | T3  | N0  | M0 |
| TCGA-A6-3807-01A-01R-1022-07 | TCGA-A6-3807 | TCGA-A6-3807-01A | TP | Primary solid Tumor | TCGA-COAD | Alive | 1054 | NA   | 19624 | 0 | 1054    | 54      | female | Stage IIIC | T3  | N2  | M0 |
| TCGA-AA-A01Q-01A-01R-A002-07 | TCGA-AA-A01Q | TCGA-AA-A01Q-01A | TP | Primary solid Tumor | TCGA-COAD | Alive | 31   | NA   | 17715 | 0 | 31      | 49      | female | Stage II   | T3  | N0  | M0 |
| TCGA-AA-3956-01A-02R-1022-07 | TCGA-AA-3956 | TCGA-AA-3956-01A | TP | Primary solid Tumor | TCGA-COAD | Alive | 1035 | NA   | 24045 | 0 | 1035    | 66      | male   | Stage IIA  | T3  | N0  | M0 |
| TCGA-A6-2681-01A-01R-1410-07 | TCGA-A6-2681 | TCGA-A6-2681-01A | TP | Primary solid Tumor | TCGA-COAD | Alive | 1387 | NA   | 26929 | 0 | 1387    | 74      | female | Stage IIA  | T3  | N0  | M0 |
| TCGA-AA-3841-01A-01R-0905-07 | TCGA-AA-3841 | TCGA-AA-3841-01A | TP | Primary solid Tumor | TCGA-COAD | Alive | 1124 | NA   | 24230 | 0 | 1124    | 66      | male   | Stage IIA  | T3  | N0  | M0 |
| TCGA-CM-4752-01A-01R-1410-07 | TCGA-CM-4752 | TCGA-CM-4752-01A | TP | Primary solid Tumor | TCGA-COAD | Alive | 396  | NA   | 21519 | 0 | 396     | 59      | male   | Stage IIA  | T3  | N0  | M0 |
| TCGA-WS-AB45-01A-11R-A41B-07 | TCGA-WS-AB45 | TCGA-WS-AB45-01A | TP | Primary solid Tumor | TCGA-COAD | Alive | 2130 | NA   | NA    | 0 | 2130    | #VALUE! | female | Stage IIA  | T3  | N0  | MX |
| TCGA-DM-A280-01A-12R-A16W-07 | TCGA-DM-A280 | TCGA-DM-A280-01A | TP | Primary solid Tumor | TCGA-COAD | Dead  | 236  | 236  | 25649 | 1 | 236     | 70      | female | Stage IIA  | T3  | N0  | M0 |
| TCGA-QG-A5Z2-01A-11R-A28H-07 | TCGA-QG-A5Z2 | TCGA-QG-A5Z2-01A | TP | Primary solid Tumor | TCGA-COAD | Alive | 952  | NA   | 22367 | 0 | 952     | 61      | male   | Stage I    | T2  | N0  | M0 |
| TCGA-AA-3496-01A-21R-1839-07 | TCGA-AA-3496 | TCGA-AA-3496-01A | TP | Primary solid Tumor | TCGA-COAD | Alive | 31   | NA   | 30438 | 0 | 31      | 83      | female | Stage II   | T3  | N0  | M0 |
| TCGA-A6-A56B-01A-31R-A28H-07 | TCGA-A6-A56B | TCGA-A6-A56B-01A | TP | Primary solid Tumor | TCGA-COAD | Dead  | 1595 | 1711 | 20903 | 1 | 1711    | 57      | male   | Stage IIIB | T3  | N1  | M0 |
| TCGA-A6-6780-01A-11R-A278-07 | TCGA-A6-6780 | TCGA-A6-6780-01A | TP | Primary solid Tumor | TCGA-COAD | Alive | 612  | NA   | 27250 | 0 | 612     | 75      | male   | Stage IIA  | T3  | N0  | MX |
| TCGA-4N-A937-01A-11R-A37K-07 | TCGA-4N-A937 | TCGA-4N-A937-01A | TP | Primary solid Tumor | TCGA-COAD | Alive | 146  | NA   | 24523 | 0 | 146     | 67      | male   | Stage IIIB | T4a | N1b | M0 |
| TCGA-AA-3930-01A-01R-1022-07 | TCGA-AA-3930 | TCGA-AA-3930-01A | TP | Primary solid Tumor | TCGA-COAD | Dead  | 0    | 61   | 24321 | 1 | 61      | 67      | male   | Stage IV   | T3  | N2  | M1 |
| TCGA-CK-6747-01A-11R-1839-07 | TCGA-CK-6747 | TCGA-CK-6747-01A | TP | Primary solid Tumor | TCGA-COAD | Alive | 820  | NA   | 32052 | 0 | 820     | 88      | female | Stage IIA  | T3  | N0  | MX |
| TCGA-CA-6715-01A-21R-1839-07 | TCGA-CA-6715 | TCGA-CA-6715-01A | TP | Primary solid Tumor | TCGA-COAD | Alive | 383  | NA   | 23075 | 0 | 383     | 63      | male   | Stage IIIB | T3  | N1  | M0 |
| TCGA-A6-3809-01B-04R-A277-07 | TCGA-A6-3809 | TCGA-A6-3809-01B | TP | Primary solid Tumor | TCGA-COAD | Alive | 996  | NA   | 26274 | 0 | 996     | 72      | female | Stage IIB  | T4  | N0  | M0 |
| TCGA-G4-6588-01A-11R-1774-07 | TCGA-G4-6588 | TCGA-G4-6588-01A | TP | Primary solid Tumor | TCGA-COAD | Alive | 796  | NA   | 21532 | 0 | 796     | 59      | female | Stage IIA  | T3  | N0  | M0 |
| TCGA-AZ-6605-01A-11R-1839-07 | TCGA-AZ-6605 | TCGA-AZ-6605-01A | TP | Primary solid Tumor | TCGA-COAD | Dead  | NA   | 159  | 28485 | 1 | 159     | 78      | male   | Stage IIIB | T4  | N1  | M0 |
| TCGA-DM-A1D4-01A-21R-A155-07 | TCGA-DM-A1D4 | TCGA-DM-A1D4-01A | TP | Primary solid Tumor | TCGA-COAD | Dead  | 2821 | 2821 | 29403 | 1 | 2821    | 81      | male   | Stage IIA  | T3  | N0  | M0 |
| TCGA-F4-6807-01A-11R-1839-07 | TCGA-F4-6807 | TCGA-F4-6807-01A | TP | Primary solid Tumor | TCGA-COAD | Alive | 1309 | NA   | 18690 | 0 | 1309    | 51      | female | Stage IIIC | T3  | N2b | M0 |
| TCGA-QG-A5YW-01A-11R-A28H-07 | TCGA-QG-A5YW | TCGA-QG-A5YW-01A | TP | Primary solid Tumor | TCGA-COAD | Alive | 896  | NA   | 20391 | 0 | 896     | 56      | female | Stage IIIC | T3  | N2b | MX |
| TCGA-CK-6748-01A-11R-1839-07 | TCGA-CK-6748 | TCGA-CK-6748-01A | TP | Primary solid Tumor | TCGA-COAD | Alive | 61   | NA   | 16529 | 0 | 61      | 45      | female | Stage IV   | T3  | N1  | M1 |
| TCGA-A6-5662-01A-01R-1653-07 | TCGA-A6-5662 | TCGA-A6-5662-01A | TP | Primary solid Tumor | TCGA-COAD | Alive | 718  | NA   | 16873 | 0 | 718     | 46      | male   | Stage IVA  | T3  | N2  | M1 |
| TCGA-CM-6163-01A-11R-1653-07 | TCGA-CM-6163 | TCGA-CM-6163-01A | TP | Primary solid Tumor | TCGA-COAD | Alive | 427  | NA   | 27150 | 0 | 427     | 74      | male   | Stage I    | T1  | N0  | M0 |
| TCGA-AA-3664-01A-01R-0905-07 | TCGA-AA-3664 | TCGA-AA-3664-01A | TP | Primary solid Tumor | TCGA-COAD | Alive | 1643 | NA   | 27363 | 0 | 1643    | 75      | female | Stage II   | T3  | N0  | M0 |
| TCGA-A6-6652-01A-11R-1774-07 | TCGA-A6-6652 | TCGA-A6-6652-01A | TP | Primary solid Tumor | TCGA-COAD | Alive | 751  | NA   | 21638 | 0 | 751     | 59      | male   | Stage IVA  | T3  | N0  | M1 |
| TCGA-D5-6538-01A-11R-1723-07 | TCGA-D5-6538 | TCGA-D5-6538-01A | TP | Primary solid Tumor | TCGA-COAD | Alive | 521  | NA   | 29194 | 0 | 521     | 80      | female | Stage IIIB | T3  | N2  | M0 |
| TCGA-CM-5860-01A-01R-1653-07 | TCGA-CM-5860 | TCGA-CM-5860-01A | TP | Primary solid Tumor | TCGA-COAD | Alive | 974  | NA   | 16344 | 0 | 974     | 45      | male   | Stage IIA  | T3  | N0  | M0 |
| TCGA-AA-A01K-01A-01R-A00A-07 | TCGA-AA-A01K | TCGA-AA-A01K-01A | TP | Primary solid Tumor | TCGA-COAD | Alive | 943  | NA   | 27029 | 0 | 943     | 74      | female | Stage IIIC | T3  | N2  | M0 |
| TCGA-5M-AATA-01A-31R-A41B-07 | TCGA-5M-AATA | TCGA-5M-AATA-01A | TP | Primary solid Tumor | TCGA-COAD | NA    | NA   | NA   | NA    | 0 | #VALUE! | NA      | NA     | NA         | NA  | NA  | NA |
| TCGA-AA-3532-01A-01R-0821-07 | TCGA-AA-3532 | TCGA-AA-3532-01A | TP | Primary solid Tumor | TCGA-COAD | Alive | 882  | NA   | 23133 | 0 | 882     | 63      | male   | Stage IIA  | T3  | N0  | M0 |
| TCGA-AA-3696-01A-01R-0905-07 | TCGA-AA-3696 | TCGA-AA-3696-01A | TP | Primary solid Tumor | TCGA-COAD | Dead  | 0    | 153  | 27667 | 1 | 153     | 76      | female | Stage IV   | T3  | N1  | M1 |
| TCGA-G4-6298-01A-11R-1723-07 | TCGA-G4-6298 | TCGA-G4-6298-01A | TP | Primary solid Tumor | TCGA-COAD | Dead  | NA   | 0    | 32872 | 1 | 0       | 90      | male   | Stage IIIB | T4a | N1  | MX |
| TCGA-AA-3681-01A-01R-0905-07 | TCGA-AA-3681 | TCGA-AA-3681-01A | TP | Primary solid Tumor | TCGA-COAD | Alive | 182  | NA   | 28399 | 0 | 182     | 78      | female | Stage III  | T3  | N1  | M0 |
| TCGA-G4-6314-01A-11R-1723-07 | TCGA-G4-6314 | TCGA-G4-6314-01A | TP | Primary solid Tumor | TCGA-COAD | Alive | 1093 | NA   | 27958 | 0 | 1093    | 77      | female | Stage IV   | T3  | N2  | M1 |
| TCGA-D5-6532-01A-11R-1723-07 | TCGA-D5-6532 | TCGA-D5-6532-01A | TP | Primary solid Tumor | TCGA-COAD | Alive | 555  | NA   | 22344 | 0 | 555     | 61      | male   | Stage IIA  | T3  | N0  | M0 |

|                              |              |                  |    |                     |           |       |      |      |       |   |      |    |        |            |     |     |     |
|------------------------------|--------------|------------------|----|---------------------|-----------|-------|------|------|-------|---|------|----|--------|------------|-----|-----|-----|
| TCGA-CM-5862-01A-01R-1653-07 | TCGA-CM-5862 | TCGA-CM-5862-01A | TP | Primary solid Tumor | TCGA-COAD | Dead  | NA   | 153  | 29493 | 1 | 153  | 81 | male   | Stage IVA  | T3  | N1a | M1a |
| TCGA-CM-5861-01A-01R-1653-07 | TCGA-CM-5861 | TCGA-CM-5861-01A | TP | Primary solid Tumor | TCGA-COAD | Alive | 457  | NA   | 23253 | 0 | 457  | 64 | female | Stage IIA  | T3  | N0  | M0  |
| TCGA-AZ-6600-11A-01R-1774-07 | TCGA-AZ-6600 | TCGA-AZ-6600-11A | NT | Solid Tissue Normal | TCGA-COAD | Dead  | NA   | 368  | 23581 | 1 | 368  | 65 | male   | Stage IV   | T4  | N1  | M1  |
| TCGA-AA-A01R-01A-21R-A083-07 | TCGA-AA-A01R | TCGA-AA-A01R-01A | TP | Primary solid Tumor | TCGA-COAD | Alive | 1065 | NA   | 17289 | 0 | 1065 | 47 | male   | Stage III  | T3  | N2  | M0  |
| TCGA-AA-3525-11A-01R-A32Z-07 | TCGA-AA-3525 | TCGA-AA-3525-11A | NT | Solid Tissue Normal | TCGA-COAD | Alive | 1    | NA   | 32871 | 0 | 1    | 90 | male   | Stage IIIB | T3  | N1  | M0  |
| TCGA-AA-3525-01A-02R-0826-07 | TCGA-AA-3525 | TCGA-AA-3525-01A | TP | Primary solid Tumor | TCGA-COAD | Alive | 1    | NA   | 32871 | 0 | 1    | 90 | male   | Stage IIIB | T3  | N1  | M0  |
| TCGA-AA-A00Z-01A-01R-A002-07 | TCGA-AA-A00Z | TCGA-AA-A00Z-01A | TP | Primary solid Tumor | TCGA-COAD | Alive | 669  | NA   | 25872 | 0 | 669  | 71 | male   | Stage IIA  | T3  | N0  | M0  |
| TCGA-A6-5659-01A-01R-A278-07 | TCGA-A6-5659 | TCGA-A6-5659-01A | TP | Primary solid Tumor | TCGA-COAD | Alive | 926  | NA   | 30028 | 0 | 926  | 82 | male   | Stage I    | T2  | N0  | M0  |
| TCGA-A6-4107-01A-02R-1410-07 | TCGA-A6-4107 | TCGA-A6-4107-01A | TP | Primary solid Tumor | TCGA-COAD | Alive | 987  | NA   | 21064 | 0 | 987  | 58 | female | Stage IIIB | T3  | N1b | M0  |
| TCGA-AZ-6598-11A-01R-1774-07 | TCGA-AZ-6598 | TCGA-AZ-6598-11A | NT | Solid Tissue Normal | TCGA-COAD | Dead  | NA   | 1503 | 28182 | 1 | 1503 | 77 | female | Stage II   | T3  | N0  | MX  |
| TCGA-AZ-6598-01A-11R-1774-07 | TCGA-AZ-6598 | TCGA-AZ-6598-01A | TP | Primary solid Tumor | TCGA-COAD | Dead  | NA   | 1503 | 28182 | 1 | 1503 | 77 | female | Stage II   | T3  | N0  | MX  |
| TCGA-AA-3845-01A-01R-1022-07 | TCGA-AA-3845 | TCGA-AA-3845-01A | TP | Primary solid Tumor | TCGA-COAD | Dead  | NA   | 0    | 31593 | 1 | 0    | 87 | female | Stage IIA  | T3  | N0  | M0  |
| TCGA-G4-6322-01A-11R-1723-07 | TCGA-G4-6322 | TCGA-G4-6322-01A | TP | Primary solid Tumor | TCGA-COAD | Alive | 792  | NA   | 23825 | 0 | 792  | 65 | male   | Stage IIIB | T3  | N1  | MX  |
| TCGA-AA-3692-01A-01R-0905-07 | TCGA-AA-3692 | TCGA-AA-3692-01A | TP | Primary solid Tumor | TCGA-COAD | Dead  | 0    | 1095 | 17167 | 1 | 1095 | 47 | female | Stage IV   | T3  | N2  | M1  |
| TCGA-AZ-4323-01A-21R-1839-07 | TCGA-AZ-4323 | TCGA-AZ-4323-01A | TP | Primary solid Tumor | TCGA-COAD | Dead  | NA   | 43   | 13755 | 1 | 43   | 38 | male   | Stage IV   | T4  | N2  | M1  |
| TCGA-A6-6781-01B-06R-A277-07 | TCGA-A6-6781 | TCGA-A6-6781-01B | TP | Primary solid Tumor | TCGA-COAD | Alive | 598  | NA   | 15842 | 0 | 598  | 43 | male   | Stage IIIC | T4b | N1b | MX  |
| TCGA-AZ-4315-01A-01R-1410-07 | TCGA-AZ-4315 | TCGA-AZ-4315-01A | TP | Primary solid Tumor | TCGA-COAD | Alive | 1776 | NA   | 22340 | 0 | 1776 | 61 | male   | Stage IIA  | T3  | N0  | M0  |
| TCGA-AA-3534-01A-01R-0821-07 | TCGA-AA-3534 | TCGA-AA-3534-01A | TP | Primary solid Tumor | TCGA-COAD | Alive | 882  | NA   | 28489 | 0 | 882  | 78 | female | Stage IIA  | T3  | N0  | M0  |
| TCGA-AA-3534-11A-01R-A32Z-07 | TCGA-AA-3534 | TCGA-AA-3534-11A | NT | Solid Tissue Normal | TCGA-COAD | Alive | 882  | NA   | 28489 | 0 | 882  | 78 | female | Stage IIA  | T3  | N0  | M0  |
| TCGA-CA-6718-01A-11R-1839-07 | TCGA-CA-6718 | TCGA-CA-6718-01A | TP | Primary solid Tumor | TCGA-COAD | Dead  | 3    | 306  | 17109 | 1 | 306  | 47 | male   | Stage IIA  | T3  | N0  | M0  |
| TCGA-G4-6295-01A-11R-1723-07 | TCGA-G4-6295 | TCGA-G4-6295-01A | TP | Primary solid Tumor | TCGA-COAD | Alive | 254  | NA   | 25758 | 0 | 254  | 71 | female | Stage II   | T3  | N0  | M0  |
| TCGA-A6-2677-01A-01R-0821-07 | TCGA-A6-2677 | TCGA-A6-2677-01A | TP | Primary solid Tumor | TCGA-COAD | Dead  | 541  | 740  | 25143 | 1 | 740  | 69 | female | Stage IIIC | T3  | N2  | M0  |
| TCGA-AD-A5EK-01A-11R-A28H-07 | TCGA-AD-A5EK | TCGA-AD-A5EK-01A | TP | Primary solid Tumor | TCGA-COAD | Alive | 500  | NA   | 18731 | 0 | 500  | 51 | male   | Stage I    | T2  | N0  | MX  |
| TCGA-AZ-4616-01A-21R-1839-07 | TCGA-AZ-4616 | TCGA-AZ-4616-01A | TP | Primary solid Tumor | TCGA-COAD | Dead  | NA   | 156  | 30043 | 1 | 156  | 82 | female | Stage IV   | T3  | N2  | M1  |
| TCGA-D5-6920-01A-11R-1928-07 | TCGA-D5-6920 | TCGA-D5-6920-01A | TP | Primary solid Tumor | TCGA-COAD | Alive | 377  | NA   | 28124 | 0 | 377  | 77 | female | Stage IIA  | T3  | N0  | M0  |
| TCGA-F4-6809-01A-11R-1839-07 | TCGA-F4-6809 | TCGA-F4-6809-01A | TP | Primary solid Tumor | TCGA-COAD | Dead  | 39   | 403  | 19039 | 1 | 403  | 52 | female | Stage IVA  | T3  | N1  | M1  |
| TCGA-AZ-6599-01A-11R-1774-07 | TCGA-AZ-6599 | TCGA-AZ-6599-01A | TP | Primary solid Tumor | TCGA-COAD | Dead  | NA   | 206  | 26438 | 1 | 206  | 72 | male   | Stage I    | T2  | N0  | MX  |
| TCGA-DM-A1DA-01A-11R-A155-07 | TCGA-DM-A1DA | TCGA-DM-A1DA-01A | TP | Primary solid Tumor | TCGA-COAD | Dead  | 228  | 228  | 26169 | 1 | 228  | 72 | female | Stage IIIC | T3  | N2  | M0  |
| TCGA-DM-A28K-01A-21R-A32Y-07 | TCGA-DM-A28K | TCGA-DM-A28K-01A | TP | Primary solid Tumor | TCGA-COAD | Alive | 2988 | NA   | 27428 | 0 | 2988 | 75 | male   | Stage IIA  | T3  | N0  | M0  |
| TCGA-A6-6782-01A-11R-1839-07 | TCGA-A6-6782 | TCGA-A6-6782-01A | TP | Primary solid Tumor | TCGA-COAD | Alive | 617  | NA   | 30012 | 0 | 617  | 82 | male   | Stage IIB  | T4a | N0  | MX  |
| TCGA-AA-3531-11A-01R-A32Z-07 | TCGA-AA-3531 | TCGA-AA-3531-11A | NT | Solid Tissue Normal | TCGA-COAD | Alive | 1035 | NA   | 27514 | 0 | 1035 | 75 | female | Stage IIA  | T3  | N0  | M0  |
| TCGA-AA-3531-01A-01R-0821-07 | TCGA-AA-3531 | TCGA-AA-3531-01A | TP | Primary solid Tumor | TCGA-COAD | Alive | 1035 | NA   | 27514 | 0 | 1035 | 75 | female | Stage IIA  | T3  | N0  | M0  |
| TCGA-A6-2674-01B-04R-A277-07 | TCGA-A6-2674 | TCGA-A6-2674-01B | TP | Primary solid Tumor | TCGA-COAD | Alive | 1331 | NA   | 26292 | 0 | 1331 | 72 | male   | Stage IV   | T3  | N2  | M1  |
| TCGA-AA-3877-01A-01R-1022-07 | TCGA-AA-3877 | TCGA-AA-3877-01A | TP | Primary solid Tumor | TCGA-COAD | Alive | 943  | NA   | 30377 | 0 | 943  | 83 | female | Stage I    | T1  | N0  | M0  |
| TCGA-NH-A6GA-01A-11R-A37K-07 | TCGA-NH-A6GA | TCGA-NH-A6GA-01A | TP | Primary solid Tumor | TCGA-COAD | Dead  | 182  | 302  | 21313 | 1 | 302  | 58 | male   | Stage IIIC | T4a | N2a | MX  |
| TCGA-AA-3986-01A-02R-1022-07 | TCGA-AA-3986 | TCGA-AA-3986-01A | TP | Primary solid Tumor | TCGA-COAD | Alive | 580  | NA   | 26967 | 0 | 580  | 74 | male   | Stage I    | T2  | N0  | M0  |
| TCGA-CK-4952-01A-01R-1723-07 | TCGA-CK-4952 | TCGA-CK-4952-01A | TP | Primary solid Tumor | TCGA-COAD | Alive | 475  | NA   | 17826 | 0 | 475  | 49 | female | Stage IIIC | T4  | N2  | M0  |
| TCGA-A6-6141-01A-11R-1774-07 | TCGA-A6-6141 | TCGA-A6-6141-01A | TP | Primary solid Tumor | TCGA-COAD | Alive | 255  | NA   | 11391 | 0 | 255  | 31 | male   | Stage IIA  | T3  | N0  | M0  |
| TCGA-G4-6625-01A-21R-1774-07 | TCGA-G4-6625 | TCGA-G4-6625-01A | TP | Primary solid Tumor | TCGA-COAD | Alive | 2792 | NA   | 28163 | 0 | 2792 | 77 | female | Stage IIA  | T3  | N0  | M0  |
| TCGA-AA-A02H-01A-01R-A089-07 | TCGA-AA-A02H | TCGA-AA-A02H-01A | TP | Primary solid Tumor | TCGA-COAD | Dead  | NA   | 61   | 27362 | 1 | 61   | 75 | female | Stage IV   | T3  | N2  | M1  |
| TCGA-CK-4948-01B-11R-1653-07 | TCGA-CK-4948 | TCGA-CK-4948-01B | TP | Primary solid Tumor | TCGA-COAD | Alive | 4502 | NA   | 16736 | 0 | 4502 | 46 | female | Stage III  | T3  | N1  | M0  |
| TCGA-AD-6964-01A-11R-1928-07 | TCGA-AD-6964 | TCGA-AD-6964-01A | TP | Primary solid Tumor | TCGA-COAD | Dead  | 23   | 331  | 21457 | 1 | 331  | 59 | male   | NA         | T4a | N2b | NA  |
| TCGA-AA-A022-01A-21R-A16W-07 | TCGA-AA-A022 | TCGA-AA-A022-01A | TP | Primary solid Tumor | TCGA-COAD | Alive | 0    | NA   | 32446 | 0 | 0    | 89 | female | Stage II   | T4  | N0  | M0  |
| TCGA-AA-3673-01A-01R-0905-07 | TCGA-AA-3673 | TCGA-AA-3673-01A | TP | Primary solid Tumor | TCGA-COAD | Alive | 1522 | NA   | 19509 | 0 | 1522 | 53 | female | Stage II   | T3  | N0  | M0  |
| TCGA-AA-3947-01A-01R-1022-07 | TCGA-AA-3947 | TCGA-AA-3947-01A | TP | Primary solid Tumor | TCGA-COAD | Alive | 1004 | NA   | 22035 | 0 | 1004 | 60 | female | Stage IIB  | T4  | N0  | M0  |
| TCGA-AA-3488-01A-01R-1410-07 | TCGA-AA-3488 | TCGA-AA-3488-01A | TP | Primary solid Tumor | TCGA-COAD | Dead  | NA   | 153  | 21519 | 1 | 153  | 59 | male   | Stage IV   | T3  | N2  | M1  |
| TCGA-AA-3970-01A-01R-1022-07 | TCGA-AA-3970 | TCGA-AA-3970-01A | TP | Primary solid Tumor | TCGA-COAD | Alive | 1096 | NA   | 23741 | 0 | 1096 | 65 | male   | Stage IIA  | T3  | N0  | M0  |
| TCGA-F4-6704-01A-11R-1839-07 | TCGA-F4-6704 | TCGA-F4-6704-01A | TP | Primary solid Tumor | TCGA-COAD | Alive | 47   | NA   | 21949 | 0 | 47   | 60 | male   | Stage IIIC | T3  | N2b | MX  |
| TCGA-AY-ABYK-01A-11R-A41B-07 | TCGA-AY-ABYK | TCGA-AY-ABYK-01A | TP | Primary solid Tumor | TCGA-COAD | Alive | 573  | NA   | 16140 | 0 | 573  | 44 | male   | Stage IVA  | T3  | N2a | M1  |
| TCGA-CM-4750-01A-01R-1410-07 | TCGA-CM-4750 | TCGA-CM-4750-01A | TP | Primary solid Tumor | TCGA-COAD | Alive | 244  | NA   | 12478 | 0 | 244  | 34 | female | Stage IIIA | T1  | N1b | M0  |
| TCGA-A6-6142-01A-11R-1774-07 | TCGA-A6-6142 | TCGA-A6-6142-01A | TP | Primary solid Tumor | TCGA-COAD | Alive | 763  | NA   | 20485 | 0 | 763  | 56 | female | Stage IVA  | T3  | N1a | M1a |
| TCGA-AA-3864-01A-01R-1022-07 | TCGA-AA-3864 | TCGA-AA-3864-01A | TP | Primary solid Tumor | TCGA-COAD | Alive | 1612 | NA   | 26237 | 0 | 1612 | 72 | male   | Stage II   | T3  | N0  | M0  |
| TCGA-AA-3870-01A-01R-1022-07 | TCGA-AA-3870 | TCGA-AA-3870-01A | TP | Primary solid Tumor | TCGA-COAD | Alive | 912  | NA   | 26086 | 0 | 912  | 71 | female | Stage IV   | T3  | N2  | M1  |
| TCGA-NH-A5IV-01A-42R-A37K-07 | TCGA-NH-A5IV | TCGA-NH-A5IV-01A | TP | Primary solid Tumor | TCGA-COAD | Alive | 0    | NA   | 32872 | 0 | 0    | 90 | female | Stage IIA  | T3  | N0  | MX  |
| TCGA-CK-5912-01A-11R-1653-07 | TCGA-CK-5912 | TCGA-CK-5912-01A | TP | Primary solid Tumor | TCGA-COAD | Dead  | 1466 | 1493 | 29938 | 1 | 1493 | 82 | male   | Stage I    | T2  | N0  | MX  |
| TCGA-AA-3667-01A-01R-0905-07 | TCGA-AA-3667 | TCGA-AA-3667-01A | TP | Primary solid Tumor | TCGA-COAD | Alive | 426  | NA   | 13302 | 0 | 426  | 36 | female | Stage I    | T2  | N0  | M0  |
| TCGA-CM-6167-01A-11R-1653-07 | TCGA-CM-6167 | TCGA-CM-6167-01A | TP | Primary solid Tumor | TCGA-COAD | Alive | 456  | NA   | 21031 | 0 | 456  | 58 | female | Stage IIIC | T3  | N2b | M0  |
| TCGA-AA-3867-01A-01R-1022-07 | TCGA-AA-3867 | TCGA-AA-3867-01A | TP | Primary solid Tumor | TCGA-COAD | Alive | 731  | NA   | 27028 | 0 | 731  | 74 | male   | Stage IV   | T3  | N2  | M1  |
| TCGA-CM-4743-01A-01R-1723-07 | TCGA-CM-4743 | TCGA-CM-4743-01A | TP | Primary solid Tumor | TCGA-COAD | Alive | 701  | NA   | 25291 | 0 | 701  | 69 | male   | Stage IIA  | T3  | N0  | M0  |
| TCGA-DM-A28M-01A-12R-A16W-07 | TCGA-DM-A28M | TCGA-DM-A28M-01A | TP | Primary solid Tumor | TCGA-COAD | Alive | 2895 | NA   | 23043 | 0 | 2895 | 63 | male   | Stage IIA  | T3  | N0  | M0  |
| TCGA-AA-3554-01A-01R-0826-07 | TCGA-AA-3554 | TCGA-AA-3554-01A | TP | Primary solid Tumor | TCGA-COAD | Alive | 546  | NA   | 22799 | 0 | 546  | 62 | female | Stage IIA  | T3  | N0  | M0  |
| TCGA-AA-3517-01A-01R-0821-07 | TCGA-AA-3517 | TCGA-AA-3517-01A | TP | Primary solid Tumor | TCGA-COAD | Alive | 1186 | NA   | 22099 | 0 | 1186 | 61 | male   | Stage IIA  | T3  | N0  | M0  |

|                              |              |                  |    |                     |           |       |      |      |       |   |      |    |        |            |     |     |     |
|------------------------------|--------------|------------------|----|---------------------|-----------|-------|------|------|-------|---|------|----|--------|------------|-----|-----|-----|
| TCGA-AA-3517-11A-01R-A32Z-07 | TCGA-AA-3517 | TCGA-AA-3517-11A | NT | Solid Tissue Normal | TCGA-COAD | Alive | 1186 | NA   | 22099 | 0 | 1186 | 61 | male   | Stage IIA  | T3  | N0  | M0  |
| TCGA-AA-3968-01A-01R-1022-07 | TCGA-AA-3968 | TCGA-AA-3968-01A | TP | Primary solid Tumor | TCGA-COAD | Alive | 669  | NA   | 20089 | 0 | 669  | 55 | female | Stage I    | T2  | N0  | M0  |
| TCGA-AA-3697-11A-01R-1723-07 | TCGA-AA-3697 | TCGA-AA-3697-11A | NT | Solid Tissue Normal | TCGA-COAD | Alive | 2587 | NA   | 28367 | 0 | 2587 | 78 | male   | Stage II   | T3  | N0  | M0  |
| TCGA-AA-3516-11A-01R-A32Z-07 | TCGA-AA-3516 | TCGA-AA-3516-11A | NT | Solid Tissue Normal | TCGA-COAD | Dead  | 0    | 396  | 27303 | 1 | 396  | 75 | female | Stage III  | T3  | N2  | M0  |
| TCGA-AA-3949-01A-01R-1022-07 | TCGA-AA-3949 | TCGA-AA-3949-01A | TP | Primary solid Tumor | TCGA-COAD | Alive | 791  | NA   | 32081 | 0 | 791  | 88 | female | Stage IIIB | T3  | N1  | M0  |
| TCGA-A6-5657-01A-01R-A32Z-07 | TCGA-A6-5657 | TCGA-A6-5657-01A | TP | Primary solid Tumor | TCGA-COAD | Alive | 962  | NA   | 23920 | 0 | 962  | 66 | male   | Stage IIIB | T3  | N1  | M0  |
| TCGA-G4-6309-01A-21R-1839-07 | TCGA-G4-6309 | TCGA-G4-6309-01A | TP | Primary solid Tumor | TCGA-COAD | Alive | 2600 | NA   | 14729 | 0 | 2600 | 40 | female | Stage IIIB | T3  | N1  | M0  |
| TCGA-A6-5664-01A-21R-1839-07 | TCGA-A6-5664 | TCGA-A6-5664-01A | TP | Primary solid Tumor | TCGA-COAD | Alive | 672  | NA   | 29426 | 0 | 672  | 81 | male   | Stage IIIC | T4a | N2a | MX  |
| TCGA-CM-6162-01A-11R-1653-07 | TCGA-CM-6162 | TCGA-CM-6162-01A | TP | Primary solid Tumor | TCGA-COAD | Alive | 365  | NA   | 17624 | 0 | 365  | 48 | female | Stage IIIB | T3  | N1a | M0  |
| TCGA-AA-3814-01A-01R-0905-07 | TCGA-AA-3814 | TCGA-AA-3814-01A | TP | Primary solid Tumor | TCGA-COAD | Alive | 0    | NA   | 31380 | 0 | 0    | 86 | female | Stage IIA  | T3  | N0  | M0  |
| TCGA-AA-3680-01A-01R-0905-07 | TCGA-AA-3680 | TCGA-AA-3680-01A | TP | Primary solid Tumor | TCGA-COAD | Dead  | 0    | 335  | 24655 | 1 | 335  | 68 | female | Stage IV   | T4  | N2  | M1  |
| TCGA-D5-6530-01A-11R-1723-07 | TCGA-D5-6530 | TCGA-D5-6530-01A | TP | Primary solid Tumor | TCGA-COAD | Alive | 621  | NA   | 19591 | 0 | 621  | 54 | male   | Stage I    | T2  | N0  | M0  |
| TCGA-AA-3660-11A-01R-1723-07 | TCGA-AA-3660 | TCGA-AA-3660-11A | NT | Solid Tissue Normal | TCGA-COAD | Alive | 2375 | NA   | 18932 | 0 | 2375 | 52 | female | Stage II   | T3  | N0  | M0  |
| TCGA-AA-3556-01A-01R-0821-07 | TCGA-AA-3556 | TCGA-AA-3556-01A | TP | Primary solid Tumor | TCGA-COAD | Alive | 700  | NA   | 28704 | 0 | 700  | 79 | male   | Stage I    | T2  | N0  | M0  |
| TCGA-CM-6165-01A-11R-1653-07 | TCGA-CM-6165 | TCGA-CM-6165-01A | TP | Primary solid Tumor | TCGA-COAD | Alive | 488  | NA   | 27302 | 0 | 488  | 75 | male   | Stage IIA  | T3  | N0  | M0  |
| TCGA-AA-3710-01A-01R-1022-07 | TCGA-AA-3710 | TCGA-AA-3710-01A | TP | Primary solid Tumor | TCGA-COAD | Alive | 821  | NA   | 29465 | 0 | 821  | 81 | female | Stage IIA  | T3  | N0  | M0  |
| TCGA-D5-6533-01A-11R-1723-07 | TCGA-D5-6533 | TCGA-D5-6533-01A | TP | Primary solid Tumor | TCGA-COAD | Alive | 775  | NA   | 24971 | 0 | 775  | 68 | female | NA         | T4b | N0  | M0  |
| TCGA-AA-3818-01A-01R-0905-07 | TCGA-AA-3818 | TCGA-AA-3818-01A | TP | Primary solid Tumor | TCGA-COAD | Dead  | NA   | 30   | 28763 | 1 | 30   | 79 | female | Stage IIA  | T3  | N0  | M0  |
| TCGA-AA-A00W-01A-01R-A00Z-07 | TCGA-AA-A00W | TCGA-AA-A00W-01A | TP | Primary solid Tumor | TCGA-COAD | Alive | 456  | NA   | 29311 | 0 | 456  | 80 | male   | Stage I    | T1  | N0  | M0  |
| TCGA-A6-2680-11A-01R-A32Z-07 | TCGA-A6-2680 | TCGA-A6-2680-11A | NT | Solid Tissue Normal | TCGA-COAD | Alive | 1068 | NA   | 26533 | 0 | 1068 | 73 | female | Stage II   | T3  | N0  | M0  |
| TCGA-A6-2680-01A-01R-1410-07 | TCGA-A6-2680 | TCGA-A6-2680-01A | TP | Primary solid Tumor | TCGA-COAD | Alive | 1068 | NA   | 26533 | 0 | 1068 | 73 | female | Stage II   | T3  | N0  | M0  |
| TCGA-DM-A1D7-01A-11R-A155-07 | TCGA-DM-A1D7 | TCGA-DM-A1D7-01A | TP | Primary solid Tumor | TCGA-COAD | Dead  | 405  | 405  | 30142 | 1 | 405  | 83 | male   | Stage IIA  | T3  | N0  | M0  |
| TCGA-DM-A28G-01A-11R-A16W-07 | TCGA-DM-A28G | TCGA-DM-A28G-01A | TP | Primary solid Tumor | TCGA-COAD | Dead  | 1849 | 1849 | 27641 | 1 | 1849 | 76 | male   | Stage IIA  | T3  | N0  | M0  |
| TCGA-A6-2683-01A-01R-0821-07 | TCGA-A6-2683 | TCGA-A6-2683-01A | TP | Primary solid Tumor | TCGA-COAD | Dead  | 472  | 504  | 20871 | 1 | 504  | 57 | female | Stage IV   | T4  | N0  | M1  |
| TCGA-G4-6320-01A-11R-1723-07 | TCGA-G4-6320 | TCGA-G4-6320-01A | TP | Primary solid Tumor | TCGA-COAD | Alive | 804  | NA   | 26840 | 0 | 804  | 74 | male   | Stage III  | T3  | N1  | MX  |
| TCGA-AA-3549-01A-02R-0821-07 | TCGA-AA-3549 | TCGA-AA-3549-01A | TP | Primary solid Tumor | TCGA-COAD | Alive | 639  | NA   | 25415 | 0 | 639  | 70 | male   | Stage I    | T2  | N0  | M0  |
| TCGA-AA-3685-01A-02R-A32Z-07 | TCGA-AA-3685 | TCGA-AA-3685-01A | TP | Primary solid Tumor | TCGA-COAD | Alive | 1127 | NA   | 25506 | 0 | 1127 | 70 | male   | Stage II   | T3  | N0  | M0  |
| TCGA-DM-A282-01A-12R-A16W-07 | TCGA-DM-A282 | TCGA-DM-A282-01A | TP | Primary solid Tumor | TCGA-COAD | Alive | 4233 | NA   | 22265 | 0 | 4233 | 61 | female | Stage IIA  | T3  | N0  | M0  |
| TCGA-CM-6171-01A-11R-1653-07 | TCGA-CM-6171 | TCGA-CM-6171-01A | TP | Primary solid Tumor | TCGA-COAD | Alive | 427  | NA   | 28307 | 0 | 427  | 78 | female | Stage I    | T2  | N0  | M0  |
| TCGA-F4-6463-01A-11R-1723-07 | TCGA-F4-6463 | TCGA-F4-6463-01A | TP | Primary solid Tumor | TCGA-COAD | Alive | 1087 | NA   | 18804 | 0 | 1087 | 52 | male   | Stage IIA  | T3  | N0  | M0  |
| TCGA-D5-6539-01A-11R-1723-07 | TCGA-D5-6539 | TCGA-D5-6539-01A | TP | Primary solid Tumor | TCGA-COAD | Alive | 380  | NA   | 16703 | 0 | 380  | 46 | female | NA         | T3  | N0  | M0  |
| TCGA-AA-3544-01A-01R-1873-07 | TCGA-AA-3544 | TCGA-AA-3544-01A | TP | Primary solid Tumor | TCGA-COAD | Alive | 426  | NA   | 24959 | 0 | 426  | 68 | male   | Stage I    | T2  | N0  | M0  |
| TCGA-A6-2685-01A-01R-1410-07 | TCGA-A6-2685 | TCGA-A6-2685-01A | TP | Primary solid Tumor | TCGA-COAD | Alive | 1133 | NA   | 17757 | 0 | 1133 | 49 | female | Stage IIA  | T3  | N0  | M0  |
| TCGA-CM-6680-01A-11R-1839-07 | TCGA-CM-6680 | TCGA-CM-6680-01A | TP | Primary solid Tumor | TCGA-COAD | Alive | 366  | NA   | 28701 | 0 | 366  | 79 | female | Stage IIIB | T3  | N2a | M0  |
| TCGA-AA-A01T-01A-21R-A16W-07 | TCGA-AA-A01T | TCGA-AA-A01T-01A | TP | Primary solid Tumor | TCGA-COAD | Alive | 1005 | NA   | 23192 | 0 | 1005 | 64 | female | Stage III  | T3  | N1  | M0  |
| TCGA-AA-3973-01A-01R-1022-07 | TCGA-AA-3973 | TCGA-AA-3973-01A | TP | Primary solid Tumor | TCGA-COAD | Alive | 397  | NA   | 25536 | 0 | 397  | 70 | male   | Stage IV   | T4  | N1  | M1  |
| TCGA-F4-6570-01A-11R-1774-07 | TCGA-F4-6570 | TCGA-F4-6570-01A | TP | Primary solid Tumor | TCGA-COAD | Dead  | 0    | 188  | 28772 | 1 | 188  | 79 | female | Stage IIA  | T3  | N0  | M0  |
| TCGA-AA-3984-01A-02R-1022-07 | TCGA-AA-3984 | TCGA-AA-3984-01A | TP | Primary solid Tumor | TCGA-COAD | Alive | 0    | NA   | 22585 | 0 | 0    | 62 | female | Stage IIA  | T3  | N0  | M0  |
| TCGA-AD-6890-01A-11R-1928-07 | TCGA-AD-6890 | TCGA-AD-6890-01A | TP | Primary solid Tumor | TCGA-COAD | Alive | 746  | NA   | 23769 | 0 | 746  | 65 | male   | NA         | T1  | N0  | MX  |
| TCGA-AA-A01D-01A-01R-A00A-07 | TCGA-AA-A01D | TCGA-AA-A01D-01A | TP | Primary solid Tumor | TCGA-COAD | Dead  | 30   | 334  | 17318 | 1 | 334  | 47 | female | Stage IIIC | T3  | N2  | M0  |
| TCGA-AD-6899-01A-11R-1928-07 | TCGA-AD-6899 | TCGA-AD-6899-01A | TP | Primary solid Tumor | TCGA-COAD | Dead  | 48   | 176  | 30693 | 1 | 176  | 84 | male   | Stage IIIC | T4a | N2b | MX  |
| TCGA-D5-6928-01A-11R-1928-07 | TCGA-D5-6928 | TCGA-D5-6928-01A | TP | Primary solid Tumor | TCGA-COAD | Alive | 354  | NA   | 29411 | 0 | 354  | 81 | male   | Stage IIA  | T3  | N0  | M0  |
| TCGA-DM-A1D6-01A-21R-A155-07 | TCGA-DM-A1D6 | TCGA-DM-A1D6-01A | TP | Primary solid Tumor | TCGA-COAD | Dead  | 570  | 570  | 32302 | 1 | 570  | 88 | male   | Stage IIA  | T3  | N0  | M0  |
| TCGA-AA-A02F-01A-01R-A089-07 | TCGA-AA-A02F | TCGA-AA-A02F-01A | TP | Primary solid Tumor | TCGA-COAD | Alive | 1216 | NA   | 25051 | 0 | 1216 | 69 | female | Stage IV   | T3  | N1  | M1  |
| TCGA-AU-3779-01A-01R-1723-07 | TCGA-AU-3779 | TCGA-AU-3779-01A | TP | Primary solid Tumor | TCGA-COAD | Alive | 441  | NA   | 29460 | 0 | 441  | 81 | female | Stage IIA  | T3  | N0  | M0  |
| TCGA-A6-5656-01A-21R-A278-07 | TCGA-A6-5656 | TCGA-A6-5656-01A | TP | Primary solid Tumor | TCGA-COAD | Alive | 1001 | NA   | 27184 | 0 | 1001 | 74 | male   | Stage I    | T2  | N0  | M0  |
| TCGA-A6-5656-01B-02R-A277-07 | TCGA-A6-5656 | TCGA-A6-5656-01B | TP | Primary solid Tumor | TCGA-COAD | Alive | 1001 | NA   | 27184 | 0 | 1001 | 74 | male   | Stage I    | T2  | N0  | M0  |
| TCGA-D5-6536-01A-11R-1723-07 | TCGA-D5-6536 | TCGA-D5-6536-01A | TP | Primary solid Tumor | TCGA-COAD | Alive | 543  | NA   | 26890 | 0 | 543  | 74 | male   | Stage IIA  | T3  | N0  | M0  |
| TCGA-F4-6805-01A-11R-1839-07 | TCGA-F4-6805 | TCGA-F4-6805-01A | TP | Primary solid Tumor | TCGA-COAD | Alive | 1047 | NA   | 21241 | 0 | 1047 | 58 | female | Stage IIA  | T3  | N0  | M0  |
| TCGA-AA-A00N-01A-02R-A00A-07 | TCGA-AA-A00N | TCGA-AA-A00N-01A | TP | Primary solid Tumor | TCGA-COAD | Dead  | NA   | 122  | 27667 | 1 | 122  | 76 | male   | Stage IIB  | T4  | N0  | M0  |
| TCGA-AY-6197-01A-11R-1723-07 | TCGA-AY-6197 | TCGA-AY-6197-01A | TP | Primary solid Tumor | TCGA-COAD | Alive | 652  | NA   | 21957 | 0 | 652  | 60 | male   | Stage IIA  | T3  | N0  | NA  |
| TCGA-G4-6321-01A-11R-1723-07 | TCGA-G4-6321 | TCGA-G4-6321-01A | TP | Primary solid Tumor | TCGA-COAD | Alive | 672  | NA   | 21921 | 0 | 672  | 60 | female | Stage III  | T2  | N1  | MX  |
| TCGA-A6-5656-01A-21R-1839-07 | TCGA-A6-5656 | TCGA-A6-5656-01A | TP | Primary solid Tumor | TCGA-COAD | Alive | 1001 | NA   | 27184 | 0 | 1001 | 74 | male   | Stage I    | T2  | N0  | M0  |
| TCGA-DM-A28C-01A-11R-A32Y-07 | TCGA-DM-A28C | TCGA-DM-A28C-01A | TP | Primary solid Tumor | TCGA-COAD | Dead  | 2475 | 2475 | 27073 | 1 | 2475 | 74 | male   | Stage IIA  | T3  | N0  | M0  |
| TCGA-AZ-4682-01B-01R-A32Z-07 | TCGA-AZ-4682 | TCGA-AZ-4682-01B | TP | Primary solid Tumor | TCGA-COAD | Dead  | NA   | 680  | 22409 | 1 | 680  | 61 | male   | Stage IVA  | T3  | N0  | M1  |
| TCGA-AZ-6608-01A-11R-1839-07 | TCGA-AZ-6608 | TCGA-AZ-6608-01A | TP | Primary solid Tumor | TCGA-COAD | Dead  | NA   | 59   | 20094 | 1 | 59   | 55 | female | Stage IIIA | T2  | N1  | M0  |
| TCGA-AZ-6599-11A-01R-1774-07 | TCGA-AZ-6599 | TCGA-AZ-6599-11A | NT | Solid Tissue Normal | TCGA-COAD | Dead  | NA   | 206  | 26438 | 1 | 206  | 72 | male   | Stage I    | T2  | N0  | MX  |
| TCGA-CM-6675-01A-11R-1839-07 | TCGA-CM-6675 | TCGA-CM-6675-01A | TP | Primary solid Tumor | TCGA-COAD | Alive | 397  | NA   | 12935 | 0 | 397  | 35 | male   | Stage IVB  | T3  | N2b | M1b |
| TCGA-AA-3660-01A-01R-1723-07 | TCGA-AA-3660 | TCGA-AA-3660-01A | TP | Primary solid Tumor | TCGA-COAD | Alive | 2375 | NA   | 18932 | 0 | 2375 | 52 | female | Stage II   | T3  | N0  | M0  |
| TCGA-A6-2683-11A-01R-A32Z-07 | TCGA-A6-2683 | TCGA-A6-2683-11A | NT | Solid Tissue Normal | TCGA-COAD | Dead  | 472  | 504  | 20871 | 1 | 504  | 57 | female | Stage IV   | T4  | N0  | M1  |
| TCGA-D5-6531-01A-11R-1723-07 | TCGA-D5-6531 | TCGA-D5-6531-01A | TP | Primary solid Tumor | TCGA-COAD | Alive | 540  | NA   | 27633 | 0 | 540  | 76 | male   | Stage IIA  | T3  | N0  | M0  |
| TCGA-AA-3846-01A-01R-1022-07 | TCGA-AA-3846 | TCGA-AA-3846-01A | TP | Primary solid Tumor | TCGA-COAD | Alive | 518  | NA   | 27057 | 0 | 518  | 74 | female | Stage IIA  | T3  | N0  | M0  |

|                              |              |                  |    |                     |           |       |      |      |       |    |      |         |        |            |     |     |     |
|------------------------------|--------------|------------------|----|---------------------|-----------|-------|------|------|-------|----|------|---------|--------|------------|-----|-----|-----|
| TCGA-A6-2685-11A-01R-A32Z-07 | TCGA-A6-2685 | TCGA-A6-2685-11A | NT | Solid Tissue Normal | TCGA-COAD | Alive | 1133 | NA   | 17757 | 0  | 1133 | 49      | female | Stage IIA  | T3  | N0  | M0  |
| TCGA-D5-6537-01A-11R-1723-07 | TCGA-D5-6537 | TCGA-D5-6537-01A | TP | Primary solid Tumor | TCGA-COAD | Dead  | 137  | 146  | 23381 | 1  | 146  | 64      | male   | Stage IIIB | T3  | N1a | MX  |
| TCGA-A6-5661-01B-05R-2302-07 | TCGA-A6-5661 | TCGA-A6-5661-01B | TP | Primary solid Tumor | TCGA-COAD | Alive | 1020 | NA   | 29446 | 0  | 1020 | 81      | female | Stage IIA  | T3  | N0  | M0  |
| TCGA-CM-5864-01A-01R-1653-07 | TCGA-CM-5864 | TCGA-CM-5864-01A | TP | Primary solid Tumor | TCGA-COAD | Alive | 457  | NA   | 22219 | 0  | 457  | 61      | male   | Stage I    | T2  | N0  | M0  |
| TCGA-AA-3520-11A-01R-A32Z-07 | TCGA-AA-3520 | TCGA-AA-3520-11A | NT | Solid Tissue Normal | TCGA-COAD | Alive | 731  | NA   | 31531 | 0  | 731  | 86      | female | Stage II   | T3  | N0  | M0  |
| TCGA-AA-A001-01A-02R-A002-07 | TCGA-AA-A001 | TCGA-AA-A001-01A | TP | Primary solid Tumor | TCGA-COAD | Alive | 549  | NA   | 29371 | 0  | 549  | 80      | male   | Stage IIIB | T4  | N1  | M0  |
| TCGA-RU-A8FL-01A-11R-A37K-07 | TCGA-RU-A8FL | TCGA-RU-A8FL-01A | TP | Primary solid Tumor | TCGA-COAD | Alive | 1177 | NA   | 18975 | 0  | 1177 | 52      | male   | Stage IIIB | T3  | N2a | MX  |
| TCGA-D5-6929-01A-31R-1928-07 | TCGA-D5-6929 | TCGA-D5-6929-01A | TP | Primary solid Tumor | TCGA-COAD | Alive | 408  | NA   | 17919 | 0  | 408  | 49      | female | Stage IV   | T3  | N1  | M1  |
| TCGA-AA-3861-01A-01R-1022-07 | TCGA-AA-3861 | TCGA-AA-3861-01A | TP | Primary solid Tumor | TCGA-COAD | Alive | 914  | NA   | 26602 | 0  | 914  | 73      | male   | Stage IIA  | T3  | N0  | M0  |
| TCGA-AD-A5EJ-01A-11R-A28H-07 | TCGA-AD-A5EJ | TCGA-AD-A5EJ-01A | TP | Primary solid Tumor | TCGA-COAD | Alive | 0    | NA   | 27180 | 0  | 0    | 74      | female | Stage IIA  | T3  | N0  | MX  |
| TCGA-G4-6586-01A-11R-1774-07 | TCGA-G4-6586 | TCGA-G4-6586-01A | TP | Primary solid Tumor | TCGA-COAD | Alive | 1089 | NA   | 27020 | 0  | 1089 | 74      | female | Stage IIA  | T3  | N0  | M0  |
| TCGA-A6-6650-01A-11R-A278-07 | TCGA-A6-6650 | TCGA-A6-6650-01A | TP | Primary solid Tumor | TCGA-COAD | Alive | 627  | NA   | 25516 | 0  | 627  | 70      | female | Stage IIA  | T3  | N0  | M0  |
| TCGA-G4-6302-01A-11R-1723-07 | TCGA-G4-6302 | TCGA-G4-6302-01A | TP | Primary solid Tumor | TCGA-COAD | Dead  | 0    | 0    | 32872 | 1  | 0    | 90      | female | Stage IIA  | T3  | N0  | M0  |
| TCGA-A6-5661-01A-01R-1653-07 | TCGA-A6-5661 | TCGA-A6-5661-01A | TP | Primary solid Tumor | TCGA-COAD | Alive | 1020 | NA   | 29446 | 0  | 1020 | 81      | female | Stage IIA  | T3  | N0  | M0  |
| TCGA-A6-2674-01A-02R-0821-07 | TCGA-A6-2674 | TCGA-A6-2674-01A | TP | Primary solid Tumor | TCGA-COAD | Alive | 1331 | NA   | 26292 | 0  | 1331 | 72      | male   | Stage IV   | T3  | N2  | M1  |
| TCGA-A6-5665-01A-01R-1653-07 | TCGA-A6-5665 | TCGA-A6-5665-01A | TP | Primary solid Tumor | TCGA-COAD | Alive | 671  | NA   | 30915 | 0  | 671  | 85      | female | Stage IIA  | T3  | N0  | M0  |
| TCGA-A6-2684-01C-08R-A277-07 | TCGA-A6-2684 | TCGA-A6-2684-01C | TP | Primary solid Tumor | TCGA-COAD | Alive | 1127 | NA   | 27708 | 0  | 1127 | 76      | female | Stage I    | T2  | N0  | M0  |
| TCGA-A6-5665-01B-03R-2302-07 | TCGA-A6-5665 | TCGA-A6-5665-01B | TP | Primary solid Tumor | TCGA-COAD | Alive | 671  | NA   | 30915 | 0  | 671  | 85      | female | Stage IIA  | T3  | N0  | M0  |
| TCGA-AA-3862-01A-01R-1022-07 | TCGA-AA-3862 | TCGA-AA-3862-01A | TP | Primary solid Tumor | TCGA-COAD | Alive | 914  | NA   | 30163 | 0  | 914  | 83      | male   | Stage IIA  | T3  | N0  | M0  |
| TCGA-A6-2684-01A-01R-1410-07 | TCGA-A6-2684 | TCGA-A6-2684-01A | TP | Primary solid Tumor | TCGA-COAD | Alive | 1127 | NA   | 27708 | 0  | 1127 | 76      | female | Stage I    | T2  | N0  | M0  |
| TCGA-AD-6895-01A-11R-1928-07 | TCGA-AD-6895 | TCGA-AD-6895-01A | TP | Primary solid Tumor | TCGA-COAD | Alive | 763  | NA   | 30879 | 0  | 763  | 85      | male   | Stage IIIB | T3  | N1a | M0  |
| TCGA-AA-3875-01A-01R-0905-07 | TCGA-AA-3875 | TCGA-AA-3875-01A | TP | Primary solid Tumor | TCGA-COAD | Alive | 549  | NA   | 28640 | 0  | 549  | 78      | female | Stage I    | T1  | N0  | M0  |
| TCGA-NH-A8F7-01A-11R-A41B-07 | TCGA-NH-A8F7 | TCGA-NH-A8F7-01A | TP | Primary solid Tumor | TCGA-COAD | Alive | 543  | NA   | 19535 | 0  | 543  | 54      | female | Stage IIA  | T3  | N0  | MX  |
| TCGA-AA-3955-01A-02R-1022-07 | TCGA-AA-3955 | TCGA-AA-3955-01A | TP | Primary solid Tumor | TCGA-COAD | Alive | 638  | NA   | 14186 | 0  | 638  | 39      | male   | Stage IIIB | T2  | N2a | M0  |
| TCGA-A6-6653-01A-11R-1774-07 | TCGA-A6-6653 | TCGA-A6-6653-01A | TP | Primary solid Tumor | TCGA-COAD | Alive | 742  | NA   | 29996 | 0  | 742  | 82      | male   | Stage I    | T2  | N0  | M0  |
| TCGA-CA-5255-01A-11R-1839-07 | TCGA-CA-5255 | TCGA-CA-5255-01A | TP | Primary solid Tumor | TCGA-COAD | Alive | 376  | NA   | 16743 | 0  | 376  | 46      | male   | Stage IIA  | T3  | N0  | M0  |
| TCGA-NH-A8F7-06A-31R-A41B-07 | TCGA-NH-A8F7 | TCGA-NH-A8F7-06A | TP | Primary solid Tumor | TCGA-COAD | Alive | 543  | NA   | 19535 | 0  | 543  | 54      | female | Stage IIA  | T3  | N0  | MX  |
| TCGA-AA-A00F-01A-01R-A002-07 | TCGA-AA-A00F | TCGA-AA-A00F-01A | TP | Primary solid Tumor | TCGA-COAD | Alive | 1035 | NA   | 24379 | 0  | 1035 | 67      | male   | Stage IIIC | T3  | N2  | M0  |
| TCGA-AA-A020-01A-21R-A16W-07 | TCGA-AA-A020 | TCGA-AA-A020-01A | TP | Primary solid Tumor | TCGA-COAD | Alive | 28   | NA   | 30288 | 0  | 28   | 83      | male   | Stage II   | T3  | N0  | M0  |
| TCGA-AA-3852-01A-01R-0905-07 | TCGA-AA-3852 | TCGA-AA-3852-01A | TP | Primary solid Tumor | TCGA-COAD | Dead  | NA   | 0    | 32203 | 1  | 0    | 88      | male   | Stage IIA  | T3  | N0  | M0  |
| TCGA-DM-A0X9-01A-11R-A155-07 | TCGA-DM-A0X9 | TCGA-DM-A0X9-01A | TP | Primary solid Tumor | TCGA-COAD | Alive | 3641 | NA   | 26217 | 0  | 3641 | 72      | female | Stage IIA  | T3  | N0  | M0  |
| TCGA-AA-3496-11A-01R-1839-07 | TCGA-AA-3496 | TCGA-AA-3496-11A | NT | Solid Tissue Normal | TCGA-COAD | Alive | 31   | NA   | 30438 | 0  | 31   | 83      | female | Stage II   | T3  | N0  | M0  |
| TCGA-AA-A02W-01A-01R-A00A-07 | TCGA-AA-A02W | TCGA-AA-A02W-01A | TP | Primary solid Tumor | TCGA-COAD | Alive | 1247 | NA   | 26693 | 0  | 1247 | 73      | female | Stage I    | T2  | N0  | M0  |
| TCGA-AZ-6601-11A-01R-1774-07 | TCGA-AZ-6601 | TCGA-AZ-6601-11A | NT | Solid Tissue Normal | TCGA-COAD | Dead  | NA   | 3042 | 25082 | 1  | 3042 | 69      | male   | Stage II   | T3  | N0  | M0  |
| TCGA-AA-A01G-01A-01R-A002-07 | TCGA-AA-A01G | TCGA-AA-A01G-01A | TP | Primary solid Tumor | TCGA-COAD | Alive | 365  | NA   | 23133 | 0  | 365  | 63      | male   | Stage IIA  | T3  | N0  | M0  |
| TCGA-DM-A1HA-01A-11R-A155-07 | TCGA-DM-A1HA | TCGA-DM-A1HA-01A | TP | Primary solid Tumor | TCGA-COAD | Alive | 2600 | NA   | 30272 | 0  | 2600 | 83      | male   | Stage IIIC | T3  | N2  | M0  |
| TCGA-5M-AAT5-01A-21R-A41B-07 | TCGA-5M-AAT5 | TCGA-5M-AAT5-01A | TP | Primary solid Tumor | TCGA-COAD | NA    | NA   | NA   | NA    | NA | 0    | #VALUE! | NA     | NA         | NA  | NA  | NA  |
| TCGA-A6-2674-01A-02R-A278-07 | TCGA-A6-2674 | TCGA-A6-2674-01A | TP | Primary solid Tumor | TCGA-COAD | Alive | 1331 | NA   | 26292 | 0  | 1331 | 72      | male   | Stage IV   | T3  | N2  | M1  |
| TCGA-NH-A50T-01A-11R-A28H-07 | TCGA-NH-A50T | TCGA-NH-A50T-01A | TP | Primary solid Tumor | TCGA-COAD | Alive | 553  | NA   | 25089 | 0  | 553  | 69      | female | Stage IIA  | T3  | N0  | MX  |
| TCGA-AA-3494-01A-01R-1410-07 | TCGA-AA-3494 | TCGA-AA-3494-01A | TP | Primary solid Tumor | TCGA-COAD | Alive | 31   | NA   | 20089 | 0  | 31   | 55      | male   | Stage IV   | T3  | N0  | M1  |
| TCGA-CM-4747-01A-01R-1410-07 | TCGA-CM-4747 | TCGA-CM-4747-01A | TP | Primary solid Tumor | TCGA-COAD | Alive | 761  | NA   | 17198 | 0  | 761  | 47      | male   | Stage IVA  | T4a | N1b | M1a |
| TCGA-D5-6931-01A-11R-1928-07 | TCGA-D5-6931 | TCGA-D5-6931-01A | TP | Primary solid Tumor | TCGA-COAD | Alive | 365  | NA   | 28292 | 0  | 365  | 78      | male   | Stage IIIC | T4b | N2  | M0  |
| TCGA-AA-3713-01A-21R-1723-07 | TCGA-AA-3713 | TCGA-AA-3713-01A | TP | Primary solid Tumor | TCGA-COAD | Alive | 579  | NA   | 24927 | 0  | 579  | 68      | male   | Stage IV   | T3  | N0  | M1  |
| TCGA-AA-3713-11A-01R-1723-07 | TCGA-AA-3713 | TCGA-AA-3713-11A | NT | Solid Tissue Normal | TCGA-COAD | Alive | 579  | NA   | 24927 | 0  | 579  | 68      | male   | Stage IV   | T3  | N0  | M1  |
| TCGA-AZ-4681-01A-01R-1410-07 | TCGA-AZ-4681 | TCGA-AZ-4681-01A | TP | Primary solid Tumor | TCGA-COAD | Alive | 3247 | NA   | 28906 | 0  | 3247 | 79      | female | Stage IIA  | T3  | N0  | M0  |
| TCGA-G4-6297-01A-11R-1723-07 | TCGA-G4-6297 | TCGA-G4-6297-01A | TP | Primary solid Tumor | TCGA-COAD | Alive | 2506 | NA   | 20103 | 0  | 2506 | 55      | female | Stage IV   | T3  | N2  | M1  |
| TCGA-A6-6650-01A-11R-1774-07 | TCGA-A6-6650 | TCGA-A6-6650-01A | TP | Primary solid Tumor | TCGA-COAD | Alive | 627  | NA   | 25516 | 0  | 627  | 70      | female | Stage IIA  | T3  | N0  | M0  |
| TCGA-AZ-6601-01A-11R-1774-07 | TCGA-AZ-6601 | TCGA-AZ-6601-01A | TP | Primary solid Tumor | TCGA-COAD | Dead  | NA   | 3042 | 25082 | 1  | 3042 | 69      | male   | Stage II   | T3  | N0  | M0  |
| TCGA-AA-A01S-01A-21R-A083-07 | TCGA-AA-A01S | TCGA-AA-A01S-01A | TP | Primary solid Tumor | TCGA-COAD | Alive | 31   | NA   | 17257 | 0  | 31   | 47      | female | Stage III  | T3  | N1  | M0  |
| TCGA-CM-6679-01A-11R-1839-07 | TCGA-CM-6679 | TCGA-CM-6679-01A | TP | Primary solid Tumor | TCGA-COAD | Alive | 306  | NA   | 21519 | 0  | 306  | 59      | male   | Stage IIA  | T3  | N0  | M0  |
| TCGA-A6-A567-01A-31R-A28H-07 | TCGA-A6-A567 | TCGA-A6-A567-01A | TP | Primary solid Tumor | TCGA-COAD | Dead  | NA   | 1881 | 20493 | 1  | 1881 | 56      | male   | Stage IV   | T3  | N1  | M1  |
| TCGA-AA-A02J-01A-01R-A00A-07 | TCGA-AA-A02J | TCGA-AA-A02J-01A | TP | Primary solid Tumor | TCGA-COAD | Dead  | NA   | 153  | 25749 | 1  | 153  | 71      | female | Stage IV   | T3  | N0  | M1  |
| TCGA-CK-4947-01B-11R-1653-07 | TCGA-CK-4947 | TCGA-CK-4947-01B | TP | Primary solid Tumor | TCGA-COAD | Alive | 534  | NA   | 16980 | 0  | 534  | 47      | female | Stage IIIB | T4  | N1  | M0  |
| TCGA-A6-2682-11A-01R-A32Z-07 | TCGA-A6-2682 | TCGA-A6-2682-11A | NT | Solid Tissue Normal | TCGA-COAD | Dead  | NA   | 424  | 25683 | 1  | 424  | 70      | male   | Stage IV   | T4b | N1  | M1  |
| TCGA-A6-3809-01A-01R-A278-07 | TCGA-A6-3809 | TCGA-A6-3809-01A | TP | Primary solid Tumor | TCGA-COAD | Alive | 996  | NA   | 26274 | 0  | 996  | 72      | female | Stage IIB  | T4  | N0  | M0  |
| TCGA-DM-A1D8-01A-11R-A155-07 | TCGA-DM-A1D8 | TCGA-DM-A1D8-01A | TP | Primary solid Tumor | TCGA-COAD | Dead  | 383  | 383  | 18311 | 1  | 383  | 50      | female | NA         | T3  | N1  | NA  |
| TCGA-A6-5659-01B-04R-A277-07 | TCGA-A6-5659 | TCGA-A6-5659-01B | TP | Primary solid Tumor | TCGA-COAD | Alive | 926  | NA   | 30028 | 0  | 926  | 82      | male   | Stage I    | T2  | N0  | M0  |
| TCGA-A6-4105-01A-02R-1774-07 | TCGA-A6-4105 | TCGA-A6-4105-01A | TP | Primary solid Tumor | TCGA-COAD | Dead  | NA   | 442  | 29097 | 1  | 442  | 80      | male   | Stage IIA  | T3  | N0  | M0  |
| TCGA-AA-3542-01A-02R-1873-07 | TCGA-AA-3542 | TCGA-AA-3542-01A | TP | Primary solid Tumor | TCGA-COAD | Alive | 395  | NA   | 25324 | 0  | 395  | 69      | male   | Stage IIIC | T3  | N2  | M0  |
| TCGA-AA-A029-01A-01R-A00A-07 | TCGA-AA-A029 | TCGA-AA-A029-01A | TP | Primary solid Tumor | TCGA-COAD | Alive | 1581 | NA   | 24686 | 0  | 1581 | 68      | male   | Stage II   | T3  | N0  | M0  |
| TCGA-AA-3511-11A-01R-1839-07 | TCGA-AA-3511 | TCGA-AA-3511-11A | NT | Solid Tissue Normal | TCGA-COAD | Alive | 212  | NA   | 23407 | 0  | 212  | 64      | male   | Stage II   | T4  | N0  | M0  |
| TCGA-DM-A1HB-01A-21R-A180-07 | TCGA-DM-A1HB | TCGA-DM-A1HB-01A | TP | Primary solid Tumor | TCGA-COAD | Alive | 4126 | NA   | 27708 | 0  | 4126 | 76      | male   | Stage IIIB | T3  | N1  | M0  |

|                              |              |                  |    |                     |           |       |      |      |       |   |      |         |        |            |     |     |     |
|------------------------------|--------------|------------------|----|---------------------|-----------|-------|------|------|-------|---|------|---------|--------|------------|-----|-----|-----|
| TCGA-DM-A285-01A-11R-A16W-07 | TCGA-DM-A285 | TCGA-DM-A285-01A | TP | Primary solid Tumor | TCGA-COAD | Dead  | NA   | 179  | 26021 | 1 | 179  | 71      | female | Stage IV   | T3  | N2  | M1  |
| TCGA-SS-A7HO-01A-21R-A37K-07 | TCGA-SS-A7HO | TCGA-SS-A7HO-01A | TP | Primary solid Tumor | TCGA-COAD | Alive | 1829 | NA   | 16416 | 0 | 1829 | 45      | female | Stage IIB  | T4a | N0  | M0  |
| TCGA-AA-3842-01A-01R-1022-07 | TCGA-AA-3842 | TCGA-AA-3842-01A | TP | Primary solid Tumor | TCGA-COAD | Alive | 1126 | NA   | 18842 | 0 | 1126 | 52      | male   | Stage IIIA | T2  | N1  | M0  |
| TCGA-AA-A01C-01A-01R-A00A-07 | TCGA-AA-A01C | TCGA-AA-A01C-01A | TP | Primary solid Tumor | TCGA-COAD | Alive | 457  | NA   | 27729 | 0 | 457  | 76      | male   | Stage IIIA | T2  | N1  | M0  |
| TCGA-AA-3509-01A-01R-1410-07 | TCGA-AA-3509 | TCGA-AA-3509-01A | TP | Primary solid Tumor | TCGA-COAD | Alive | 1915 | NA   | 19786 | 0 | 1915 | 54      | female | Stage II   | T3  | N0  | M0  |
| TCGA-AA-3939-01A-01R-1022-07 | TCGA-AA-3939 | TCGA-AA-3939-01A | TP | Primary solid Tumor | TCGA-COAD | Alive | 395  | NA   | 30439 | 0 | 395  | 83      | male   | Stage IIA  | T3  | N0  | M0  |
| TCGA-T9-A92H-01A-11R-A37K-07 | TCGA-T9-A92H | TCGA-T9-A92H-01A | TP | Primary solid Tumor | TCGA-COAD | Alive | 362  | NA   | 30058 | 0 | 362  | 82      | male   | Stage IIA  | T3  | N0  | M0  |
| TCGA-DM-A28E-01A-11R-A32Y-07 | TCGA-DM-A28E | TCGA-DM-A28E-01A | TP | Primary solid Tumor | TCGA-COAD | Alive | 3648 | NA   | 26602 | 0 | 3648 | 73      | female | Stage IIA  | T3  | N0  | M0  |
| TCGA-CM-6169-01A-11R-1653-07 | TCGA-CM-6169 | TCGA-CM-6169-01A | TP | Primary solid Tumor | TCGA-COAD | Alive | 396  | NA   | 24564 | 0 | 396  | 67      | male   | Stage IIA  | T3  | N0  | M0  |
| TCGA-AD-6889-01A-11R-1928-07 | TCGA-AD-6889 | TCGA-AD-6889-01A | TP | Primary solid Tumor | TCGA-COAD | Dead  | 2056 | 2532 | NA    | 1 | 2532 | #VALUE! | male   | Stage IIA  | T3  | N0  | M0  |
| TCGA-AA-A01I-01A-02R-A089-07 | TCGA-AA-A01I | TCGA-AA-A01I-01A | TP | Primary solid Tumor | TCGA-COAD | Alive | 943  | NA   | 27759 | 0 | 943  | 76      | male   | Stage I    | T2  | N0  | M0  |
| TCGA-4T-AA8H-01A-11R-A41B-07 | TCGA-4T-AA8H | TCGA-4T-AA8H-01A | TP | Primary solid Tumor | TCGA-COAD | Alive | 385  | NA   | 15494 | 0 | 385  | 42      | female | Stage IIA  | T3  | N0  | MX  |
| TCGA-AA-3524-01A-02R-0821-07 | TCGA-AA-3524 | TCGA-AA-3524-01A | TP | Primary solid Tumor | TCGA-COAD | Alive | 1096 | NA   | 31197 | 0 | 1096 | 85      | male   | Stage II   | T3  | N0  | M0  |
| TCGA-A6-A5ZU-01A-11R-A28H-07 | TCGA-A6-A5ZU | TCGA-A6-A5ZU-01A | TP | Primary solid Tumor | TCGA-COAD | Alive | 293  | NA   | 21554 | 0 | 293  | 59      | male   | Stage IIIB | T3  | N1  | M0  |
| TCGA-A6-5665-11A-01R-1653-07 | TCGA-A6-5665 | TCGA-A6-5665-11A | NT | Solid Tissue Normal | TCGA-COAD | Alive | 671  | NA   | 30915 | 0 | 671  | 85      | female | Stage IIA  | T3  | N0  | M0  |
| TCGA-AA-3982-01A-02R-1022-07 | TCGA-AA-3982 | TCGA-AA-3982-01A | TP | Primary solid Tumor | TCGA-COAD | Alive | 822  | NA   | 27608 | 0 | 822  | 76      | male   | Stage IIIB | T3  | N1  | M0  |
| TCGA-AZ-6603-01A-11R-1839-07 | TCGA-AZ-6603 | TCGA-AZ-6603-01A | TP | Primary solid Tumor | TCGA-COAD | Dead  | NA   | 899  | 28424 | 1 | 899  | 78      | female | NA         | T2  | N1  | MX  |
| TCGA-AZ-6603-11A-02R-1839-07 | TCGA-AZ-6603 | TCGA-AZ-6603-11A | NT | Solid Tissue Normal | TCGA-COAD | Dead  | NA   | 899  | 28424 | 1 | 899  | 78      | female | NA         | T2  | N1  | MX  |
| TCGA-CM-6164-01A-11R-1653-07 | TCGA-CM-6164 | TCGA-CM-6164-01A | TP | Primary solid Tumor | TCGA-COAD | Alive | 883  | NA   | 16802 | 0 | 883  | 46      | female | Stage IIA  | T3  | N0  | M0  |
| TCGA-CK-5914-01A-11R-1653-07 | TCGA-CK-5914 | TCGA-CK-5914-01A | TP | Primary solid Tumor | TCGA-COAD | Alive | 669  | NA   | 29586 | 0 | 669  | 81      | male   | Stage IIIB | T3  | N1  | MX  |
| TCGA-AY-4070-01A-01R-1113-07 | TCGA-AY-4070 | TCGA-AY-4070-01A | TP | Primary solid Tumor | TCGA-COAD | Dead  | NA   | 496  | 18621 | 1 | 496  | 51      | female | Stage IIIC | T3  | N2  | M0  |
| TCGA-AZ-6607-01A-11R-1839-07 | TCGA-AZ-6607 | TCGA-AZ-6607-01A | TP | Primary solid Tumor | TCGA-COAD | Dead  | NA   | 97   | 25448 | 1 | 97   | 70      | male   | Stage IV   | T4  | N2  | M1  |
| TCGA-A6-6650-01B-02R-A277-07 | TCGA-A6-6650 | TCGA-A6-6650-01B | TP | Primary solid Tumor | TCGA-COAD | Alive | 627  | NA   | 25516 | 0 | 627  | 70      | female | Stage IIA  | T3  | N0  | M0  |
| TCGA-AA-3854-01A-01R-0905-07 | TCGA-AA-3854 | TCGA-AA-3854-01A | TP | Primary solid Tumor | TCGA-COAD | Alive | 1096 | NA   | 26022 | 0 | 1096 | 71      | female | Stage I    | T2  | N0  | M0  |
| TCGA-CA-5796-01A-01R-1653-07 | TCGA-CA-5796 | TCGA-CA-5796-01A | TP | Primary solid Tumor | TCGA-COAD | Alive | 377  | NA   | 19353 | 0 | 377  | 53      | female | Stage IIA  | T3  | N0  | M0  |
| TCGA-A6-2682-01A-01R-1410-07 | TCGA-A6-2682 | TCGA-A6-2682-01A | TP | Primary solid Tumor | TCGA-COAD | Dead  | NA   | 424  | 25683 | 1 | 424  | 70      | male   | Stage IV   | T4b | N1  | M1  |
| TCGA-AZ-5403-01A-01R-1653-07 | TCGA-AZ-5403 | TCGA-AZ-5403-01A | TP | Primary solid Tumor | TCGA-COAD | Dead  | NA   | 1910 | 15983 | 1 | 1910 | 44      | male   | Stage II   | T3  | N0  | MX  |
| TCGA-A6-A566-01A-11R-A28H-07 | TCGA-A6-A566 | TCGA-A6-A566-01A | TP | Primary solid Tumor | TCGA-COAD | Dead  | NA   | 758  | 20181 | 1 | 758  | 55      | female | Stage IIIB | T4  | N1  | M0  |
| TCGA-A6-6780-01B-04R-A277-07 | TCGA-A6-6780 | TCGA-A6-6780-01B | TP | Primary solid Tumor | TCGA-COAD | Alive | 612  | NA   | 27250 | 0 | 612  | 75      | male   | Stage IIA  | T3  | N0  | MX  |
| TCGA-A6-6780-01A-11R-1839-07 | TCGA-A6-6780 | TCGA-A6-6780-01A | TP | Primary solid Tumor | TCGA-COAD | Alive | 612  | NA   | 27250 | 0 | 612  | 75      | male   | Stage IIA  | T3  | N0  | MX  |
| TCGA-AA-3492-01A-01R-1410-07 | TCGA-AA-3492 | TCGA-AA-3492-01A | TP | Primary solid Tumor | TCGA-COAD | Dead  | 0    | 1    | 32871 | 1 | 1    | 90      | female | Stage II   | T3  | N0  | M0  |
| TCGA-AA-3941-01A-01R-1022-07 | TCGA-AA-3941 | TCGA-AA-3941-01A | TP | Primary solid Tumor | TCGA-COAD | Alive | 730  | NA   | 31015 | 0 | 730  | 85      | female | Stage IVA  | T4  | N1b | M1a |
| TCGA-AA-3526-01A-02R-A32Z-07 | TCGA-AA-3526 | TCGA-AA-3526-01A | TP | Primary solid Tumor | TCGA-COAD | Alive | 580  | NA   | 21123 | 0 | 580  | 58      | male   | Stage I    | T2  | N0  | M0  |
| TCGA-AZ-6605-11A-01R-1839-07 | TCGA-AZ-6605 | TCGA-AZ-6605-11A | NT | Solid Tissue Normal | TCGA-COAD | Dead  | NA   | 159  | 28485 | 1 | 159  | 78      | male   | Stage IIIB | T4  | N1  | M0  |
| TCGA-F4-6459-01A-11R-1774-07 | TCGA-F4-6459 | TCGA-F4-6459-01A | TP | Primary solid Tumor | TCGA-COAD | Dead  | 0    | 262  | 22574 | 1 | 262  | 62      | female | Stage IIIB | T3  | N2a | M0  |
| TCGA-AA-3511-01A-21R-1839-07 | TCGA-AA-3511 | TCGA-AA-3511-01A | TP | Primary solid Tumor | TCGA-COAD | Alive | 212  | NA   | 23407 | 0 | 212  | 64      | male   | Stage II   | T4  | N0  | M0  |
| TCGA-CK-6746-01A-11R-1839-07 | TCGA-CK-6746 | TCGA-CK-6746-01A | TP | Primary solid Tumor | TCGA-COAD | Alive | 0    | NA   | 30957 | 0 | 0    | 85      | female | Stage IIB  | T4b | N0  | MX  |
| TCGA-A6-6654-01A-21R-1839-07 | TCGA-A6-6654 | TCGA-A6-6654-01A | TP | Primary solid Tumor | TCGA-COAD | Alive | 726  | NA   | 23953 | 0 | 726  | 66      | female | Stage IIIB | T3  | N1  | M0  |
| TCGA-AA-3994-01A-01R-1113-07 | TCGA-AA-3994 | TCGA-AA-3994-01A | TP | Primary solid Tumor | TCGA-COAD | Alive | 822  | NA   | 25323 | 0 | 822  | 69      | male   | Stage IIIB | T3  | N1  | M0  |
| TCGA-AA-3543-01A-01R-0826-07 | TCGA-AA-3543 | TCGA-AA-3543-01A | TP | Primary solid Tumor | TCGA-COAD | Alive | 30   | NA   | 30772 | 0 | 30   | 84      | male   | Stage I    | T2  | N0  | M0  |
| TCGA-AA-3502-01A-01R-1410-07 | TCGA-AA-3502 | TCGA-AA-3502-01A | TP | Primary solid Tumor | TCGA-COAD | Alive | 1065 | NA   | 26724 | 0 | 1065 | 73      | male   | Stage I    | T2  | N0  | M0  |
| TCGA-CA-6716-01A-11R-1839-07 | TCGA-CA-6716 | TCGA-CA-6716-01A | TP | Primary solid Tumor | TCGA-COAD | Alive | 371  | NA   | 23943 | 0 | 371  | 66      | male   | Stage IIA  | T3  | N0  | M0  |
| TCGA-A6-5659-01A-01R-1653-07 | TCGA-A6-5659 | TCGA-A6-5659-01A | TP | Primary solid Tumor | TCGA-COAD | Alive | 926  | NA   | 30028 | 0 | 926  | 82      | male   | Stage I    | T2  | N0  | M0  |
| TCGA-A6-5662-11A-01R-1653-07 | TCGA-A6-5662 | TCGA-A6-5662-11A | NT | Solid Tissue Normal | TCGA-COAD | Alive | 718  | NA   | 16873 | 0 | 718  | 46      | male   | Stage IVA  | T3  | N2  | M1  |
| TCGA-AA-3972-01A-01R-1022-07 | TCGA-AA-3972 | TCGA-AA-3972-01A | TP | Primary solid Tumor | TCGA-COAD | Alive | 1551 | NA   | 26360 | 0 | 1551 | 72      | male   | Stage IV   | T3  | N1  | M1  |
| TCGA-G4-6311-01A-11R-1723-07 | TCGA-G4-6311 | TCGA-G4-6311-01A | TP | Primary solid Tumor | TCGA-COAD | Alive | 1199 | NA   | 29297 | 0 | 1199 | 80      | male   | Stage III  | T3  | N1  | MX  |
| TCGA-A6-3809-01A-01R-1022-07 | TCGA-A6-3809 | TCGA-A6-3809-01A | TP | Primary solid Tumor | TCGA-COAD | Alive | 996  | NA   | 26274 | 0 | 996  | 72      | female | Stage IIB  | T4  | N0  | M0  |
| TCGA-A6-2676-01A-01R-0826-07 | TCGA-A6-2676 | TCGA-A6-2676-01A | TP | Primary solid Tumor | TCGA-COAD | Dead  | 711  | 1305 | 27403 | 1 | 1305 | 75      | female | Stage IIB  | T4  | N0  | M0  |
| TCGA-DM-A0XD-01A-12R-A155-07 | TCGA-DM-A0XD | TCGA-DM-A0XD-01A | TP | Primary solid Tumor | TCGA-COAD | Dead  | NA   | 743  | 23966 | 1 | 743  | 66      | male   | Stage IIA  | T3  | N0  | M0  |
| TCGA-A6-5659-11A-01R-1653-07 | TCGA-A6-5659 | TCGA-A6-5659-11A | NT | Solid Tissue Normal | TCGA-COAD | Alive | 926  | NA   | 30028 | 0 | 926  | 82      | male   | Stage I    | T2  | N0  | M0  |
| TCGA-D5-5541-01A-01R-1653-07 | TCGA-D5-5541 | TCGA-D5-5541-01A | TP | Primary solid Tumor | TCGA-COAD | Alive | 1701 | NA   | 23109 | 0 | 1701 | 63      | male   | Stage IIIB | T3  | N1a | M0  |
| TCGA-AA-3520-01A-01R-0821-07 | TCGA-AA-3520 | TCGA-AA-3520-01A | TP | Primary solid Tumor | TCGA-COAD | Alive | 731  | NA   | 31531 | 0 | 731  | 86      | female | Stage II   | T3  | N0  | M0  |
| TCGA-CM-6674-01A-11R-1839-07 | TCGA-CM-6674 | TCGA-CM-6674-01A | TP | Primary solid Tumor | TCGA-COAD | Alive | 394  | NA   | 14368 | 0 | 394  | 39      | male   | Stage IIA  | T3  | N0  | M0  |
| TCGA-AM-5821-01A-01R-1653-07 | TCGA-AM-5821 | TCGA-AM-5821-01A | TP | Primary solid Tumor | TCGA-COAD | Alive | 28   | NA   | 24903 | 0 | 28   | 68      | female | Stage IIA  | T3  | N0  | M0  |
| TCGA-F4-6856-01A-11R-1928-07 | TCGA-F4-6856 | TCGA-F4-6856-01A | TP | Primary solid Tumor | TCGA-COAD | Alive | 1074 | NA   | 16519 | 0 | 1074 | 45      | male   | Stage I    | T2  | N0  | M0  |
| TCGA-A6-6648-01A-11R-1774-07 | TCGA-A6-6648 | TCGA-A6-6648-01A | TP | Primary solid Tumor | TCGA-COAD | Alive | 766  | NA   | 20641 | 0 | 766  | 57      | male   | Stage IVA  | T3  | N0  | M1a |
| TCGA-CM-6168-01A-11R-1653-07 | TCGA-CM-6168 | TCGA-CM-6168-01A | TP | Primary solid Tumor | TCGA-COAD | Alive | 395  | NA   | 30834 | 0 | 395  | 84      | female | Stage IIA  | T3  | N0  | M0  |
| TCGA-CK-6751-01A-11R-1839-07 | TCGA-CK-6751 | TCGA-CK-6751-01A | TP | Primary solid Tumor | TCGA-COAD | Alive | 518  | NA   | 32354 | 0 | 518  | 89      | female | Stage I    | T2  | N0  | MX  |
| TCGA-AA-A00Q-01A-01R-A00Q-07 | TCGA-AA-A00Q | TCGA-AA-A00Q-01A | TP | Primary solid Tumor | TCGA-COAD | Alive | 1278 | NA   | 24199 | 0 | 1278 | 66      | female | Stage IIIB | T4  | N1  | M0  |
| TCGA-AA-A02R-01A-01R-A00A-07 | TCGA-AA-A02R | TCGA-AA-A02R-01A | TP | Primary solid Tumor | TCGA-COAD | Dead  | NA   | 670  | 30834 | 1 | 670  | 84      | female | Stage IIA  | T3  | N0  | M0  |
| TCGA-CM-5863-01A-21R-1839-07 | TCGA-CM-5863 | TCGA-CM-5863-01A | TP | Primary solid Tumor | TCGA-COAD | Alive | 457  | NA   | 22127 | 0 | 457  | 61      | female | Stage IIIB | T3  | N1b | M0  |
| TCGA-CM-4748-01A-01R-1410-07 | TCGA-CM-4748 | TCGA-CM-4748-01A | TP | Primary solid Tumor | TCGA-COAD | Alive | 792  | NA   | 19509 | 0 | 792  | 53      | male   | Stage IIIB | T4a | N1a | M0  |

|                              |              |                  |    |                     |           |       |      |      |       |   |      |    |        |            |     |     |     |
|------------------------------|--------------|------------------|----|---------------------|-----------|-------|------|------|-------|---|------|----|--------|------------|-----|-----|-----|
| TCGA-5M-AAT6-01A-11R-A41B-07 | TCGA-5M-AAT6 | TCGA-5M-AAT6-01A | TP | Primary solid Tumor | TCGA-COAD | Dead  | NA   | 290  | 14852 | 1 | 290  | 41 | female | Stage IV   | T4a | N2b | M1a |
| TCGA-G4-6317-01A-11R-1723-07 | TCGA-G4-6317 | TCGA-G4-6317-01A | TP | Primary solid Tumor | TCGA-COAD | Alive | 1095 | NA   | 18822 | 0 | 1095 | 52 | female | Stage IIIC | T3  | N2  | MX  |
| TCGA-G4-6317-02A-11R-2066-07 | TCGA-G4-6317 | TCGA-G4-6317-02A | TP | Primary solid Tumor | TCGA-COAD | Alive | 1095 | NA   | 18822 | 0 | 1095 | 52 | female | Stage IIIC | T3  | N2  | MX  |
| TCGA-AA-3672-01A-01R-0905-07 | TCGA-AA-3672 | TCGA-AA-3672-01A | TP | Primary solid Tumor | TCGA-COAD | Alive | 0    | NA   | 32872 | 0 | 0    | 90 | female | Stage III  | T3  | N1  | MO  |
| TCGA-AA-3684-01A-02R-0905-07 | TCGA-AA-3684 | TCGA-AA-3684-01A | TP | Primary solid Tumor | TCGA-COAD | Alive | 0    | NA   | 23741 | 0 | 0    | 65 | female | Stage IV   | T4  | N2  | M1  |
| TCGA-AA-3679-01A-02R-0905-07 | TCGA-AA-3679 | TCGA-AA-3679-01A | TP | Primary solid Tumor | TCGA-COAD | Alive | 457  | NA   | 21611 | 0 | 457  | 59 | male   | Stage IV   | T3  | N2  | M1  |
| TCGA-D5-6534-01A-21R-1928-07 | TCGA-D5-6534 | TCGA-D5-6534-01A | TP | Primary solid Tumor | TCGA-COAD | Alive | 1316 | NA   | 22778 | 0 | 1316 | 62 | female | Stage IIA  | T3  | N0  | MO  |
| TCGA-AA-3989-01A-01R-1022-07 | TCGA-AA-3989 | TCGA-AA-3989-01A | TP | Primary solid Tumor | TCGA-COAD | Dead  | 0    | 242  | 30712 | 1 | 242  | 84 | male   | Stage IV   | T3  | N2  | M1  |
| TCGA-AA-3662-11A-01R-1723-07 | TCGA-AA-3662 | TCGA-AA-3662-11A | NT | Solid Tissue Normal | TCGA-COAD | Alive | 184  | NA   | 29554 | 0 | 184  | 81 | female | Stage IV   | T4  | N2  | M1  |
| TCGA-AY-A54L-01A-11R-A28H-07 | TCGA-AY-A54L | TCGA-AY-A54L-01A | TP | Primary solid Tumor | TCGA-COAD | Alive | 525  | NA   | 27074 | 0 | 525  | 74 | female | Stage I    | T2  | N0  | MO  |
| TCGA-AA-3514-11A-01R-A32Z-07 | TCGA-AA-3514 | TCGA-AA-3514-11A | NT | Solid Tissue Normal | TCGA-COAD | Alive | 31   | NA   | 29738 | 0 | 31   | 81 | female | Stage I    | T2  | N0  | MO  |
| TCGA-D5-5537-01A-21R-1928-07 | TCGA-D5-5537 | TCGA-D5-5537-01A | TP | Primary solid Tumor | TCGA-COAD | Dead  | 456  | 1381 | 30505 | 1 | 1381 | 84 | male   | NA         | T3  | N2  | MX  |
| TCGA-AA-A02Y-01A-43R-A32Y-07 | TCGA-AA-A02Y | TCGA-AA-A02Y-01A | TP | Primary solid Tumor | TCGA-COAD | Alive | 1216 | NA   | 26724 | 0 | 1216 | 73 | male   | Stage I    | T2  | N0  | MO  |
| TCGA-AA-3666-01A-02R-0905-07 | TCGA-AA-3666 | TCGA-AA-3666-01A | TP | Primary solid Tumor | TCGA-COAD | Dead  | NA   | 61   | 25020 | 1 | 61   | 69 | male   | Stage III  | T3  | N1  | MO  |
| TCGA-A6-3810-01A-01R-A278-07 | TCGA-A6-3810 | TCGA-A6-3810-01A | TP | Primary solid Tumor | TCGA-COAD | Alive | 1111 | NA   | 22999 | 0 | 1111 | 63 | male   | Stage IIA  | T3  | N0  | MO  |
| TCGA-CM-4746-01A-01R-1410-07 | TCGA-CM-4746 | TCGA-CM-4746-01A | TP | Primary solid Tumor | TCGA-COAD | Alive | 1126 | NA   | 22403 | 0 | 1126 | 61 | male   | Stage I    | T2  | N0  | MO  |
| TCGA-QG-A5Z1-01A-11R-A28H-07 | TCGA-QG-A5Z1 | TCGA-QG-A5Z1-01A | TP | Primary solid Tumor | TCGA-COAD | Dead  | 202  | 256  | 26220 | 1 | 256  | 72 | male   | Stage IIIB | T3  | N1b | MX  |
| TCGA-AA-3975-01A-01R-1022-07 | TCGA-AA-3975 | TCGA-AA-3975-01A | TP | Primary solid Tumor | TCGA-COAD | Alive | 1036 | NA   | 29310 | 0 | 1036 | 80 | male   | Stage I    | T2  | N0  | MO  |
| TCGA-A6-3810-01A-01R-1022-07 | TCGA-A6-3810 | TCGA-A6-3810-01A | TP | Primary solid Tumor | TCGA-COAD | Alive | 1111 | NA   | 22999 | 0 | 1111 | 63 | male   | Stage IIA  | T3  | N0  | MO  |
| TCGA-CA-6719-01A-11R-1839-07 | TCGA-CA-6719 | TCGA-CA-6719-01A | TP | Primary solid Tumor | TCGA-COAD | Alive | 435  | NA   | 28343 | 0 | 435  | 78 | male   | Stage IIA  | T3  | N0  | MO  |
| TCGA-AA-3518-11A-01R-1672-07 | TCGA-AA-3518 | TCGA-AA-3518-11A | NT | Solid Tissue Normal | TCGA-COAD | Alive | 31   | NA   | 29769 | 0 | 31   | 82 | female | Stage IIA  | T3  | N0  | MO  |
| TCGA-AA-3678-01A-01R-0905-07 | TCGA-AA-3678 | TCGA-AA-3678-01A | TP | Primary solid Tumor | TCGA-COAD | Alive | 1430 | NA   | 22219 | 0 | 1430 | 61 | female | Stage III  | T2  | N1  | MO  |
| TCGA-A6-6781-01A-22R-A278-07 | TCGA-A6-6781 | TCGA-A6-6781-01A | TP | Primary solid Tumor | TCGA-COAD | Alive | 598  | NA   | 15842 | 0 | 598  | 43 | male   | Stage IIIC | T4b | N1b | MX  |
| TCGA-A6-2672-01A-01R-0826-07 | TCGA-A6-2672 | TCGA-A6-2672-01A | TP | Primary solid Tumor | TCGA-COAD | Alive | 1419 | NA   | 30237 | 0 | 1419 | 83 | female | Stage IIIB | T3  | N1  | MO  |
| TCGA-AA-3663-11A-01R-1723-07 | TCGA-AA-3663 | TCGA-AA-3663-11A | NT | Solid Tissue Normal | TCGA-COAD | Alive | 212  | NA   | 15675 | 0 | 212  | 43 | male   | Stage II   | T3  | N0  | MO  |
| TCGA-F4-6704-11A-01R-1839-07 | TCGA-F4-6704 | TCGA-F4-6704-11A | NT | Solid Tissue Normal | TCGA-COAD | Alive | 47   | NA   | 21949 | 0 | 47   | 60 | male   | Stage IIIC | T3  | N2b | MX  |
| TCGA-D5-6535-01A-11R-1723-07 | TCGA-D5-6535 | TCGA-D5-6535-01A | TP | Primary solid Tumor | TCGA-COAD | Alive | 460  | NA   | 29278 | 0 | 460  | 80 | female | Stage IIIB | T3  | N1  | MX  |
| TCGA-AA-3521-01A-01R-0821-07 | TCGA-AA-3521 | TCGA-AA-3521-01A | TP | Primary solid Tumor | TCGA-COAD | Alive | NA   | NA   | 31805 | 0 | 0    | 87 | male   | Stage II   | T3  | N0  | MO  |
| TCGA-DM-A28H-01A-11R-A16W-07 | TCGA-DM-A28H | TCGA-DM-A28H-01A | TP | Primary solid Tumor | TCGA-COAD | Alive | 3561 | NA   | 18325 | 0 | 3561 | 50 | male   | Stage IIIC | T3  | N2  | MO  |
| TCGA-5M-AATE-01A-11R-A41B-07 | TCGA-5M-AATE | TCGA-5M-AATE-01A | TP | Primary solid Tumor | TCGA-COAD | Alive | 1200 | NA   | 28780 | 0 | 1200 | 76 | male   | Stage IIA  | T3  | N0  | MO  |
| TCGA-AA-A017-01A-01R-A00A-07 | TCGA-AA-A017 | TCGA-AA-A017-01A | TP | Primary solid Tumor | TCGA-COAD | Alive | 457  | NA   | 21032 | 0 | 457  | 58 | female | Stage IIA  | T3  | N0  | MO  |
| TCGA-AA-3815-01A-01R-1022-07 | TCGA-AA-3815 | TCGA-AA-3815-01A | TP | Primary solid Tumor | TCGA-COAD | Alive | 1005 | NA   | 23922 | 0 | 1005 | 66 | female | Stage IIA  | T3  | N0  | MO  |
| TCGA-D5-6927-01A-21R-1928-07 | TCGA-D5-6927 | TCGA-D5-6927-01A | TP | Primary solid Tumor | TCGA-COAD | Alive | 287  | NA   | 12737 | 0 | 287  | 35 | male   | Stage IIA  | T3  | N0  | MO  |
| TCGA-AZ-5407-01A-01R-1723-07 | TCGA-AZ-5407 | TCGA-AZ-5407-01A | TP | Primary solid Tumor | TCGA-COAD | Alive | 2683 | NA   | 18820 | 0 | 2683 | 52 | female | Stage I    | T1  | N0  | MO  |
| TCGA-F4-6806-01A-11R-1839-07 | TCGA-F4-6806 | TCGA-F4-6806-01A | TP | Primary solid Tumor | TCGA-COAD | Alive | 1260 | NA   | 21625 | 0 | 1260 | 59 | female | Stage I    | T2  | N0  | MO  |
| TCGA-D5-6540-01A-11R-1723-07 | TCGA-D5-6540 | TCGA-D5-6540-01A | TP | Primary solid Tumor | TCGA-COAD | Alive | 491  | NA   | 24282 | 0 | 491  | 67 | male   | Stage I    | T2  | N0  | MO  |
| TCGA-D5-6529-01A-11R-1774-07 | TCGA-D5-6529 | TCGA-D5-6529-01A | TP | Primary solid Tumor | TCGA-COAD | Alive | 614  | NA   | 25394 | 0 | 614  | 70 | male   | Stage IIA  | T3  | N0  | MO  |
| TCGA-AA-3966-01A-01R-1113-07 | TCGA-AA-3966 | TCGA-AA-3966-01A | TP | Primary solid Tumor | TCGA-COAD | Alive | 61   | NA   | 32537 | 0 | 61   | 89 | female | Stage IIA  | T3  | N0  | MO  |
| TCGA-A6-3810-01B-04R-A277-07 | TCGA-A6-3810 | TCGA-A6-3810-01B | TP | Primary solid Tumor | TCGA-COAD | Alive | 1111 | NA   | 22999 | 0 | 1111 | 63 | male   | Stage IIA  | T3  | N0  | MO  |
| TCGA-AA-3952-01A-01R-1022-07 | TCGA-AA-3952 | TCGA-AA-3952-01A | TP | Primary solid Tumor | TCGA-COAD | Dead  | NA   | 61   | 24868 | 1 | 61   | 68 | male   | Stage IIIC | T3  | N2  | MO  |
| TCGA-CM-6170-01A-11R-1653-07 | TCGA-CM-6170 | TCGA-CM-6170-01A | TP | Primary solid Tumor | TCGA-COAD | Alive | 457  | NA   | 26663 | 0 | 457  | 73 | female | Stage I    | T2  | N0  | MO  |
| TCGA-AA-A004-01A-01R-A00A-07 | TCGA-AA-A004 | TCGA-AA-A004-01A | TP | Primary solid Tumor | TCGA-COAD | Alive | 424  | NA   | 27943 | 0 | 424  | 77 | male   | Stage IIA  | T3  | N0  | MO  |
| TCGA-AZ-4615-01A-01R-1410-07 | TCGA-AZ-4615 | TCGA-AZ-4615-01A | TP | Primary solid Tumor | TCGA-COAD | Alive | 1002 | NA   | 30908 | 0 | 1002 | 85 | male   | Stage IIIB | T3  | N1  | MO  |
| TCGA-AA-3529-01A-02R-0821-07 | TCGA-AA-3529 | TCGA-AA-3529-01A | TP | Primary solid Tumor | TCGA-COAD | Dead  | NA   | 0    | 28609 | 1 | 0    | 78 | female | Stage IIIC | T3  | N2  | MO  |
| TCGA-F4-6569-01A-11R-1774-07 | TCGA-F4-6569 | TCGA-F4-6569-01A | TP | Primary solid Tumor | TCGA-COAD | Alive | 1087 | NA   | 22203 | 0 | 1087 | 61 | male   | Stage I    | T2  | N0  | MO  |
| TCGA-NH-A50V-01A-11R-A28H-07 | TCGA-NH-A50V | TCGA-NH-A50V-01A | TP | Primary solid Tumor | TCGA-COAD | Alive | 588  | NA   | 25467 | 0 | 588  | 70 | male   | Stage IIIB | T3  | N2a | MO  |
| TCGA-AA-3950-01A-02R-1022-07 | TCGA-AA-3950 | TCGA-AA-3950-01A | TP | Primary solid Tumor | TCGA-COAD | Alive | 730  | NA   | 29130 | 0 | 730  | 80 | female | Stage IIA  | T3  | N0  | MO  |
| TCGA-CK-4950-01A-01R-1723-07 | TCGA-CK-4950 | TCGA-CK-4950-01A | TP | Primary solid Tumor | TCGA-COAD | Alive | 2599 | NA   | 24944 | 0 | 2599 | 68 | female | Stage IIIB | T3  | N1  | MO  |
| TCGA-AZ-6606-01A-11R-1839-07 | TCGA-AZ-6606 | TCGA-AZ-6606-01A | TP | Primary solid Tumor | TCGA-COAD | Dead  | NA   | 357  | 29704 | 1 | 357  | 81 | male   | Stage IV   | T4  | N2  | M1  |
| TCGA-AA-3489-01A-21R-1839-07 | TCGA-AA-3489 | TCGA-AA-3489-01A | TP | Primary solid Tumor | TCGA-COAD | Dead  | 31   | 214  | 27606 | 1 | 214  | 76 | male   | Stage II   | T3  | N0  | MO  |
| TCGA-DM-A1DB-01A-11R-A155-07 | TCGA-DM-A1DB | TCGA-DM-A1DB-01A | TP | Primary solid Tumor | TCGA-COAD | Dead  | 1348 | 1348 | 24888 | 1 | 1348 | 68 | male   | Stage IIA  | T3  | N0  | MO  |
| TCGA-A6-2677-01A-01R-A278-07 | TCGA-A6-2677 | TCGA-A6-2677-01A | TP | Primary solid Tumor | TCGA-COAD | Dead  | 541  | 740  | 25143 | 1 | 740  | 69 | female | Stage IIIC | T3  | N2  | MO  |
| TCGA-AA-A03J-01A-21R-A16W-07 | TCGA-AA-A03J | TCGA-AA-A03J-01A | TP | Primary solid Tumor | TCGA-COAD | Alive | 1246 | NA   | 23986 | 0 | 1246 | 66 | female | Stage I    | T2  | N0  | MO  |
| TCGA-AA-3860-01A-02R-0905-07 | TCGA-AA-3860 | TCGA-AA-3860-01A | TP | Primary solid Tumor | TCGA-COAD | Alive | 945  | NA   | 19449 | 0 | 945  | 53 | female | Stage IIIB | T3  | N1  | MO  |
| TCGA-AY-A69D-01A-11R-A37K-07 | TCGA-AY-A69D | TCGA-AY-A69D-01A | TP | Primary solid Tumor | TCGA-COAD | Alive | 543  | NA   | 20299 | 0 | 543  | 56 | female | Stage IIA  | T3  | N0  | MO  |
| TCGA-CM-6166-01A-11R-1653-07 | TCGA-CM-6166 | TCGA-CM-6166-01A | TP | Primary solid Tumor | TCGA-COAD | Alive | 669  | NA   | 17807 | 0 | 669  | 49 | female | Stage I    | T2  | N0  | MO  |
| TCGA-AZ-6600-01A-11R-1774-07 | TCGA-AZ-6600 | TCGA-AZ-6600-01A | TP | Primary solid Tumor | TCGA-COAD | Dead  | NA   | 368  | 23581 | 1 | 368  | 65 | male   | Stage IV   | T4  | N1  | M1  |
| TCGA-AA-3979-01A-01R-1022-07 | TCGA-AA-3979 | TCGA-AA-3979-01A | TP | Primary solid Tumor | TCGA-COAD | Alive | 730  | NA   | 30742 | 0 | 730  | 84 | male   | Stage IIA  | T3  | N0  | MO  |
| TCGA-CM-5344-01A-21R-1723-07 | TCGA-CM-5344 | TCGA-CM-5344-01A | TP | Primary solid Tumor | TCGA-COAD | Alive | 670  | NA   | 14426 | 0 | 670  | 40 | female | Stage IIIB | T3  | N1b | MO  |
| TCGA-D5-6923-01A-11R-A32Z-07 | TCGA-D5-6923 | TCGA-D5-6923-01A | TP | Primary solid Tumor | TCGA-COAD | Alive | 378  | NA   | 21118 | 0 | 378  | 58 | male   | Stage I    | T2  | N0  | MO  |
| TCGA-CM-6677-01A-11R-1839-07 | TCGA-CM-6677 | TCGA-CM-6677-01A | TP | Primary solid Tumor | TCGA-COAD | Alive | 337  | NA   | 27575 | 0 | 337  | 76 | female | Stage IIA  | T3  | N0  | MO  |
| TCGA-AA-3855-01A-01R-1022-07 | TCGA-AA-3855 | TCGA-AA-3855-01A | TP | Primary solid Tumor | TCGA-COAD | Alive | 975  | NA   | 26541 | 0 | 975  | 73 | male   | Stage I    | T2  | N0  | MO  |

|                              |              |                  |    |                     |           |       |      |      |       |   |      |    |        |            |     |     |     |
|------------------------------|--------------|------------------|----|---------------------|-----------|-------|------|------|-------|---|------|----|--------|------------|-----|-----|-----|
| TCGA-AA-3518-01A-02R-0826-07 | TCGA-AA-3518 | TCGA-AA-3518-01A | TP | Primary solid Tumor | TCGA-COAD | Alive | 31   | NA   | 29769 | 0 | 31   | 82 | female | Stage IIA  | T3  | N0  | M0  |
| TCGA-NH-A50U-01A-33R-A37K-07 | TCGA-NH-A50U | TCGA-NH-A50U-01A | TP | Primary solid Tumor | TCGA-COAD | Dead  | NA   | 334  | 15450 | 1 | 334  | 42 | male   | Stage IVA  | T4a | N0  | M1a |
| TCGA-A6-6781-01A-22R-1928-07 | TCGA-A6-6781 | TCGA-A6-6781-01A | TP | Primary solid Tumor | TCGA-COAD | Alive | 598  | NA   | 15842 | 0 | 598  | 43 | male   | Stage IIIC | T4b | N1b | MX  |
| TCGA-CK-5915-01A-11R-1653-07 | TCGA-CK-5915 | TCGA-CK-5915-01A | TP | Primary solid Tumor | TCGA-COAD | Alive | 0    | NA   | 23040 | 0 | 0    | 63 | male   | Stage I    | T2  | N0  | MX  |
| TCGA-A6-2672-01B-03R-2302-07 | TCGA-A6-2672 | TCGA-A6-2672-01B | TP | Primary solid Tumor | TCGA-COAD | Alive | 1419 | NA   | 30237 | 0 | 1419 | 83 | female | Stage IIIB | T3  | N1  | M0  |
| TCGA-DM-A28A-01A-21R-A32Y-07 | TCGA-DM-A28A | TCGA-DM-A28A-01A | TP | Primary solid Tumor | TCGA-COAD | Dead  | 805  | 805  | 28833 | 1 | 805  | 79 | male   | Stage IIIC | T3  | N2  | M0  |
| TCGA-AD-6901-01A-11R-1928-07 | TCGA-AD-6901 | TCGA-AD-6901-01A | TP | Primary solid Tumor | TCGA-COAD | Dead  | 31   | 682  | 28579 | 1 | 682  | 78 | male   | NA         | T3  | N0  | MX  |
| TCGA-AA-3663-01A-01R-1723-07 | TCGA-AA-3663 | TCGA-AA-3663-01A | TP | Primary solid Tumor | TCGA-COAD | Alive | 212  | NA   | 15675 | 0 | 212  | 43 | male   | Stage II   | T3  | N0  | M0  |
| TCGA-CM-5348-01A-21R-1723-07 | TCGA-CM-5348 | TCGA-CM-5348-01A | TP | Primary solid Tumor | TCGA-COAD | Alive | 699  | NA   | 26543 | 0 | 699  | 73 | male   | Stage IIIB | T3  | N1a | M0  |
| TCGA-QG-A5YV-01A-11R-A28H-07 | TCGA-QG-A5YV | TCGA-QG-A5YV-01A | TP | Primary solid Tumor | TCGA-COAD | Alive | 1301 | NA   | 23499 | 0 | 1301 | 64 | female | Stage IIIC | T4b | N1a | MX  |
| TCGA-AA-3489-11A-01R-1839-07 | TCGA-AA-3489 | TCGA-AA-3489-11A | NT | Solid Tissue Normal | TCGA-COAD | Dead  | 31   | 214  | 27606 | 1 | 214  | 76 | male   | Stage II   | T3  | N0  | M0  |
| TCGA-AD-6965-01A-11R-1928-07 | TCGA-AD-6965 | TCGA-AD-6965-01A | TP | Primary solid Tumor | TCGA-COAD | Alive | 805  | NA   | 22853 | 0 | 805  | 63 | male   | Stage IIIC | T4a | N2b | M0  |
| TCGA-AA-A01Z-01A-11R-A083-07 | TCGA-AA-A01Z | TCGA-AA-A01Z-01A | TP | Primary solid Tumor | TCGA-COAD | Alive | 1126 | NA   | 24990 | 0 | 1126 | 68 | male   | Stage II   | T3  | N0  | M0  |
| TCGA-AA-3715-01A-01R-0905-07 | TCGA-AA-3715 | TCGA-AA-3715-01A | TP | Primary solid Tumor | TCGA-COAD | Dead  | 30   | 579  | 28428 | 1 | 579  | 78 | male   | Stage II   | T3  | N0  | M0  |
| TCGA-AA-3811-01A-01R-1022-07 | TCGA-AA-3811 | TCGA-AA-3811-01A | TP | Primary solid Tumor | TCGA-COAD | Dead  | 30   | 306  | 30893 | 1 | 306  | 85 | female | Stage III  | T3  | N2  | M0  |
| TCGA-QL-A97D-01A-12R-A41B-07 | TCGA-QL-A97D | TCGA-QL-A97D-01A | TP | Primary solid Tumor | TCGA-COAD | Alive | 666  | NA   | 30914 | 0 | 666  | 85 | female | Stage I    | T2  | N0  | MX  |
| TCGA-D5-7000-01A-11R-A32Z-07 | TCGA-D5-7000 | TCGA-D5-7000-01A | TP | Primary solid Tumor | TCGA-COAD | Alive | 312  | NA   | 28913 | 0 | 312  | 79 | female | Stage I    | T2  | N0  | M0  |
| TCGA-DM-A1D9-01A-11R-A155-07 | TCGA-DM-A1D9 | TCGA-DM-A1D9-01A | TP | Primary solid Tumor | TCGA-COAD | Alive | 4270 | NA   | 24514 | 0 | 4270 | 67 | female | Stage IIA  | T3  | N0  | M0  |
| TCGA-AA-3514-01A-02R-0821-07 | TCGA-AA-3514 | TCGA-AA-3514-01A | TP | Primary solid Tumor | TCGA-COAD | Alive | 31   | NA   | 29738 | 0 | 31   | 81 | female | Stage I    | T2  | N0  | M0  |
| TCGA-A6-2677-01B-02R-A277-07 | TCGA-A6-2677 | TCGA-A6-2677-01B | TP | Primary solid Tumor | TCGA-COAD | Dead  | 541  | 740  | 25143 | 1 | 740  | 69 | female | Stage IIIC | T3  | N2  | M0  |
| TCGA-AY-A71X-01A-12R-A37K-07 | TCGA-AY-A71X | TCGA-AY-A71X-01A | TP | Primary solid Tumor | TCGA-COAD | Alive | 588  | NA   | 19904 | 0 | 588  | 55 | female | Stage I    | T2  | N0  | M0  |
| TCGA-AA-A024-01A-02R-A00A-07 | TCGA-AA-A024 | TCGA-AA-A024-01A | TP | Primary solid Tumor | TCGA-COAD | Dead  | 61   | 1188 | 29708 | 1 | 1188 | 81 | male   | Stage II   | T3  | N0  | M0  |
| TCGA-AA-3553-01A-01R-0821-07 | TCGA-AA-3553 | TCGA-AA-3553-01A | TP | Primary solid Tumor | TCGA-COAD | Alive | 730  | NA   | 22524 | 0 | 730  | 62 | female | Stage I    | T2  | N0  | M0  |
| TCGA-AA-3538-01A-01R-0821-07 | TCGA-AA-3538 | TCGA-AA-3538-01A | TP | Primary solid Tumor | TCGA-COAD | Alive | 791  | NA   | 19752 | 0 | 791  | 54 | female | Stage I    | T2  | N0  | M0  |
| TCGA-G4-6315-01A-11R-1723-07 | TCGA-G4-6315 | TCGA-G4-6315-01A | TP | Primary solid Tumor | TCGA-COAD | Alive | 1883 | NA   | 24174 | 0 | 1883 | 66 | male   | Stage IV   | T3  | N1  | M1  |
| TCGA-NH-A6GB-01A-11R-A37K-07 | TCGA-NH-A6GB | TCGA-NH-A6GB-01A | TP | Primary solid Tumor | TCGA-COAD | Alive | 476  | NA   | 26100 | 0 | 476  | 72 | female | Stage IIIC | T3  | N2b | MX  |
| TCGA-AA-3697-01A-01R-1723-07 | TCGA-AA-3697 | TCGA-AA-3697-01A | TP | Primary solid Tumor | TCGA-COAD | Alive | 2587 | NA   | 28367 | 0 | 2587 | 78 | male   | Stage II   | T3  | N0  | M0  |
| TCGA-AA-3516-01A-02R-0826-07 | TCGA-AA-3516 | TCGA-AA-3516-01A | TP | Primary solid Tumor | TCGA-COAD | Dead  | 0    | 396  | 27303 | 1 | 396  | 75 | female | Stage III  | T3  | N2  | M0  |
| TCGA-AZ-4684-01A-01R-1410-07 | TCGA-AZ-4684 | TCGA-AZ-4684-01A | TP | Primary solid Tumor | TCGA-COAD | Alive | 1977 | NA   | 18252 | 0 | 1977 | 50 | male   | Stage IVA  | T3  | N2  | M1  |
| TCGA-3L-AA1B-01A-11R-A37K-07 | TCGA-3L-AA1B | TCGA-3L-AA1B-01A | TP | Primary solid Tumor | TCGA-COAD | Alive | 475  | NA   | 22379 | 0 | 475  | 61 | female | Stage I    | T2  | N0  | M0  |
| TCGA-AD-6548-01A-11R-1839-07 | TCGA-AD-6548 | TCGA-AD-6548-01A | TP | Primary solid Tumor | TCGA-COAD | Alive | 650  | NA   | 29758 | 0 | 650  | 82 | female | Stage I    | T2  | N0  | M0  |
| TCGA-AA-3831-01A-01R-0905-07 | TCGA-AA-3831 | TCGA-AA-3831-01A | TP | Primary solid Tumor | TCGA-COAD | Alive | 547  | NA   | 24411 | 0 | 547  | 67 | male   | Stage IIA  | T3  | N0  | M0  |
| TCGA-DM-A0XF-01A-11R-A155-07 | TCGA-DM-A0XF | TCGA-DM-A0XF-01A | TP | Primary solid Tumor | TCGA-COAD | Dead  | NA   | 1162 | 25032 | 1 | 1162 | 69 | female | Stage IIIC | T3  | N2  | M0  |
| TCGA-D5-6924-01A-11R-1928-07 | TCGA-D5-6924 | TCGA-D5-6924-01A | TP | Primary solid Tumor | TCGA-COAD | Alive | 435  | NA   | 24964 | 0 | 435  | 68 | male   | Stage IIA  | T3  | N0  | M0  |
| TCGA-CM-4744-01A-01R-A32Z-07 | TCGA-CM-4744 | TCGA-CM-4744-01A | TP | Primary solid Tumor | TCGA-COAD | Alive | 609  | NA   | 25506 | 0 | 609  | 70 | male   | Stage I    | T2  | N0  | M0  |
| TCGA-CM-6678-01A-11R-1839-07 | TCGA-CM-6678 | TCGA-CM-6678-01A | TP | Primary solid Tumor | TCGA-COAD | Alive | 335  | NA   | 23070 | 0 | 335  | 63 | female | Stage IVA  | T4a | N1c | M1a |
| TCGA-AA-A00R-01A-01R-A002-07 | TCGA-AA-A00R | TCGA-AA-A00R-01A | TP | Primary solid Tumor | TCGA-COAD | Alive | 30   | NA   | 23528 | 0 | 30   | 64 | female | Stage I    | T2  | N0  | M0  |
| TCGA-AA-3522-11A-01R-A32Z-07 | TCGA-AA-3522 | TCGA-AA-3522-11A | NT | Solid Tissue Normal | TCGA-COAD | Alive | 1127 | NA   | 24653 | 0 | 1127 | 68 | male   | Stage IIA  | T3  | N0  | M0  |
| TCGA-AA-3522-01A-01R-0821-07 | TCGA-AA-3522 | TCGA-AA-3522-01A | TP | Primary solid Tumor | TCGA-COAD | Alive | 1127 | NA   | 24653 | 0 | 1127 | 68 | male   | Stage IIA  | T3  | N0  | M0  |
| TCGA-A6-A565-01A-31R-A28H-07 | TCGA-A6-A565 | TCGA-A6-A565-01A | TP | Primary solid Tumor | TCGA-COAD | Dead  | NA   | 494  | 12526 | 1 | 494  | 34 | female | Stage IIIC | T3  | N2  | MX  |
| TCGA-AA-3662-01A-01R-1723-07 | TCGA-AA-3662 | TCGA-AA-3662-01A | TP | Primary solid Tumor | TCGA-COAD | Alive | 184  | NA   | 29554 | 0 | 184  | 81 | female | Stage IV   | T4  | N2  | M1  |
| TCGA-CM-4751-01A-02R-1839-07 | TCGA-CM-4751 | TCGA-CM-4751-01A | TP | Primary solid Tumor | TCGA-COAD | Alive | 822  | NA   | 22891 | 0 | 822  | 63 | male   | Stage IIIB | T3  | N1b | M0  |
| TCGA-AA-3848-01A-01R-0905-07 | TCGA-AA-3848 | TCGA-AA-3848-01A | TP | Primary solid Tumor | TCGA-COAD | Dead  | 30   | 306  | 30194 | 1 | 306  | 83 | female | Stage IIIC | T3  | N2  | M0  |
| TCGA-AA-3971-01A-01R-1022-07 | TCGA-AA-3971 | TCGA-AA-3971-01A | TP | Primary solid Tumor | TCGA-COAD | Alive | 489  | NA   | 21518 | 0 | 489  | 59 | male   | Stage III  | T3  | N1  | M0  |
| TCGA-A6-5660-01A-01R-1653-07 | TCGA-A6-5660 | TCGA-A6-5660-01A | TP | Primary solid Tumor | TCGA-COAD | Alive | 888  | NA   | 26803 | 0 | 888  | 73 | male   | Stage IIIC | T3  | N2b | M0  |
| TCGA-AY-5543-01A-01R-1653-07 | TCGA-AY-5543 | TCGA-AY-5543-01A | TP | Primary solid Tumor | TCGA-COAD | Alive | 1004 | NA   | 23870 | 0 | 1004 | 65 | female | Stage IVA  | T3  | N1a | M1  |
| TCGA-AA-3530-01A-01R-1022-07 | TCGA-AA-3530 | TCGA-AA-3530-01A | TP | Primary solid Tumor | TCGA-COAD | Alive | 580  | NA   | 29402 | 0 | 580  | 81 | male   | Stage I    | T2  | N0  | M0  |
| TCGA-F4-6855-01A-11R-1928-07 | TCGA-F4-6855 | TCGA-F4-6855-01A | TP | Primary solid Tumor | TCGA-COAD | Alive | 1442 | NA   | 25890 | 0 | 1442 | 71 | female | Stage IIA  | T3  | N0  | M0  |
| TCGA-DM-A288-01A-11R-A16W-07 | TCGA-DM-A288 | TCGA-DM-A288-01A | TP | Primary solid Tumor | TCGA-COAD | Dead  | 427  | 427  | 25084 | 1 | 427  | 69 | male   | Stage IIIC | T3  | N2  | M0  |
| TCGA-G4-6310-01A-11R-1723-07 | TCGA-G4-6310 | TCGA-G4-6310-01A | TP | Primary solid Tumor | TCGA-COAD | Alive | 1935 | NA   | 25243 | 0 | 1935 | 69 | male   | Stage IIIB | T3  | N1  | M0  |
| TCGA-G4-6303-01A-11R-1774-07 | TCGA-G4-6303 | TCGA-G4-6303-01A | TP | Primary solid Tumor | TCGA-COAD | Dead  | 1882 | 2003 | 19800 | 1 | 2003 | 54 | female | Stage IV   | T3  | N1  | M1  |
| TCGA-D5-6898-01A-11R-1928-07 | TCGA-D5-6898 | TCGA-D5-6898-01A | TP | Primary solid Tumor | TCGA-COAD | Alive | 229  | NA   | 18874 | 0 | 229  | 52 | female | Stage I    | T2  | N0  | M0  |
| TCGA-A6-6140-01A-11R-1774-07 | TCGA-A6-6140 | TCGA-A6-6140-01A | TP | Primary solid Tumor | TCGA-COAD | Alive | 734  | NA   | 22835 | 0 | 734  | 63 | male   | Stage IIA  | T3  | N0  | M0  |
| TCGA-AA-3821-01A-01R-1022-07 | TCGA-AA-3821 | TCGA-AA-3821-01A | TP | Primary solid Tumor | TCGA-COAD | Alive | 31   | NA   | 29706 | 0 | 31   | 81 | female | Stage I    | T2  | N0  | M0  |
| TCGA-AA-3562-01A-02R-0821-07 | TCGA-AA-3562 | TCGA-AA-3562-01A | TP | Primary solid Tumor | TCGA-COAD | Alive | 608  | NA   | 30254 | 0 | 608  | 83 | male   | Stage IIIC | T3  | N2  | M0  |
| TCGA-G4-6323-01A-11R-1723-07 | TCGA-G4-6323 | TCGA-G4-6323-01A | TP | Primary solid Tumor | TCGA-COAD | Alive | 419  | NA   | 18334 | 0 | 419  | 50 | male   | Stage IIA  | Tis | N0  | MX  |
| TCGA-D5-6932-01A-11R-1928-07 | TCGA-D5-6932 | TCGA-D5-6932-01A | TP | Primary solid Tumor | TCGA-COAD | Alive | 346  | NA   | 25466 | 0 | 346  | 70 | male   | Stage IIA  | T3  | N0  | M0  |
| TCGA-AA-A01P-01A-21R-A083-07 | TCGA-AA-A01P | TCGA-AA-A01P-01A | TP | Primary solid Tumor | TCGA-COAD | Dead  | 0    | 1158 | 29554 | 1 | 1158 | 81 | female | Stage III  | T3  | N1  | M0  |
| TCGA-AA-3851-01A-01R-1022-07 | TCGA-AA-3851 | TCGA-AA-3851-01A | TP | Primary solid Tumor | TCGA-COAD | Alive | 1006 | NA   | 27090 | 0 | 1006 | 74 | male   | Stage IIA  | T3  | N0  | M0  |
| TCGA-G4-6293-01A-11R-1723-07 | TCGA-G4-6293 | TCGA-G4-6293-01A | TP | Primary solid Tumor | TCGA-COAD | Alive | 4051 | NA   | 18076 | 0 | 4051 | 50 | female | Stage III  | T3  | N1  | M0  |
| TCGA-CM-5349-01A-21R-1723-07 | TCGA-CM-5349 | TCGA-CM-5349-01A | TP | Primary solid Tumor | TCGA-COAD | Alive | 915  | NA   | 24867 | 0 | 915  | 68 | female | Stage IIA  | T3  | N0  | M0  |
| TCGA-AA-3527-11A-01R-A32Z-07 | TCGA-AA-3527 | TCGA-AA-3527-11A | NT | Solid Tissue Normal | TCGA-COAD | Alive | 0    | NA   | 32871 | 0 | 0    | 90 | female | Stage IIA  | T3  | N0  | M0  |

|                              |              |                  |    |                     |           |       |      |  |      |       |    |      |         |        |            |     |     |     |
|------------------------------|--------------|------------------|----|---------------------|-----------|-------|------|--|------|-------|----|------|---------|--------|------------|-----|-----|-----|
| TCGA-AA-A01F-01A-01R-A002-07 | TCGA-AA-A01F | TCGA-AA-A01F-01A | TP | Primary solid Tumor | TCGA-COAD | Alive | 974  |  | NA   | 26298 | 0  | 974  | 72      | male   | Stage IIIB | T3  | N1  | M0  |
| TCGA-D5-5539-01A-01R-1653-07 | TCGA-D5-5539 | TCGA-D5-5539-01A | TP | Primary solid Tumor | TCGA-COAD | Alive | 596  |  | NA   | 22097 | 0  | 596  | 61      | male   | Stage IIIA | T3  | N1  | M0  |
| TCGA-AA-3819-01A-01R-0905-07 | TCGA-AA-3819 | TCGA-AA-3819-01A | TP | Primary solid Tumor | TCGA-COAD | Alive | 761  |  | NA   | 15280 | 0  | 761  | 42      | female | Stage IIA  | T3  | N0  | M0  |
| TCGA-NH-A8F8-01A-72R-A41B-07 | TCGA-NH-A8F8 | TCGA-NH-A8F8-01A | TP | Primary solid Tumor | TCGA-COAD | Dead  | 167  |  | 511  | 29185 | 1  | 511  | 80      | male   | Stage IV   | T4a | N2b | M1  |
| TCGA-AA-3695-01A-01R-0905-07 | TCGA-AA-3695 | TCGA-AA-3695-01A | TP | Primary solid Tumor | TCGA-COAD | Alive | 0    |  | NA   | 23164 | 0  | 0    | 63      | female | Stage IV   | T3  | N2  | M1  |
| TCGA-AA-3850-01A-01R-1022-07 | TCGA-AA-3850 | TCGA-AA-3850-01A | TP | Primary solid Tumor | TCGA-COAD | Dead  | NA   |  | 0    | 27090 | 1  | 0    | 74      | male   | Stage I    | T2  | N0  | M0  |
| TCGA-AA-3552-01A-01R-0821-07 | TCGA-AA-3552 | TCGA-AA-3552-01A | TP | Primary solid Tumor | TCGA-COAD | Dead  | 0    |  | 396  | 31290 | 1  | 396  | 86      | male   | Stage IIIC | T3  | N2  | M0  |
| TCGA-AA-3506-01A-01R-1410-07 | TCGA-AA-3506 | TCGA-AA-3506-01A | TP | Primary solid Tumor | TCGA-COAD | Alive | 1765 |  | NA   | 28275 | 0  | 1765 | 77      | male   | Stage I    | T2  | N0  | M0  |
| TCGA-CA-6717-01A-11R-1839-07 | TCGA-CA-6717 | TCGA-CA-6717-01A | TP | Primary solid Tumor | TCGA-COAD | Alive | 388  |  | NA   | 20984 | 0  | 388  | 57      | male   | Stage IIA  | T3  | N0  | M0  |
| TCGA-5M-AAT4-01A-11R-A41B-07 | TCGA-5M-AAT4 | TCGA-5M-AAT4-01A | TP | Primary solid Tumor | TCGA-COAD | Dead  | NA   |  | 49   | 27095 | 1  | 49   | 74      | male   | Stage IV   | T3  | N0  | M1b |
| TCGA-A6-6651-01A-21R-1839-07 | TCGA-A6-6651 | TCGA-A6-6651-01A | TP | Primary solid Tumor | TCGA-COAD | Alive | 662  |  | NA   | 20110 | 0  | 662  | 55      | female | Stage IIIB | T3  | N1b | MX  |
| TCGA-AA-A00E-01A-01R-A002-07 | TCGA-AA-A00E | TCGA-AA-A00E-01A | TP | Primary solid Tumor | TCGA-COAD | Alive | 913  |  | NA   | 23741 | 0  | 913  | 65      | male   | Stage IIA  | T3  | N0  | M0  |
| TCGA-AA-3856-01A-01R-0905-07 | TCGA-AA-3856 | TCGA-AA-3856-01A | TP | Primary solid Tumor | TCGA-COAD | Alive | 30   |  | NA   | 21670 | 0  | 30   | 59      | male   | Stage IIA  | T3  | N0  | M0  |
| TCGA-AA-3976-01A-01R-1022-07 | TCGA-AA-3976 | TCGA-AA-3976-01A | TP | Primary solid Tumor | TCGA-COAD | Alive | 791  |  | NA   | 25599 | 0  | 791  | 70      | male   | Stage IIIA | T2  | N1  | M0  |
| TCGA-A6-2679-11A-01R-A32Z-07 | TCGA-A6-2679 | TCGA-A6-2679-11A | NT | Solid Tissue Normal | TCGA-COAD | Alive | 1366 |  | NA   | 26820 | 0  | 1366 | 73      | female | Stage IIB  | T3  | N0  | NA  |
| TCGA-A6-2679-01A-02R-1410-07 | TCGA-A6-2679 | TCGA-A6-2679-01A | TP | Primary solid Tumor | TCGA-COAD | Alive | 1366 |  | NA   | 26820 | 0  | 1366 | 73      | female | Stage IIB  | T3  | N0  | NA  |
| TCGA-AA-3837-01A-01R-0905-07 | TCGA-AA-3837 | TCGA-AA-3837-01A | TP | Primary solid Tumor | TCGA-COAD | Alive | 1186 |  | NA   | 24655 | 0  | 1186 | 68      | male   | Stage IIA  | T3  | N0  | M0  |
| TCGA-DM-A1D0-01A-11R-A155-07 | TCGA-DM-A1D0 | TCGA-DM-A1D0-01A | TP | Primary solid Tumor | TCGA-COAD | Alive | 3974 |  | NA   | 28875 | 0  | 3974 | 79      | female | Stage IIA  | T3  | N0  | M0  |
| TCGA-G4-6627-01A-11R-1774-07 | TCGA-G4-6627 | TCGA-G4-6627-01A | TP | Primary solid Tumor | TCGA-COAD | Alive | 2175 |  | NA   | 30697 | 0  | 2175 | 84      | male   | Stage IIA  | T3  | N0  | M0  |
| TCGA-A6-2686-01A-01R-A32Z-07 | TCGA-A6-2686 | TCGA-A6-2686-01A | TP | Primary solid Tumor | TCGA-COAD | Dead  | 488  |  | 1126 | 29623 | 1  | 1126 | 81      | female | Stage IIA  | T3  | N0  | M0  |
| TCGA-A6-5666-01A-01R-1653-07 | TCGA-A6-5666 | TCGA-A6-5666-01A | TP | Primary solid Tumor | TCGA-COAD | Alive | 995  |  | NA   | 28514 | 0  | 995  | 78      | male   | Stage IIC  | T4b | N0  | M0  |
| TCGA-AA-3833-01A-01R-0905-07 | TCGA-AA-3833 | TCGA-AA-3833-01A | TP | Primary solid Tumor | TCGA-COAD | Alive | 485  |  | NA   | 23011 | 0  | 485  | 63      | female | Stage IIA  | T3  | N0  | M0  |
| TCGA-NH-A6GC-01A-12R-A41B-07 | TCGA-NH-A6GC | TCGA-NH-A6GC-01A | TP | Primary solid Tumor | TCGA-COAD | Alive | 389  |  | NA   | 24355 | 0  | 389  | 67      | female | Stage IVB  | T4b | N1b | M1b |
| TCGA-AA-A010-01A-01R-A089-07 | TCGA-AA-A010 | TCGA-AA-A010-01A | TP | Primary solid Tumor | TCGA-COAD | Alive | 1064 |  | NA   | 16922 | 0  | 1064 | 46      | female | Stage IIB  | T4  | N0  | M0  |
| TCGA-A6-2675-11A-01R-1723-07 | TCGA-A6-2675 | TCGA-A6-2675-11A | NT | Solid Tissue Normal | TCGA-COAD | Alive | 1321 |  | NA   | 28813 | 0  | 1321 | 79      | male   | Stage IIA  | T3  | N0  | MX  |
| TCGA-A6-2675-01A-02R-1723-07 | TCGA-A6-2675 | TCGA-A6-2675-01A | TP | Primary solid Tumor | TCGA-COAD | Alive | 1321 |  | NA   | 28813 | 0  | 1321 | 79      | male   | Stage IIA  | T3  | N0  | MX  |
| TCGA-AA-A00D-01A-01R-A002-07 | TCGA-AA-A00D | TCGA-AA-A00D-01A | TP | Primary solid Tumor | TCGA-COAD | Alive | 578  |  | NA   | 25689 | 0  | 578  | 70      | male   | Stage I    | T2  | N0  | M0  |
| TCGA-AA-A00U-01A-01R-A002-07 | TCGA-AA-A00U | TCGA-AA-A00U-01A | TP | Primary solid Tumor | TCGA-COAD | Alive | 518  |  | NA   | 18263 | 0  | 518  | 50      | male   | Stage IIIB | T3  | N1  | M0  |
| TCGA-AA-A01V-01A-23R-A083-07 | TCGA-AA-A01V | TCGA-AA-A01V-01A | TP | Primary solid Tumor | TCGA-COAD | Alive | 31   |  | NA   | 21792 | 0  | 31   | 60      | male   | Stage I    | T2  | N0  | M0  |
| TCGA-AA-3519-01A-02R-0821-07 | TCGA-AA-3519 | TCGA-AA-3519-01A | TP | Primary solid Tumor | TCGA-COAD | Alive | 276  |  | NA   | 23131 | 0  | 276  | 63      | male   | Stage III  | T3  | N1  | M0  |
| TCGA-F4-6703-01A-11R-1839-07 | TCGA-F4-6703 | TCGA-F4-6703-01A | TP | Primary solid Tumor | TCGA-COAD | Alive | 1456 |  | NA   | 23644 | 0  | 1456 | 65      | male   | Stage IIA  | T3  | N0  | M0  |
| TCGA-G5-6572-01A-11R-1830-07 | TCGA-G5-6572 | TCGA-G5-6572-01A | TP | Primary solid Tumor | TCGA-READ | Dead  | NA   |  | 1432 | 20475 | 1  | 1432 | 56      | male   | NA         | NA  | NA  | NA  |
| TCGA-AG-A023-01A-01R-A00A-07 | TCGA-AG-A023 | TCGA-AG-A023-01A | TP | Primary solid Tumor | TCGA-READ | Dead  | 61   |  | 1581 | 22830 | 1  | 1581 | 63      | female | Stage IV   | T4  | N2  | M1  |
| TCGA-DC-5337-01A-01R-1660-07 | TCGA-DC-5337 | TCGA-DC-5337-01A | TP | Primary solid Tumor | TCGA-READ | Alive | 792  |  | NA   | 25202 | 0  | 792  | 69      | male   | Stage I    | T1  | N0  | M0  |
| TCGA-AF-2693-01A-02R-1736-07 | TCGA-AF-2693 | TCGA-AF-2693-01A | TP | Primary solid Tumor | TCGA-READ | Alive | 1155 |  | NA   | 27443 | 0  | 1155 | 75      | male   | Stage I    | T2  | N0  | MX  |
| TCGA-AG-3898-01A-01R-1119-07 | TCGA-AG-3898 | TCGA-AG-3898-01A | TP | Primary solid Tumor | TCGA-READ | Alive | 1461 |  | NA   | 22492 | 0  | 1461 | 62      | male   | Stage IIA  | T3  | N0  | M0  |
| TCGA-AG-3894-01A-01R-1119-07 | TCGA-AG-3894 | TCGA-AG-3894-01A | TP | Primary solid Tumor | TCGA-READ | Alive | 426  |  | NA   | 23954 | 0  | 426  | 66      | male   | Stage IIA  | T3  | N0  | M0  |
| TCGA-EI-6885-01A-11R-1928-07 | TCGA-EI-6885 | TCGA-EI-6885-01A | TP | Primary solid Tumor | TCGA-READ | Alive | 415  |  | NA   | 21140 | 0  | 415  | 58      | female | Stage IV   | T3  | N1b | M1  |
| TCGA-EI-6510-01A-11R-1736-07 | TCGA-EI-6510 | TCGA-EI-6510-01A | TP | Primary solid Tumor | TCGA-READ | Alive | 556  |  | NA   | 28328 | 0  | 556  | 78      | female | NA         | T2  | N0  | MX  |
| TCGA-F5-6810-01A-11R-1830-07 | TCGA-F5-6810 | TCGA-F5-6810-01A | TP | Primary solid Tumor | TCGA-READ | NA    | NA   |  | NA   | NA    | NA | 0    | #VALUE! | NA     | NA         | NA  | NA  | NA  |
| TCGA-AF-5654-11A-11R-1660-07 | TCGA-AF-5654 | TCGA-AF-5654-11A | NT | Solid Tissue Normal | TCGA-READ | Dead  | 257  |  | 512  | 26738 | 1  | 512  | 73      | female | Stage I    | T2  | N0  | M0  |
| TCGA-AG-3575-01A-01R-0821-07 | TCGA-AG-3575 | TCGA-AG-3575-01A | TP | Primary solid Tumor | TCGA-READ | Alive | 365  |  | NA   | 18932 | 0  | 365  | 52      | male   | Stage II   | T3  | N0  | M0  |
| TCGA-AG-3731-11A-01R-1736-07 | TCGA-AG-3731 | TCGA-AG-3731-11A | NT | Solid Tissue Normal | TCGA-READ | Alive | 1126 |  | NA   | 23923 | 0  | 1126 | 66      | male   | Stage IV   | T3  | N1  | M1  |
| TCGA-AF-6672-01A-11R-1830-07 | TCGA-AF-6672 | TCGA-AF-6672-01A | TP | Primary solid Tumor | TCGA-READ | Alive | 748  |  | NA   | 15965 | 0  | 748  | 44      | male   | Stage IV   | T4a | N2b | MX  |
| TCGA-AG-3896-01A-01R-1119-07 | TCGA-AG-3896 | TCGA-AG-3896-01A | TP | Primary solid Tumor | TCGA-READ | Alive | 31   |  | NA   | 31046 | 0  | 31   | 85      | female | Stage I    | T2  | N0  | M0  |
| TCGA-AG-A011-01A-01R-A002-07 | TCGA-AG-A011 | TCGA-AG-A011-01A | TP | Primary solid Tumor | TCGA-READ | Alive | 1126 |  | NA   | 29463 | 0  | 1126 | 81      | male   | Stage IIA  | T3  | N0  | M0  |
| TCGA-DC-6154-01A-31R-1928-07 | TCGA-DC-6154 | TCGA-DC-6154-01A | TP | Primary solid Tumor | TCGA-READ | Alive | 365  |  | NA   | 21093 | 0  | 365  | 58      | female | Stage IVA  | T4a | N2b | M1  |
| TCGA-AG-3581-01A-01R-0821-07 | TCGA-AG-3581 | TCGA-AG-3581-01A | TP | Primary solid Tumor | TCGA-READ | Alive | 215  |  | NA   | 23345 | 0  | 215  | 64      | male   | Stage I    | T2  | N0  | M0  |
| TCGA-DT-5265-01A-21R-1830-07 | TCGA-DT-5265 | TCGA-DT-5265-01A | TP | Primary solid Tumor | TCGA-READ | Alive | 384  |  | NA   | 18669 | 0  | 384  | 51      | male   | Stage II   | T3  | N0  | M0  |
| TCGA-AG-3578-01A-01R-0821-07 | TCGA-AG-3578 | TCGA-AG-3578-01A | TP | Primary solid Tumor | TCGA-READ | Alive | 974  |  | NA   | 27851 | 0  | 974  | 76      | female | Stage IIA  | T3  | N0  | M0  |
| TCGA-AG-3583-01A-01R-0821-07 | TCGA-AG-3583 | TCGA-AG-3583-01A | TP | Primary solid Tumor | TCGA-READ | Dead  | 61   |  | 610  | 24107 | 1  | 610  | 66      | male   | Stage IV   | T3  | N2  | M1  |
| TCGA-AF-5654-01A-01R-1660-07 | TCGA-AF-5654 | TCGA-AF-5654-01A | TP | Primary solid Tumor | TCGA-READ | Dead  | 257  |  | 512  | 26738 | 1  | 512  | 73      | female | Stage I    | T2  | N0  | M0  |
| TCGA-AG-A00C-01A-01R-A002-07 | TCGA-AG-A00C | TCGA-AG-A00C-01A | TP | Primary solid Tumor | TCGA-READ | Alive | 183  |  | NA   | 18201 | 0  | 183  | 50      | female | Stage IIIB | T3  | N1  | M0  |
| TCGA-DC-6155-01A-11R-1660-07 | TCGA-DC-6155 | TCGA-DC-6155-01A | TP | Primary solid Tumor | TCGA-READ | Alive | 425  |  | NA   | 11381 | 0  | 425  | 31      | female | Stage IIIA | T2  | N1b | M0  |
| TCGA-AG-A036-01A-12R-A083-07 | TCGA-AG-A036 | TCGA-AG-A036-01A | TP | Primary solid Tumor | TCGA-READ | Alive | 3562 |  | NA   | 26206 | 0  | 3562 | 72      | male   | Stage III  | T3  | N2  | M0  |
| TCGA-AF-A56K-01A-32R-A39D-07 | TCGA-AF-A56K | TCGA-AF-A56K-01A | TP | Primary solid Tumor | TCGA-READ | Alive | 2635 |  | NA   | 20527 | 0  | 2635 | 56      | male   | Stage IIA  | T3  | N0  | M0  |
| TCGA-AG-3602-01A-02R-0826-07 | TCGA-AG-3602 | TCGA-AG-3602-01A | TP | Primary solid Tumor | TCGA-READ | Alive | 0    |  | NA   | 24350 | 0  | 0    | 67      | female | Stage IIIC | T3  | N2  | M0  |
| TCGA-AH-6547-01A-11R-1830-07 | TCGA-AH-6547 | TCGA-AH-6547-01A | TP | Primary solid Tumor | TCGA-READ | Dead  | 44   |  | 76   | 29030 | 1  | 76   | 80      | female | NA         | T3  | N0  | MX  |
| TCGA-AH-6644-01A-21R-1830-07 | TCGA-AH-6644 | TCGA-AH-6644-01A | TP | Primary solid Tumor | TCGA-READ | Alive | 838  |  | NA   | 26892 | 0  | 838  | 74      | male   | NA         | T3  | NX  | MX  |
| TCGA-EI-6917-01A-11R-1928-07 | TCGA-EI-6917 | TCGA-EI-6917-01A | TP | Primary solid Tumor | TCGA-READ | Alive | 531  |  | NA   | 12113 | 0  | 531  | 33      | male   | Stage IIIA | T3  | N1  | M0  |
| TCGA-AG-3574-01A-01R-0821-07 | TCGA-AG-3574 | TCGA-AG-3574-01A | TP | Primary solid Tumor | TCGA-READ | Dead  | 0    |  | 91   | 32781 | 1  | 91   | 90      | female | Stage II   | T3  | N0  | M0  |
| TCGA-AG-A032-01A-01R-A00A-07 | TCGA-AG-A032 | TCGA-AG-A032-01A | TP | Primary solid Tumor | TCGA-READ | Alive | 1157 |  | NA   | 24865 | 0  | 1157 | 68      | male   | Stage IIIB | T3  | N1  | M0  |

|                              |              |                  |    |                     |           |       |      |      |       |       |      |      |        |            |            |     |     |    |
|------------------------------|--------------|------------------|----|---------------------|-----------|-------|------|------|-------|-------|------|------|--------|------------|------------|-----|-----|----|
| TCGA-AH-6643-11A-01R-1830-07 | TCGA-AH-6643 | TCGA-AH-6643-11A | NT | Solid Tissue Normal | TCGA-READ | Dead  | 21   |      | 1314  | 18273 | 1    | 1314 | 50     | male       | Stage IIIC | T3  | N2b | M0 |
| TCGA-CL-5918-01A-11R-1660-07 | TCGA-CL-5918 | TCGA-CL-5918-01A | TP | Primary solid Tumor | TCGA-READ | Alive | 0    | NA   | 32872 | 0     | 0    | 90   | female | Stage IIA  | T3         | N0  | MX  |    |
| TCGA-AF-2687-01A-02R-1736-07 | TCGA-AF-2687 | TCGA-AF-2687-01A | TP | Primary solid Tumor | TCGA-READ | Alive | 1427 | NA   | 21098 | 0     | 1427 | 58   | male   | Stage IIIC | T3         | N2  | M0  |    |
| TCGA-AG-3611-01A-01R-0826-07 | TCGA-AG-3611 | TCGA-AG-3611-01A | TP | Primary solid Tumor | TCGA-READ | Alive | 424  | NA   | 26420 | 0     | 424  | 72   | male   | Stage IIA  | T3         | N0  | M0  |    |
| TCGA-EI-6507-01A-11R-1736-07 | TCGA-EI-6507 | TCGA-EI-6507-01A | TP | Primary solid Tumor | TCGA-READ | Alive | 607  | NA   | 22176 | 0     | 607  | 61   | male   | Stage IIA  | T3         | N0  | M0  |    |
| TCGA-AG-3725-11A-01R-1736-07 | TCGA-AG-3725 | TCGA-AG-3725-11A | NT | Solid Tissue Normal | TCGA-READ | Alive | 0    | NA   | 32872 | 0     | 0    | 90   | female | Stage III  | T3         | N2  | M0  |    |
| TCGA-EI-6508-01A-11R-1736-07 | TCGA-EI-6508 | TCGA-EI-6508-01A | TP | Primary solid Tumor | TCGA-READ | Alive | 636  | NA   | 17827 | 0     | 636  | 49   | female | Stage IIIB | T3         | N1a | M0  |    |
| TCGA-AF-A56L-01A-31R-A39D-07 | TCGA-AF-A56L | TCGA-AF-A56L-01A | TP | Primary solid Tumor | TCGA-READ | Alive | 2007 | NA   | 17734 | 0     | 2007 | 49   | female | Stage IIIC | T3         | N2  | M0  |    |
| TCGA-AF-3400-11A-01R-A32Z-07 | TCGA-AF-3400 | TCGA-AF-3400-11A | NT | Solid Tissue Normal | TCGA-READ | Alive | 1049 | NA   | 19826 | 0     | 1049 | 54   | male   | Stage IIA  | T3         | N0  | M0  |    |
| TCGA-F5-6811-01A-11R-1830-07 | TCGA-F5-6811 | TCGA-F5-6811-01A | TP | Primary solid Tumor | TCGA-READ | Alive | 979  | NA   | 26575 | 0     | 979  | 73   | female | Stage IIA  | T3         | N0  | M0  |    |
| TCGA-EI-6511-01A-11R-1736-07 | TCGA-EI-6511 | TCGA-EI-6511-01A | TP | Primary solid Tumor | TCGA-READ | Alive | 482  | NA   | 19237 | 0     | 482  | 53   | male   | Stage IIIB | T3         | N1  | M0  |    |
| TCGA-EI-6883-01A-31R-1928-07 | TCGA-EI-6883 | TCGA-EI-6883-01A | TP | Primary solid Tumor | TCGA-READ | Alive | 350  | NA   | 23268 | 0     | 350  | 64   | male   | Stage IIC  | T3         | N0  | M0  |    |
| TCGA-EF-5831-01A-01R-1660-07 | TCGA-EF-5831 | TCGA-EF-5831-01A | TP | Primary solid Tumor | TCGA-READ | Alive | 127  | NA   | 26331 | 0     | 127  | 72   | male   | Stage IIA  | T3         | N0  | M0  |    |
| TCGA-DY-A1DE-01A-11R-A155-07 | TCGA-DY-A1DE | TCGA-DY-A1DE-01A | TP | Primary solid Tumor | TCGA-READ | Alive | 3932 | NA   | 20504 | 0     | 3932 | 56   | female | Stage IIA  | T3         | N0  | M0  |    |
| TCGA-AF-2692-11A-01R-A32Z-07 | TCGA-AF-2692 | TCGA-AF-2692-11A | NT | Solid Tissue Normal | TCGA-READ | Alive | 412  | NA   | 19830 | 0     | 412  | 54   | female | Stage IIA  | T3         | N0  | M0  |    |
| TCGA-F5-6464-01A-11R-1736-07 | TCGA-F5-6464 | TCGA-F5-6464-01A | TP | Primary solid Tumor | TCGA-READ | Dead  | 0    | 303  | 28168 | 1     | 303  | 77   | female | Stage IIIC | T4b        | N2a | M0  |    |
| TCGA-F5-6863-01A-11R-1928-07 | TCGA-F5-6863 | TCGA-F5-6863-01A | TP | Primary solid Tumor | TCGA-READ | Dead  | 23   | 361  | 25936 | 1     | 361  | 71   | female | Stage IIIB | T4a        | N1  | M0  |    |
| TCGA-AG-3887-01A-01R-1119-07 | TCGA-AG-3887 | TCGA-AG-3887-01A | TP | Primary solid Tumor | TCGA-READ | Alive | 1124 | NA   | 24960 | 0     | 1124 | 68   | male   | Stage IIA  | T3         | N0  | M0  |    |
| TCGA-CL-4957-01A-01R-1736-07 | TCGA-CL-4957 | TCGA-CL-4957-01A | TP | Primary solid Tumor | TCGA-READ | Dead  | 425  | NA   | 29081 | 1     | 425  | 80   | female | NA         | T3         | N1  | M0  |    |
| TCGA-CI-6623-01B-11R-1830-07 | TCGA-CI-6623 | TCGA-CI-6623-01B | TP | Primary solid Tumor | TCGA-READ | Alive | 1443 | NA   | 16177 | 0     | 1443 | 44   | male   | Stage I    | T1         | N0  | M0  |    |
| TCGA-BM-6198-01A-11R-1736-07 | TCGA-BM-6198 | TCGA-BM-6198-01A | TP | Primary solid Tumor | TCGA-READ | Alive | 646  | NA   | 26837 | 0     | 646  | 74   | male   | Stage IIIB | T3         | N1  | NA  |    |
| TCGA-EI-6506-01A-11R-1736-07 | TCGA-EI-6506 | TCGA-EI-6506-01A | TP | Primary solid Tumor | TCGA-READ | Alive | 625  | NA   | 28587 | 0     | 625  | 78   | female | Stage IIA  | T3         | N0  | M0  |    |
| TCGA-AG-3594-01A-02R-0821-07 | TCGA-AG-3594 | TCGA-AG-3594-01A | TP | Primary solid Tumor | TCGA-READ | Dead  | 0    | 61   | 28277 | 1     | 61   | 77   | male   | Stage IIA  | T3         | N0  | M0  |    |
| TCGA-AG-A002-01A-01R-A002-07 | TCGA-AG-A002 | TCGA-AG-A002-01A | TP | Primary solid Tumor | TCGA-READ | Alive | 638  | NA   | 13090 | 0     | 638  | 36   | male   | Stage I    | T2         | N0  | M0  |    |
| TCGA-CL-5917-01A-11R-1660-07 | TCGA-CL-5917 | TCGA-CL-5917-01A | TP | Primary solid Tumor | TCGA-READ | Alive | 2376 | NA   | 26084 | 0     | 2376 | 71   | female | Stage IIIC | T3         | N2  | MX  |    |
| TCGA-AG-A014-01A-02R-A002-07 | TCGA-AG-A014 | TCGA-AG-A014-01A | TP | Primary solid Tumor | TCGA-READ | Alive | 485  | NA   | 31718 | 0     | 485  | 87   | male   | Stage I    | T2         | N0  | M0  |    |
| TCGA-AG-3598-01A-01R-0826-07 | TCGA-AG-3598 | TCGA-AG-3598-01A | TP | Primary solid Tumor | TCGA-READ | Alive | 1522 | NA   | 25324 | 0     | 1522 | 69   | male   | Stage IIA  | T3         | N0  | M0  |    |
| TCGA-AF-A56N-01A-12R-A39D-07 | TCGA-AF-A56N | TCGA-AF-A56N-01A | TP | Primary solid Tumor | TCGA-READ | Alive | 360  | NA   | 17480 | 0     | 360  | 48   | female | Stage IIA  | T3         | N0  | M0  |    |
| TCGA-G5-6641-01A-11R-A32Z-07 | TCGA-G5-6641 | TCGA-G5-6641-01A | TP | Primary solid Tumor | TCGA-READ | Alive | 804  | NA   | 24486 | 0     | 804  | 67   | male   | Stage IIIA | T1         | N1  | MX  |    |
| TCGA-DY-A1DD-01A-21R-A155-07 | TCGA-DY-A1DD | TCGA-DY-A1DD-01A | TP | Primary solid Tumor | TCGA-READ | Dead  | 1741 | 1741 | 28159 | 1     | 1741 | 77   | female | Stage IIIB | T3         | N1  | M0  |    |
| TCGA-EF-5830-01A-01R-1660-07 | TCGA-EF-5830 | TCGA-EF-5830-01A | TP | Primary solid Tumor | TCGA-READ | Alive | 106  | NA   | 19802 | 0     | 106  | 54   | male   | Stage IIB  | T4a        | N0  | M0  |    |
| TCGA-AG-3609-01A-02R-0826-07 | TCGA-AG-3609 | TCGA-AG-3609-01A | TP | Primary solid Tumor | TCGA-READ | Alive | 608  | NA   | 23925 | 0     | 608  | 66   | female | Stage IIIC | T3         | N2  | M0  |    |
| TCGA-CI-6624-01C-11R-1830-07 | TCGA-CI-6624 | TCGA-CI-6624-01C | TP | Primary solid Tumor | TCGA-READ | Alive | 1466 | NA   | 19419 | 0     | 1466 | 53   | female | Stage I    | T2         | N0  | M0  |    |
| TCGA-AG-A016-01A-01R-A002-07 | TCGA-AG-A016 | TCGA-AG-A016-01A | TP | Primary solid Tumor | TCGA-READ | Alive | 276  | NA   | 20178 | 0     | 276  | 55   | male   | Stage IV   | T3         | N2  | M1  |    |
| TCGA-AG-A01L-01A-01R-A002-07 | TCGA-AG-A01L | TCGA-AG-A01L-01A | TP | Primary solid Tumor | TCGA-READ | Alive | 0    | NA   | 21369 | 0     | 0    | 59   | male   | Stage IIIB | T3         | N1  | M0  |    |
| TCGA-AG-3732-11A-01R-1660-07 | TCGA-AG-3732 | TCGA-AG-3732-11A | NT | Solid Tissue Normal | TCGA-READ | Alive | 1003 | NA   | 28521 | 0     | 1003 | 78   | female | Stage I    | T2         | N0  | M0  |    |
| TCGA-AG-3732-01A-11R-1660-07 | TCGA-AG-3732 | TCGA-AG-3732-01A | TP | Primary solid Tumor | TCGA-READ | Alive | 1003 | NA   | 28521 | 0     | 1003 | 78   | female | Stage I    | T2         | N0  | M0  |    |
| TCGA-AG-A00H-01A-01R-A00A-07 | TCGA-AG-A00H | TCGA-AG-A00H-01A | TP | Primary solid Tumor | TCGA-READ | Alive | 790  | NA   | 27485 | 0     | 790  | 75   | male   | Stage IIA  | T3         | N0  | M0  |    |
| TCGA-AG-4007-01A-01R-1119-07 | TCGA-AG-4007 | TCGA-AG-4007-01A | TP | Primary solid Tumor | TCGA-READ | Alive | 31   | NA   | 31776 | 0     | 31   | 87   | male   | Stage IV   | T4         | N2  | M1  |    |
| TCGA-AG-3591-01A-01R-1736-07 | TCGA-AG-3591 | TCGA-AG-3591-01A | TP | Primary solid Tumor | TCGA-READ | Alive | 1035 | NA   | 24167 | 0     | 1035 | 66   | female | Stage IIA  | T3         | N0  | M0  |    |
| TCGA-AG-A02X-01A-01R-A00A-07 | TCGA-AG-A02X | TCGA-AG-A02X-01A | TP | Primary solid Tumor | TCGA-READ | Alive | 1247 | NA   | 28399 | 0     | 1247 | 78   | male   | Stage I    | T2         | N0  | M0  |    |
| TCGA-DY-A1DF-01A-11R-A155-07 | TCGA-DY-A1DF | TCGA-DY-A1DF-01A | TP | Primary solid Tumor | TCGA-READ | Dead  | 734  | 734  | 26763 | 1     | 734  | 73   | female | Stage IIIC | T3         | N2  | M0  |    |
| TCGA-EI-6884-01A-11R-1928-07 | TCGA-EI-6884 | TCGA-EI-6884-01A | TP | Primary solid Tumor | TCGA-READ | Alive | 328  | NA   | 25995 | 0     | 328  | 71   | male   | Stage IIIA | T3         | N1  | M0  |    |
| TCGA-AG-3902-01A-01R-A32Z-07 | TCGA-AG-3902 | TCGA-AG-3902-01A | TP | Primary solid Tumor | TCGA-READ | Alive | 974  | NA   | 22492 | 0     | 974  | 62   | male   | Stage IIA  | T3         | N0  | M0  |    |
| TCGA-AG-A015-01A-01R-A002-07 | TCGA-AG-A015 | TCGA-AG-A015-01A | TP | Primary solid Tumor | TCGA-READ | Alive | 1096 | NA   | 23496 | 0     | 1096 | 64   | female | Stage I    | T1         | N0  | M0  |    |
| TCGA-AF-4110-01A-02R-1736-07 | TCGA-AF-4110 | TCGA-AF-4110-01A | TP | Primary solid Tumor | TCGA-READ | Alive | 912  | NA   | 28289 | 0     | 912  | 78   | male   | Stage IVA  | T4a        | N2b | MX  |    |
| TCGA-AF-2691-11A-01R-A32Z-07 | TCGA-AF-2691 | TCGA-AF-2691-11A | NT | Solid Tissue Normal | TCGA-READ | Alive | 1309 | NA   | 17759 | 0     | 1309 | 49   | female | Stage I    | T1         | N0  | M0  |    |
| TCGA-AF-2691-01A-01R-0821-07 | TCGA-AF-2691 | TCGA-AF-2691-01A | TP | Primary solid Tumor | TCGA-READ | Alive | 1309 | NA   | 17759 | 0     | 1309 | 49   | female | Stage I    | T1         | N0  | M0  |    |
| TCGA-AG-3731-01A-11R-1736-07 | TCGA-AG-3731 | TCGA-AG-3731-01A | TP | Primary solid Tumor | TCGA-READ | Alive | 1126 | NA   | 23923 | 0     | 1126 | 66   | male   | Stage IV   | T3         | N1  | M1  |    |
| TCGA-DY-A1DG-01A-11R-A32Y-07 | TCGA-DY-A1DG | TCGA-DY-A1DG-01A | TP | Primary solid Tumor | TCGA-READ | Dead  | NA   | 1566 | 27396 | 1     | 1566 | 75   | male   | Stage IVA  | T3         | N1  | M1  |    |
| TCGA-CI-6619-01B-11R-1830-07 | TCGA-CI-6619 | TCGA-CI-6619-01B | TP | Primary solid Tumor | TCGA-READ | Alive | 184  | NA   | 15322 | 0     | 184  | 42   | male   | Stage IV   | T3         | N1c | M1  |    |
| TCGA-DC-6157-01A-11R-1660-07 | TCGA-DC-6157 | TCGA-DC-6157-01A | TP | Primary solid Tumor | TCGA-READ | Alive | 1581 | NA   | 17807 | 0     | 1581 | 49   | male   | Stage I    | T2         | N0  | M0  |    |
| TCGA-DC-4745-01A-01R-A32Z-07 | TCGA-DC-4745 | TCGA-DC-4745-01A | TP | Primary solid Tumor | TCGA-READ | Alive | 639  | NA   | 17958 | 0     | 639  | 49   | female | Stage IIIB | T3         | N1a | M0  |    |
| TCGA-AG-3584-01A-01R-0821-07 | TCGA-AG-3584 | TCGA-AG-3584-01A | TP | Primary solid Tumor | TCGA-READ | Dead  | 0    | 730  | 22189 | 1     | 730  | 61   | male   | Stage IV   | T3         | N2  | M1  |    |
| TCGA-AG-4022-01A-01R-1736-07 | TCGA-AG-4022 | TCGA-AG-4022-01A | TP | Primary solid Tumor | TCGA-READ | Alive | 1400 | NA   | 21823 | 0     | 1400 | 60   | female | Stage II   | T3         | N0  | M0  |    |
| TCGA-AG-3893-01A-01R-1119-07 | TCGA-AG-3893 | TCGA-AG-3893-01A | TP | Primary solid Tumor | TCGA-READ | Alive | 1065 | NA   | 22722 | 0     | 1065 | 75   | male   | Stage IIIB | T3         | N1  | M0  |    |
| TCGA-AG-3881-01A-01R-0905-07 | TCGA-AG-3881 | TCGA-AG-3881-01A | TP | Primary solid Tumor | TCGA-READ | Alive | 579  | NA   | 30467 | 0     | 579  | 83   | female | Stage IIA  | T3         | N0  | M0  |    |
| TCGA-DY-A1H8-01A-21R-A155-07 | TCGA-DY-A1H8 | TCGA-DY-A1H8-01A | TP | Primary solid Tumor | TCGA-READ | Dead  | 992  | 992  | 28459 | 1     | 992  | 78   | female | Stage IIIA | T2         | N1  | M0  |    |
| TCGA-AG-3883-01A-02R-0905-07 | TCGA-AG-3883 | TCGA-AG-3883-01A | TP | Primary solid Tumor | TCGA-READ | Alive | 31   | NA   | 25415 | 0     | 31   | 70   | male   | Stage I    | T2         | N0  | M0  |    |
| TCGA-AG-3882-01A-01R-0905-07 | TCGA-AG-3882 | TCGA-AG-3882-01A | TP | Primary solid Tumor | TCGA-READ | Alive | 608  | NA   | 24198 | 0     | 608  | 66   | female | Stage I    | T2         | N0  | M0  |    |
| TCGA-AG-3601-01A-01R-0826-07 | TCGA-AG-3601 | TCGA-AG-3601-01A | TP | Primary solid Tumor | TCGA-READ | Alive | 0    | NA   | 24837 | 0     | 0    | 68   | male   | Stage IIIB | T4         | N1  | M0  |    |
| TCGA-F5-6813-01A-11R-1830-07 | TCGA-F5-6813 | TCGA-F5-6813-01A | TP | Primary solid Tumor | TCGA-READ | Dead  | 252  | 598  | 25651 | 1     | 598  | 70   | male   | Stage IIIC | T4a        | N2  | M0  |    |

|                              |              |                  |    |                     |           |       |      |      |       |   |      |    |        |            |    |     |     |
|------------------------------|--------------|------------------|----|---------------------|-----------|-------|------|------|-------|---|------|----|--------|------------|----|-----|-----|
| TCGA-AG-3608-01A-01R-0826-07 | TCGA-AG-3608 | TCGA-AG-3608-01A | TP | Primary solid Tumor | TCGA-READ | Alive | 485  | NA   | 29008 | 0 | 485  | 79 | female | Stage IIA  | T3 | N0  | M0  |
| TCGA-F5-6702-01A-11R-1830-07 | TCGA-F5-6702 | TCGA-F5-6702-01A | TP | Primary solid Tumor | TCGA-READ | Dead  | 452  | 869  | 26123 | 1 | 869  | 72 | male   | Stage IVA  | T3 | N1  | M1  |
| TCGA-AH-6643-01A-11R-1830-07 | TCGA-AH-6643 | TCGA-AH-6643-01A | TP | Primary solid Tumor | TCGA-READ | Dead  | 21   | 1314 | 18273 | 1 | 1314 | 50 | male   | Stage IIIC | T3 | N2b | M0  |
| TCGA-CI-6622-01A-11R-1830-07 | TCGA-CI-6622 | TCGA-CI-6622-01A | TP | Primary solid Tumor | TCGA-READ | Alive | 1362 | NA   | 27336 | 0 | 1362 | 75 | male   | Stage IIB  | T4 | N0  | M0  |
| TCGA-G5-6233-01A-11R-1736-07 | TCGA-G5-6233 | TCGA-G5-6233-01A | TP | Primary solid Tumor | TCGA-READ | Dead  | NA   | 556  | 27190 | 1 | 556  | 74 | male   | NA         | T3 | N2  | M0  |
| TCGA-AG-3742-11A-01R-1660-07 | TCGA-AG-3742 | TCGA-AG-3742-11A | NT | Solid Tissue Normal | TCGA-READ | Alive | 30   | NA   | 31078 | 0 | 30   | 85 | female | Stage I    | T1 | N0  | M0  |
| TCGA-AG-3742-01A-11R-1660-07 | TCGA-AG-3742 | TCGA-AG-3742-01A | TP | Primary solid Tumor | TCGA-READ | Alive | 30   | NA   | 31078 | 0 | 30   | 85 | female | Stage I    | T1 | N0  | M0  |
| TCGA-AG-3725-01A-11R-1736-07 | TCGA-AG-3725 | TCGA-AG-3725-01A | TP | Primary solid Tumor | TCGA-READ | Alive | 0    | NA   | 32872 | 0 | 0    | 90 | female | Stage III  | T3 | N2  | M0  |
| TCGA-AG-A00Y-01A-02R-A002-07 | TCGA-AG-A00Y | TCGA-AG-A00Y-01A | TP | Primary solid Tumor | TCGA-READ | Alive | 700  | NA   | 24837 | 0 | 700  | 68 | male   | Stage IIA  | T3 | N0  | M0  |
| TCGA-AG-3878-01A-02R-0905-07 | TCGA-AG-3878 | TCGA-AG-3878-01A | TP | Primary solid Tumor | TCGA-READ | Alive | 30   | NA   | 23527 | 0 | 30   | 64 | male   | Stage I    | T2 | N0  | M0  |
| TCGA-AG-3582-01A-01R-0821-07 | TCGA-AG-3582 | TCGA-AG-3582-01A | TP | Primary solid Tumor | TCGA-READ | Dead  | 31   | 1096 | 27636 | 1 | 1096 | 76 | male   | Stage IV   | T3 | N1  | M1  |
| TCGA-AG-3892-01A-01R-1119-07 | TCGA-AG-3892 | TCGA-AG-3892-01A | TP | Primary solid Tumor | TCGA-READ | Alive | 396  | NA   | 20880 | 0 | 396  | 57 | female | Stage I    | T1 | N0  | M0  |
| TCGA-AG-3587-01A-01R-0821-07 | TCGA-AG-3587 | TCGA-AG-3587-01A | TP | Primary solid Tumor | TCGA-READ | Alive | 1400 | NA   | 24075 | 0 | 1400 | 66 | male   | Stage I    | T2 | N0  | M0  |
| TCGA-AF-3400-01A-01R-0821-07 | TCGA-AF-3400 | TCGA-AF-3400-01A | TP | Primary solid Tumor | TCGA-READ | Alive | 1049 | NA   | 19826 | 0 | 1049 | 54 | male   | Stage IIA  | T3 | N0  | M0  |
| TCGA-AG-3890-01A-01R-1119-07 | TCGA-AG-3890 | TCGA-AG-3890-01A | TP | Primary solid Tumor | TCGA-READ | Alive | 518  | NA   | 22950 | 0 | 518  | 63 | male   | Stage I    | T2 | N0  | M0  |
| TCGA-EI-6882-01A-11R-1928-07 | TCGA-EI-6882 | TCGA-EI-6882-01A | TP | Primary solid Tumor | TCGA-READ | Alive | 262  | NA   | 21682 | 0 | 262  | 59 | male   | Stage IIA  | T3 | N0  | M0  |
| TCGA-F5-6812-01A-11R-1830-07 | TCGA-F5-6812 | TCGA-F5-6812-01A | TP | Primary solid Tumor | TCGA-READ | Alive | 1110 | NA   | 24490 | 0 | 1110 | 67 | male   | Stage IIA  | T3 | N0  | M0  |
| TCGA-DC-5869-01A-01R-1660-07 | TCGA-DC-5869 | TCGA-DC-5869-01A | TP | Primary solid Tumor | TCGA-READ | Alive | 943  | NA   | 22676 | 0 | 943  | 62 | female | Stage IIIB | T3 | N1a | M0  |
| TCGA-AG-3885-01A-01R-0905-07 | TCGA-AG-3885 | TCGA-AG-3885-01A | TP | Primary solid Tumor | TCGA-READ | Alive | 546  | NA   | 26145 | 0 | 546  | 72 | female | Stage IIIB | T3 | N1  | M0  |
| TCGA-AF-6655-01A-11R-1830-07 | TCGA-AF-6655 | TCGA-AF-6655-01A | TP | Primary solid Tumor | TCGA-READ | Alive | 609  | NA   | 24417 | 0 | 609  | 67 | male   | Stage IIIA | T2 | N1  | M0  |
| TCGA-AG-3727-01A-01R-0905-07 | TCGA-AG-3727 | TCGA-AG-3727-01A | TP | Primary solid Tumor | TCGA-READ | Alive | 30   | NA   | 28641 | 0 | 30   | 78 | female | Stage III  | T3 | N1  | M0  |
| TCGA-AG-A008-01A-01R-A002-07 | TCGA-AG-A008 | TCGA-AG-A008-01A | TP | Primary solid Tumor | TCGA-READ | Alive | 424  | NA   | 18416 | 0 | 424  | 50 | female | Stage I    | T2 | N0  | M0  |
| TCGA-F5-6465-01A-11R-1736-07 | TCGA-F5-6465 | TCGA-F5-6465-01A | TP | Primary solid Tumor | TCGA-READ | Alive | 1506 | NA   | 23432 | 0 | 1506 | 64 | female | Stage IIA  | T3 | N0  | M0  |
| TCGA-AG-4001-01A-02R-1119-07 | TCGA-AG-4001 | TCGA-AG-4001-01A | TP | Primary solid Tumor | TCGA-READ | Alive | 1096 | NA   | 27302 | 0 | 1096 | 75 | female | Stage IIA  | T3 | N0  | M0  |
| TCGA-F5-6861-01A-11R-1928-07 | TCGA-F5-6861 | TCGA-F5-6861-01A | TP | Primary solid Tumor | TCGA-READ | Alive | 1160 | NA   | 21936 | 0 | 1160 | 60 | female | Stage IIA  | T3 | N0  | M0  |
| TCGA-AG-4021-01A-01R-1736-07 | TCGA-AG-4021 | TCGA-AG-4021-01A | TP | Primary solid Tumor | TCGA-READ | Dead  | 0    | 121  | 31015 | 1 | 121  | 85 | female | Stage IV   | T3 | N2  | M1  |
| TCGA-AG-3580-01A-01R-0821-07 | TCGA-AG-3580 | TCGA-AG-3580-01A | TP | Primary solid Tumor | TCGA-READ | Alive | 244  | NA   | 24775 | 0 | 244  | 68 | male   | Stage I    | T1 | N0  | M0  |
| TCGA-AG-3999-01A-01R-1119-07 | TCGA-AG-3999 | TCGA-AG-3999-01A | TP | Primary solid Tumor | TCGA-READ | Alive | 853  | NA   | 22311 | 0 | 853  | 61 | female | Stage IIIC | T3 | N2  | M0  |
| TCGA-AF-2692-01A-01R-0821-07 | TCGA-AF-2692 | TCGA-AF-2692-01A | TP | Primary solid Tumor | TCGA-READ | Alive | 412  | NA   | 19830 | 0 | 412  | 54 | female | Stage IIA  | T3 | N0  | M0  |
| TCGA-AG-4008-01A-01R-1119-07 | TCGA-AG-4008 | TCGA-AG-4008-01A | TP | Primary solid Tumor | TCGA-READ | Alive | 518  | NA   | 23192 | 0 | 518  | 64 | male   | Stage IIA  | T3 | N0  | M0  |
| TCGA-AH-6544-01A-11R-1830-07 | TCGA-AH-6544 | TCGA-AH-6544-01A | TP | Primary solid Tumor | TCGA-READ | Alive | 1173 | NA   | 21977 | 0 | 1173 | 60 | male   | NA         | T3 | N1  | M1  |
| TCGA-AG-A025-01A-01R-A00A-07 | TCGA-AG-A025 | TCGA-AG-A025-01A | TP | Primary solid Tumor | TCGA-READ | Alive | 1520 | NA   | 22952 | 0 | 1520 | 63 | female | Stage I    | T1 | N0  | M0  |
| TCGA-AG-3728-01A-01R-0905-07 | TCGA-AG-3728 | TCGA-AG-3728-01A | TP | Primary solid Tumor | TCGA-READ | Alive | 912  | NA   | 26906 | 0 | 912  | 74 | male   | Stage IIIB | T3 | N1  | M0  |
| TCGA-DY-A0XA-01A-11R-A155-07 | TCGA-DY-A0XA | TCGA-DY-A0XA-01A | TP | Primary solid Tumor | TCGA-READ | Alive | 3846 | NA   | 21115 | 0 | 3846 | 58 | female | Stage IIA  | T3 | N0  | M0  |
| TCGA-F5-6571-01A-12R-1830-07 | TCGA-F5-6571 | TCGA-F5-6571-01A | TP | Primary solid Tumor | TCGA-READ | Alive | 1288 | NA   | 22666 | 0 | 1288 | 62 | female | Stage IIA  | T3 | N0  | M0  |
| TCGA-AG-A01W-01A-21R-A083-07 | TCGA-AG-A01W | TCGA-AG-A01W-01A | TP | Primary solid Tumor | TCGA-READ | Alive | 0    | NA   | 24745 | 0 | 0    | 68 | female | Stage II   | T3 | N0  | M0  |
| TCGA-EI-6513-01A-21R-1736-07 | TCGA-EI-6513 | TCGA-EI-6513-01A | TP | Primary solid Tumor | TCGA-READ | Alive | 497  | NA   | 21776 | 0 | 497  | 60 | male   | Stage IIIB | T3 | N1  | M0  |
| TCGA-AG-A01J-01A-01R-A00A-07 | TCGA-AG-A01J | TCGA-AG-A01J-01A | TP | Primary solid Tumor | TCGA-READ | Alive | 31   | NA   | 21581 | 0 | 31   | 59 | female | Stage IIA  | T3 | N0  | M0  |
| TCGA-AG-A01Y-01A-41R-A083-07 | TCGA-AG-A01Y | TCGA-AG-A01Y-01A | TP | Primary solid Tumor | TCGA-READ | Alive | 0    | NA   | 18112 | 0 | 0    | 50 | female | Stage II   | T3 | N0  | M0  |
| TCGA-AG-3593-01A-01R-0821-07 | TCGA-AG-3593 | TCGA-AG-3593-01A | TP | Primary solid Tumor | TCGA-READ | Alive | 1035 | NA   | 26480 | 0 | 1035 | 73 | female | Stage IIA  | T3 | N0  | M0  |
| TCGA-AH-6549-01A-11R-1830-07 | TCGA-AH-6549 | TCGA-AH-6549-01A | TP | Primary solid Tumor | TCGA-READ | Alive | 532  | NA   | 24337 | 0 | 532  | 67 | male   | NA         | T3 | NX  | MX  |
| TCGA-AF-3911-01A-01R-1736-07 | TCGA-AF-3911 | TCGA-AF-3911-01A | TP | Primary solid Tumor | TCGA-READ | Alive | 1148 | NA   | 17609 | 0 | 1148 | 48 | male   | Stage IIIC | T3 | N2  | MX  |
| TCGA-AG-4015-01A-01R-1119-07 | TCGA-AG-4015 | TCGA-AG-4015-01A | TP | Primary solid Tumor | TCGA-READ | Alive | 0    | NA   | 31291 | 0 | 0    | 86 | female | Stage IIA  | T3 | N0  | M0  |
| TCGA-DC-6681-01A-11R-A32Z-07 | TCGA-DC-6681 | TCGA-DC-6681-01A | TP | Primary solid Tumor | TCGA-READ | Alive | 790  | NA   | 25659 | 0 | 790  | 70 | female | Stage IVA  | T3 | N2a | M1a |
| TCGA-F5-6864-01A-11R-1928-07 | TCGA-F5-6864 | TCGA-F5-6864-01A | TP | Primary solid Tumor | TCGA-READ | Alive | 379  | NA   | 27058 | 0 | 379  | 74 | female | Stage IIIB | T3 | N2a | M0  |
| TCGA-AF-2690-01A-02R-1736-07 | TCGA-AF-2690 | TCGA-AF-2690-01A | TP | Primary solid Tumor | TCGA-READ | Dead  | 358  | 524  | 28119 | 1 | 524  | 77 | female | Stage IIIC | T3 | N2  | M0  |
| TCGA-EI-6509-01A-11R-1736-07 | TCGA-EI-6509 | TCGA-EI-6509-01A | TP | Primary solid Tumor | TCGA-READ | Alive | 517  | NA   | 19666 | 0 | 517  | 54 | male   | Stage IIIC | T3 | N2b | M0  |
| TCGA-AG-A01N-01A-01R-A00A-07 | TCGA-AG-A01N | TCGA-AG-A01N-01A | TP | Primary solid Tumor | TCGA-READ | Alive | 943  | NA   | 25049 | 0 | 943  | 69 | female | Stage IV   | T2 | N0  | M1  |
| TCGA-AG-3600-01A-01R-0826-07 | TCGA-AG-3600 | TCGA-AG-3600-01A | TP | Primary solid Tumor | TCGA-READ | Alive | 184  | NA   | 22767 | 0 | 184  | 62 | male   | Stage IIIC | T3 | N2  | M0  |
| TCGA-AG-3599-01A-02R-0826-07 | TCGA-AG-3599 | TCGA-AG-3599-01A | TP | Primary solid Tumor | TCGA-READ | Alive | 366  | NA   | 25749 | 0 | 366  | 71 | male   | Stage I    | T2 | N0  | M0  |
| TCGA-AG-A020-01A-21R-A083-07 | TCGA-AG-A020 | TCGA-AG-A020-01A | TP | Primary solid Tumor | TCGA-READ | Alive | 31   | NA   | 20851 | 0 | 31   | 57 | female | Stage III  | T3 | N1  | M0  |
| TCGA-EI-7002-01A-11R-1928-07 | TCGA-EI-7002 | TCGA-EI-7002-01A | TP | Primary solid Tumor | TCGA-READ | Alive | 364  | NA   | 21192 | 0 | 364  | 58 | male   | Stage IV   | T3 | N2  | M1  |
| TCGA-CI-6621-01A-11R-1830-07 | TCGA-CI-6621 | TCGA-CI-6621-01A | TP | Primary solid Tumor | TCGA-READ | Alive | 419  | NA   | 23240 | 0 | 419  | 64 | male   | Stage IIIB | T3 | N1  | MX  |
| TCGA-DC-6160-01A-11R-1660-07 | TCGA-DC-6160 | TCGA-DC-6160-01A | TP | Primary solid Tumor | TCGA-READ | Alive | 1339 | NA   | 24990 | 0 | 1339 | 68 | male   | Stage I    | T2 | N0  | M0  |
| TCGA-AG-3726-01A-02R-0905-07 | TCGA-AG-3726 | TCGA-AG-3726-01A | TP | Primary solid Tumor | TCGA-READ | Alive | 243  | NA   | 23345 | 0 | 243  | 64 | female | Stage I    | T2 | N0  | M0  |
| TCGA-G5-6572-02A-12R-1830-07 | TCGA-G5-6572 | TCGA-G5-6572-02A | TP | Primary solid Tumor | TCGA-READ | Dead  | NA   | 1432 | 20475 | 1 | 1432 | 56 | male   | NA         | NA | NA  | NA  |
| TCGA-EI-6512-01A-11R-1736-07 | TCGA-EI-6512 | TCGA-EI-6512-01A | TP | Primary solid Tumor | TCGA-READ | Alive | 538  | NA   | 23537 | 0 | 538  | 64 | female | Stage IIIB | T3 | N1  | M0  |
| TCGA-AF-3913-01A-02R-1119-07 | TCGA-AF-3913 | TCGA-AF-3913-01A | TP | Primary solid Tumor | TCGA-READ | Dead  | NA   | 316  | 21970 | 1 | 316  | 60 | male   | Stage IV   | T3 | N1  | M1  |
| TCGA-DC-6682-01A-11R-1830-07 | TCGA-DC-6682 | TCGA-DC-6682-01A | TP | Primary solid Tumor | TCGA-READ | Alive | 762  | NA   | 21062 | 0 | 762  | 58 | male   | Stage IIA  | T3 | N0  | M0  |
| TCGA-AH-6897-01A-11R-1928-07 | TCGA-AH-6897 | TCGA-AH-6897-01A | TP | Primary solid Tumor | TCGA-READ | Alive | 804  | NA   | 17536 | 0 | 804  | 48 | male   | Stage I    | T2 | N0  | M0  |
| TCGA-AG-A026-01A-01R-A00A-07 | TCGA-AG-A026 | TCGA-AG-A026-01A | TP | Primary solid Tumor | TCGA-READ | Dead  | NA   | 59   | 24413 | 1 | 59   | 67 | male   | Stage II   | T4 | N0  | M0  |
| TCGA-AF-2689-11A-01R-A32Z-07 | TCGA-AF-2689 | TCGA-AF-2689-11A | NT | Solid Tissue Normal | TCGA-READ | Dead  | 546  | 1201 | 15082 | 1 | 1201 | 41 | female | Stage IV   | T3 | N2  | M1  |

|                              |              |                  |    |                     |           |       |      |      |       |   |      |    |        |            |     |     |     |
|------------------------------|--------------|------------------|----|---------------------|-----------|-------|------|------|-------|---|------|----|--------|------------|-----|-----|-----|
| TCGA-AF-6136-01A-11R-1830-07 | TCGA-AF-6136 | TCGA-AF-6136-01A | TP | Primary solid Tumor | TCGA-READ | Alive | 741  | NA   | 26490 | 0 | 741  | 73 | female | Stage IIIB | T3  | N1b | MX  |
| TCGA-EI-6514-01A-11R-1736-07 | TCGA-EI-6514 | TCGA-EI-6514-01A | TP | Primary solid Tumor | TCGA-READ | Alive | 496  | NA   | 21618 | 0 | 496  | 59 | female | Stage IIA  | T3  | N0  | M0  |
| TCGA-AG-3901-01A-01R-1119-07 | TCGA-AG-3901 | TCGA-AG-3901-01A | TP | Primary solid Tumor | TCGA-READ | Alive | 761  | NA   | 24502 | 0 | 761  | 67 | female | Stage IIIB | T3  | N1  | M0  |
| TCGA-DC-6683-01A-11R-1830-07 | TCGA-DC-6683 | TCGA-DC-6683-01A | TP | Primary solid Tumor | TCGA-READ | Alive | 762  | NA   | 15918 | 0 | 762  | 44 | male   | Stage IIIB | T3  | N1b | M0  |
| TCGA-DC-6158-01A-11R-1660-07 | TCGA-DC-6158 | TCGA-DC-6158-01A | TP | Primary solid Tumor | TCGA-READ | Dead  | 216  | 334  | 25842 | 1 | 334  | 71 | male   | Stage I    | T2  | N0  | M0  |
| TCGA-AG-A02G-01A-01R-A00A-07 | TCGA-AG-A02G | TCGA-AG-A02G-01A | TP | Primary solid Tumor | TCGA-READ | Dead  | 0    | 1185 | 24259 | 1 | 1185 | 66 | male   | Stage IV   | T2  | N1  | M1  |
| TCGA-DC-6156-01A-11R-1660-07 | TCGA-DC-6156 | TCGA-DC-6156-01A | TP | Primary solid Tumor | TCGA-READ | Alive | 943  | NA   | 22706 | 0 | 943  | 62 | male   | Stage IVA  | T4a | N2b | M1a |
| TCGA-AG-3592-01A-02R-1736-07 | TCGA-AG-3592 | TCGA-AG-3592-01A | TP | Primary solid Tumor | TCGA-READ | Alive | 1035 | NA   | 25141 | 0 | 1035 | 69 | male   | Stage IIA  | T3  | N0  | M0  |
| TCGA-AG-3612-01A-01R-0826-07 | TCGA-AG-3612 | TCGA-AG-3612-01A | TP | Primary solid Tumor | TCGA-READ | Alive | 608  | NA   | 20242 | 0 | 608  | 55 | female | Stage IIIB | T3  | N1  | M0  |
| TCGA-AH-6903-01A-11R-1928-07 | TCGA-AH-6903 | TCGA-AH-6903-01A | TP | Primary solid Tumor | TCGA-READ | Alive | 592  | NA   | 17030 | 0 | 592  | 47 | male   | Stage IIIB | T3  | N1b | M0  |
| TCGA-DY-A1DC-01A-31R-A155-07 | TCGA-DY-A1DC | TCGA-DY-A1DC-01A | TP | Primary solid Tumor | TCGA-READ | Dead  | NA   | 1258 | 26436 | 1 | 1258 | 72 | female | Stage IIA  | T3  | N0  | M0  |
| TCGA-AG-4005-01A-01R-1119-07 | TCGA-AG-4005 | TCGA-AG-4005-01A | TP | Primary solid Tumor | TCGA-READ | Alive | 427  | NA   | 23407 | 0 | 427  | 64 | male   | Stage IV   | T3  | N2  | M1  |
| TCGA-EI-6881-01A-11R-A32Z-07 | TCGA-EI-6881 | TCGA-EI-6881-01A | TP | Primary solid Tumor | TCGA-READ | Alive | 499  | NA   | 22057 | 0 | 499  | 60 | male   | Stage IIIA | T3  | N1  | M0  |
| TCGA-AG-A02N-01A-11R-A083-07 | TCGA-AG-A02N | TCGA-AG-A02N-01A | TP | Primary solid Tumor | TCGA-READ | Alive | 1885 | NA   | 24687 | 0 | 1885 | 68 | male   | Stage II   | T3  | N0  | M0  |
| TCGA-AG-3605-01A-01R-0826-07 | TCGA-AG-3605 | TCGA-AG-3605-01A | TP | Primary solid Tumor | TCGA-READ | Alive | 30   | NA   | 31078 | 0 | 30   | 85 | female | Stage IV   | T3  | N1  | M1  |
| TCGA-AG-3909-01A-01R-1119-07 | TCGA-AG-3909 | TCGA-AG-3909-01A | TP | Primary solid Tumor | TCGA-READ | Alive | 608  | NA   | 25537 | 0 | 608  | 70 | female | Stage IIIB | T3  | N1  | M0  |
| TCGA-AG-3586-01A-02R-0821-07 | TCGA-AG-3586 | TCGA-AG-3586-01A | TP | Primary solid Tumor | TCGA-READ | Alive | 31   | NA   | 26542 | 0 | 31   | 73 | female | Stage III  | T3  | N2  | M0  |
| TCGA-F5-6814-01A-31R-1928-07 | TCGA-F5-6814 | TCGA-F5-6814-01A | TP | Primary solid Tumor | TCGA-READ | Alive | 1131 | NA   | 20828 | 0 | 1131 | 57 | male   | Stage IIA  | T3  | N0  | M0  |
| TCGA-EI-7004-01A-11R-1928-07 | TCGA-EI-7004 | TCGA-EI-7004-01A | TP | Primary solid Tumor | TCGA-READ | Alive | 257  | NA   | 13566 | 0 | 257  | 37 | female | NA         | T4a | N2b | M0  |
| TCGA-DC-4749-01A-01R-1736-07 | TCGA-DC-4749 | TCGA-DC-4749-01A | TP | Primary solid Tumor | TCGA-READ | Alive | 762  | NA   | 21092 | 0 | 762  | 58 | male   | Stage I    | T2  | N0  | M0  |
| TCGA-G5-6235-01A-11R-1736-07 | TCGA-G5-6235 | TCGA-G5-6235-01A | TP | Primary solid Tumor | TCGA-READ | Alive | 1696 | NA   | 26348 | 0 | 1696 | 72 | male   | Stage IIIB | T3  | N1  | MX  |
| TCGA-CI-6620-01A-11R-1830-07 | TCGA-CI-6620 | TCGA-CI-6620-01A | TP | Primary solid Tumor | TCGA-READ | Alive | 1009 | NA   | 15322 | 0 | 1009 | 42 | female | Stage IVA  | T3  | N1  | M1  |

Table S3-The sequences of primers used in this study.

| Target Name | Primer |                       |
|-------------|--------|-----------------------|
| β-actin     | F      | CCTGTATGCCTCTGGTCGTA  |
|             | R      | CCATCTCTTGCTCGAAGTCT  |
| SOX4        | F      | AGCGACAAGATCCCTTTCATT |
|             | R      | CGTTGCCGGACTTCACCTT   |

Table S4-SOX4 siRNA sequences

| Target Name | Primer |                         |
|-------------|--------|-------------------------|
| siSOX4 #1   | F      | GGACAGACGAAGAGUUUAATT   |
|             | R      | UUAAACUCUUCGUCUGUCCTT   |
| siSOX4 #2   | F      | AGCGACAAGAUGCCUUUCAUUTT |
|             | R      | AAUGAAAGGGAUCUUGUCGCUTT |
| siSOX4 #3   | F      | GAAGAAGGUGAAGCGCGUCUATT |
|             | R      | UAGACGCGCUUCACCUUCUUCTT |

#1, #2, #3 are three different siSOX4 sequences.

Table S5-liver metastasis related marker gene

| Gene_name | LM         | pCRC       | direction_ | subEpi_02348 | branchList |
|-----------|------------|------------|------------|--------------|------------|
| SOX4      | 2.87161705 | 1.59931205 | 4.59261176 | 1.42695583   | 43         |
| MARCKSL1  | 2.58034351 | 0.96614529 | 2.49298674 | 1.14544126   | 4          |
| HES6      | 2.41129754 | 0.79406648 | 1.91473055 | 1.35147057   | 23         |
| RPS8      | 1.76820325 | 0.27100368 | 0.47918959 | 1.26999158   | 6          |
| DUSP1     | -2.5875094 | -0.5966546 | 1.54384937 | -1.5839124   | 41         |
| HLA-DRB1  | -3.2218242 | -1.927421  | 6.20981152 | -0.7819172   | 49         |
| HLA-DRA   | -3.3163376 | -2.1116601 | 7.0029777  | -1.025851    | 48         |
| CD74      | -3.7163232 | -1.5497261 | 5.75928314 | -1.5186642   | 39         |
| HSPA1A    | -4.8455688 | -1.8907592 | 9.16180392 | -0.4882446   | 46         |
| HSPA1B    | -2.7655495 | -0.5139136 | 1.42125335 | -0.9809029   | 47         |
